# Supplementary material for: Altercrasins A–E, Decalin Derivatives, from a Sea-Urchin-Derived Alternaria sp.: Isolation and Structural Analysis Including Stereochemistry
Source: MDPI journal article supplement (doi:10.3390/md17040218), 2019-04-11

Figure S19  $^1\text{H}$  and  $^{13}\text{C}$  NMR spectra in acetone- $d_6$  of **4**

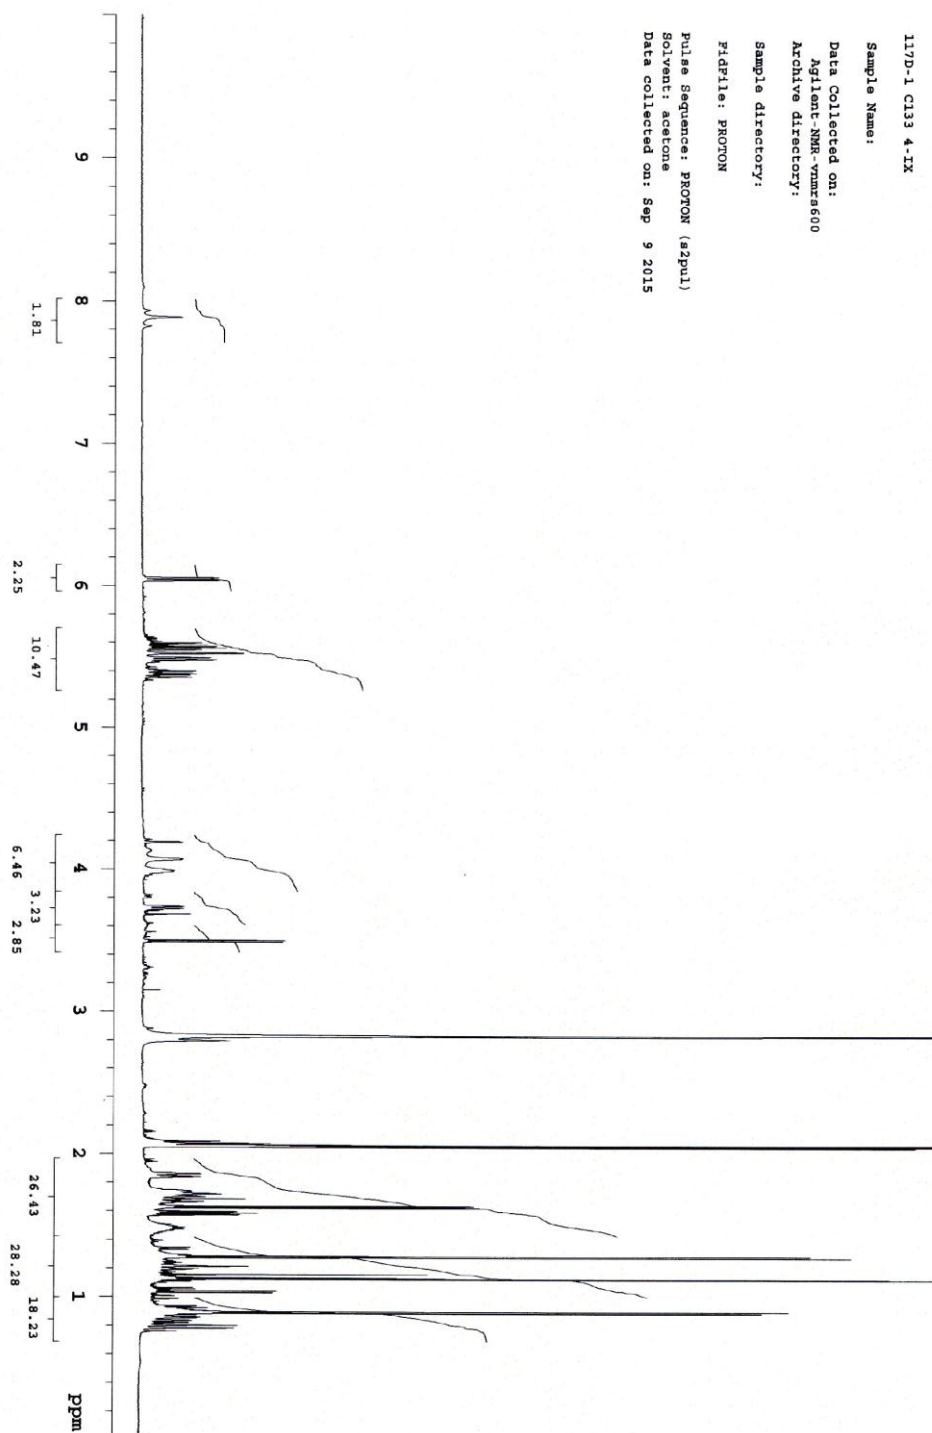

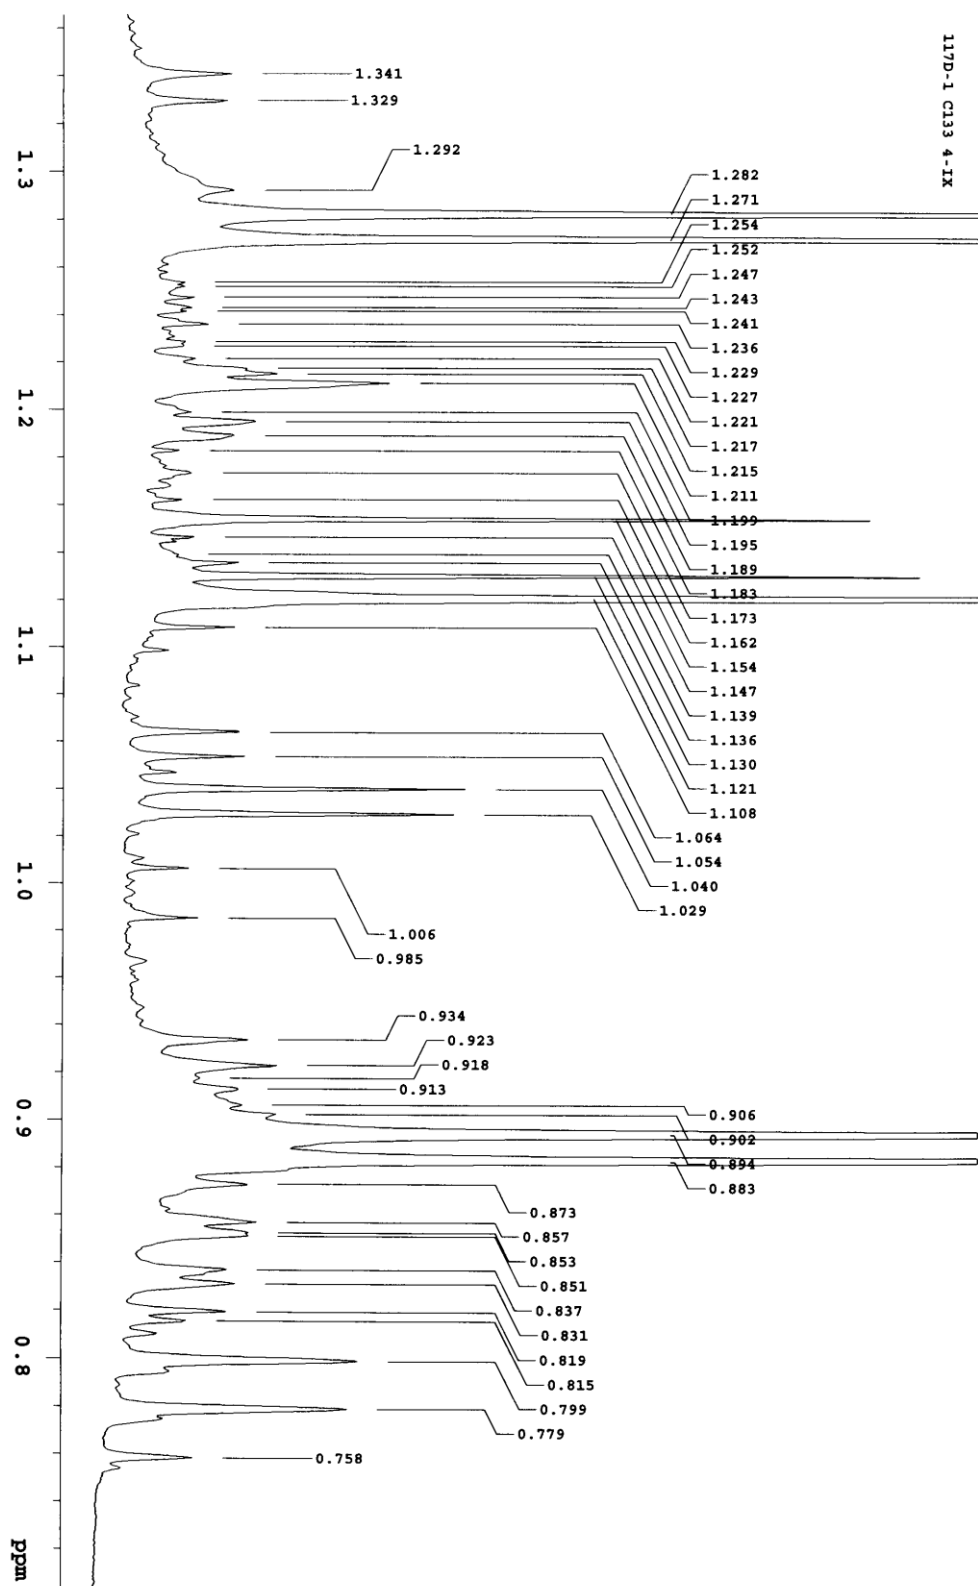

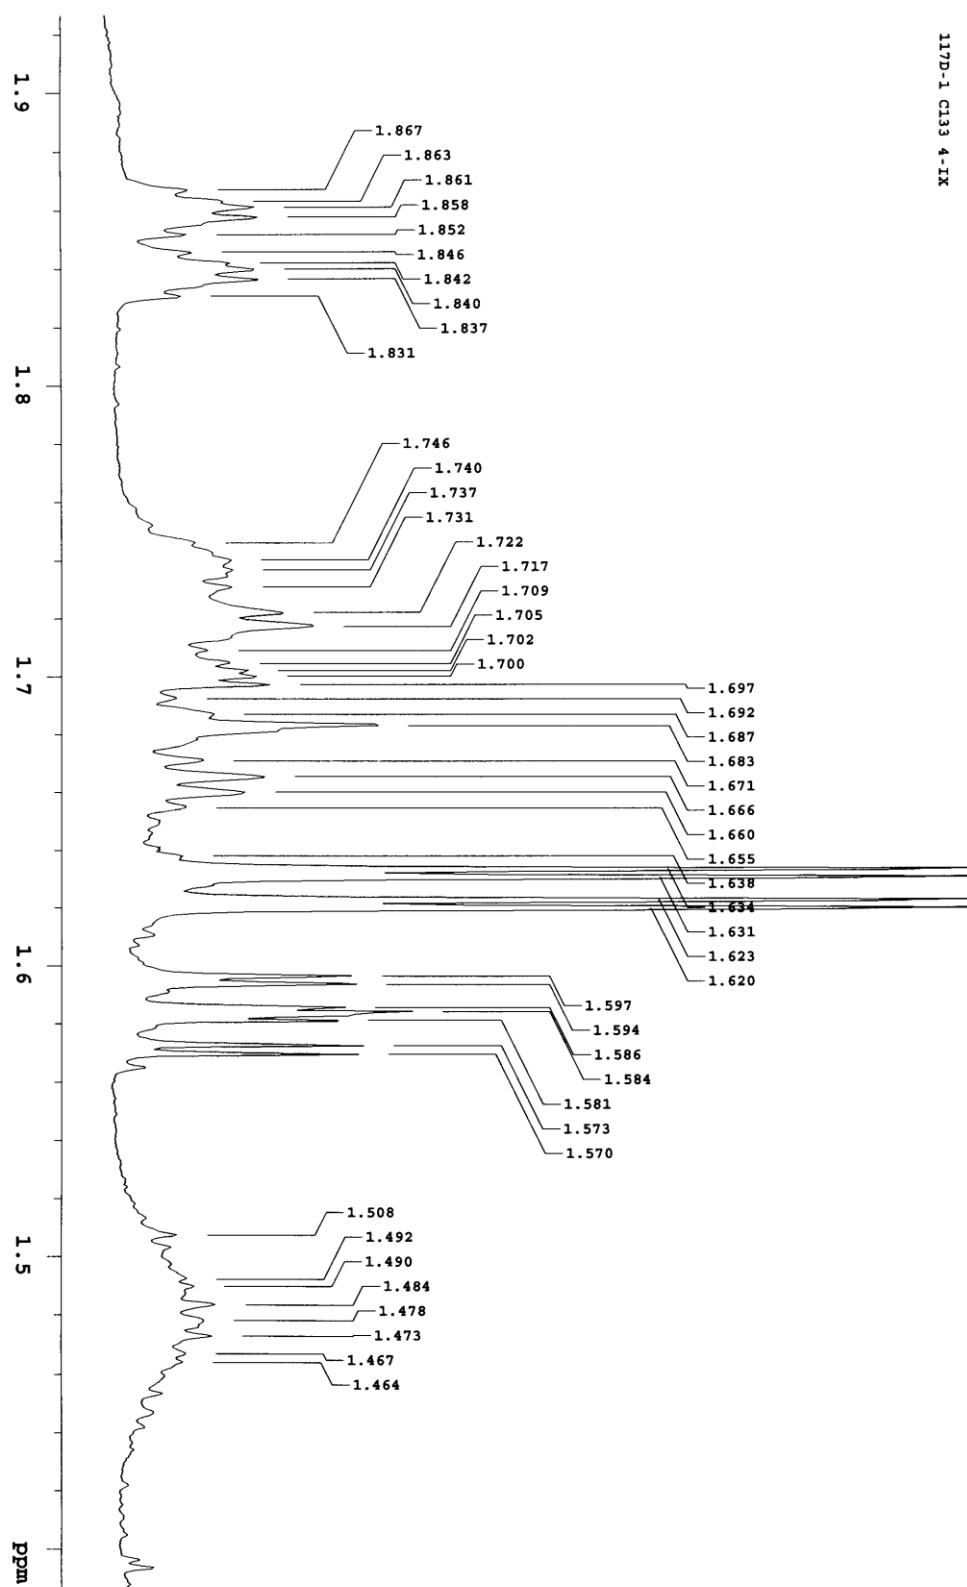

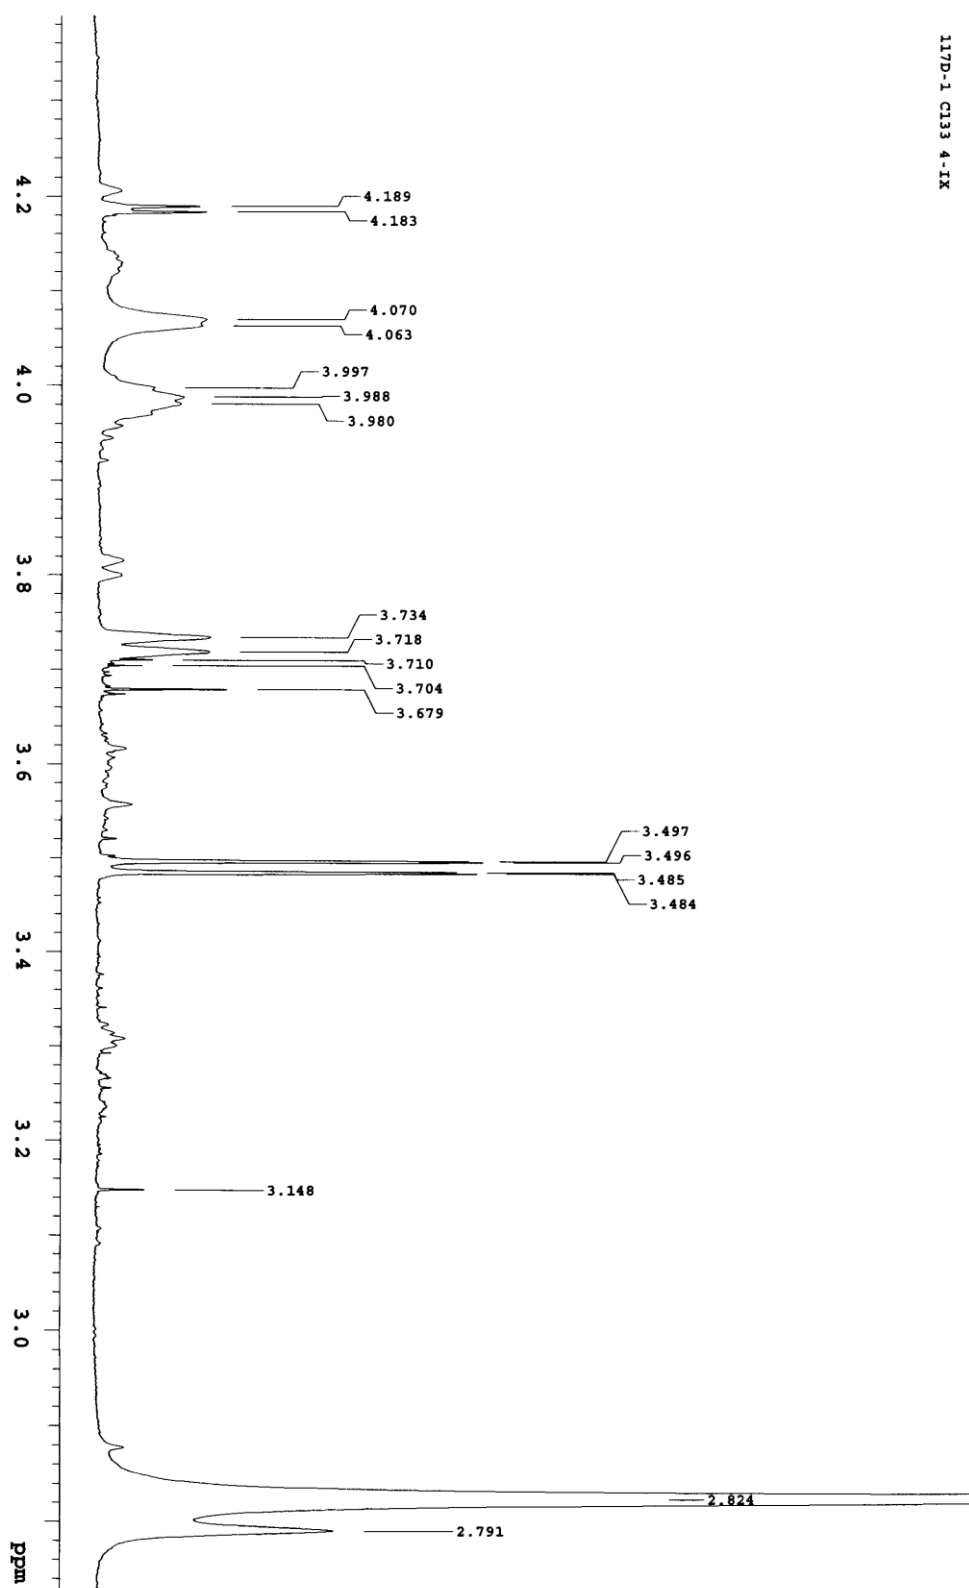

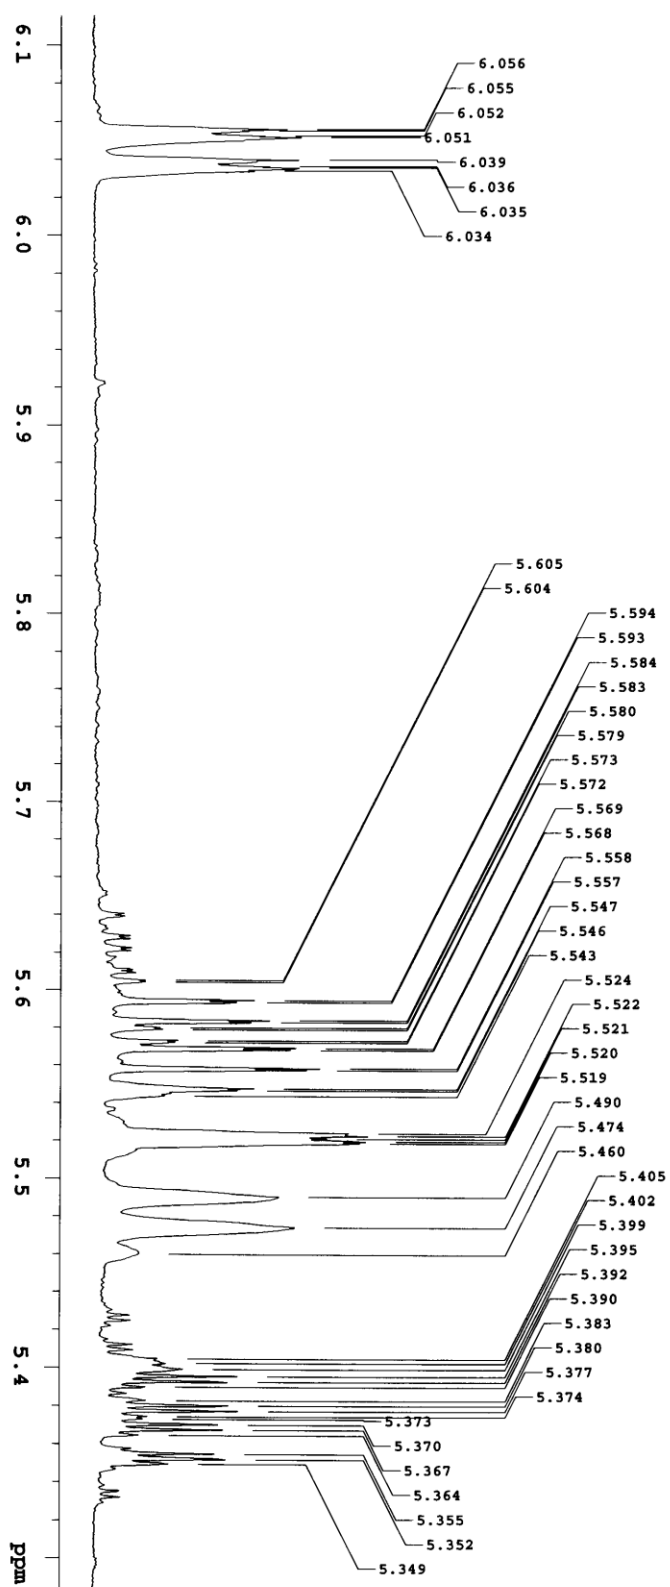

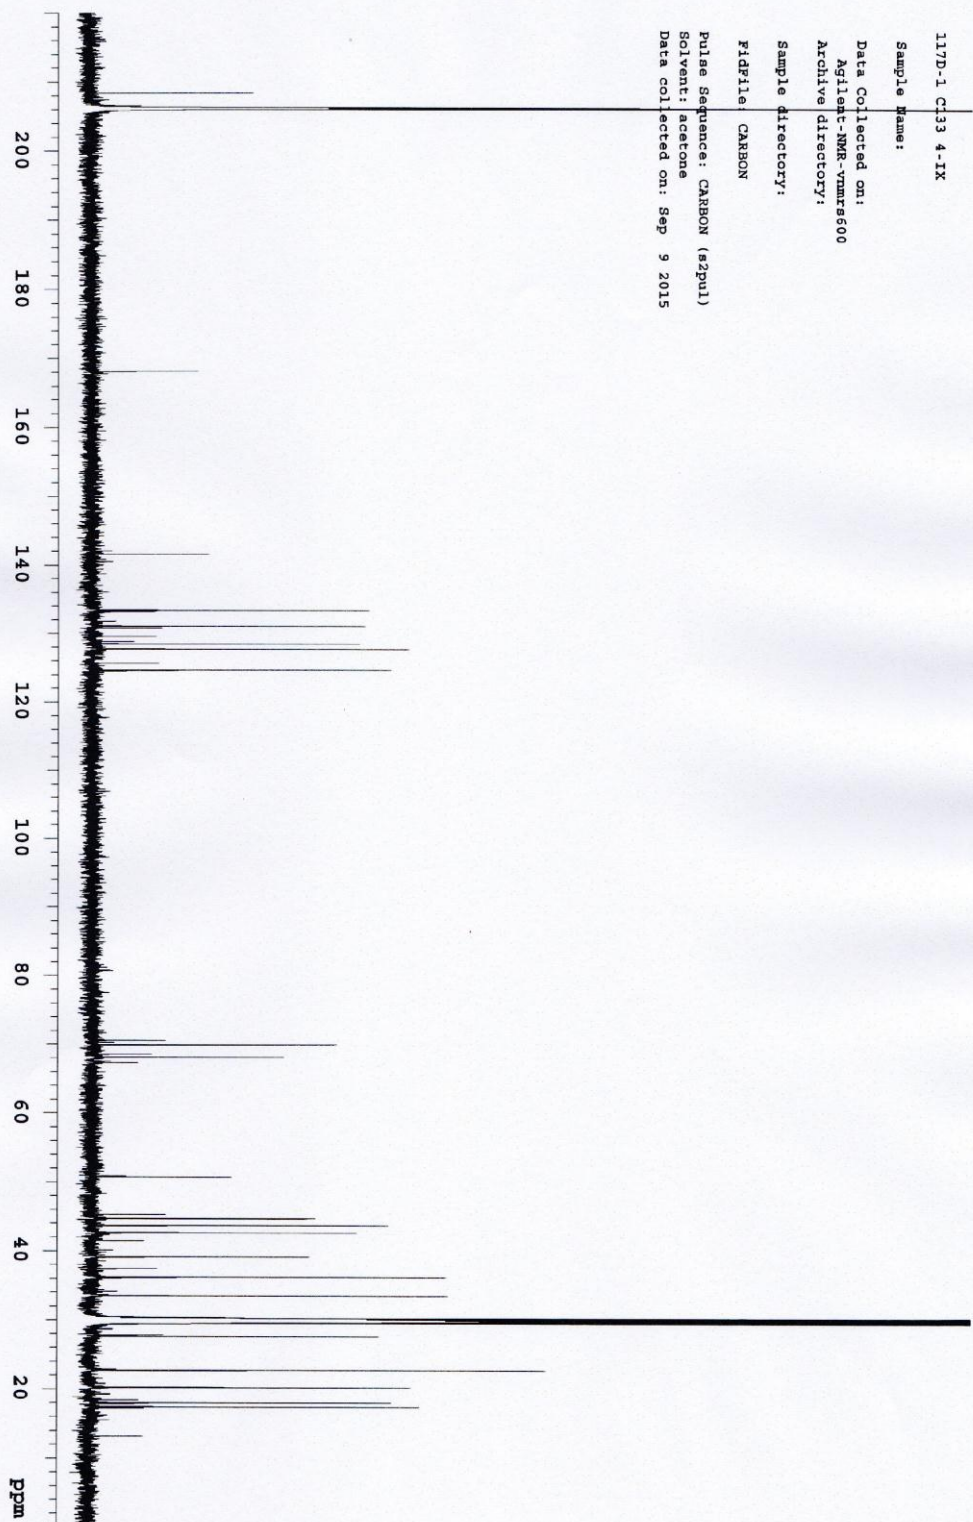

117D-1 CL33 4-IX

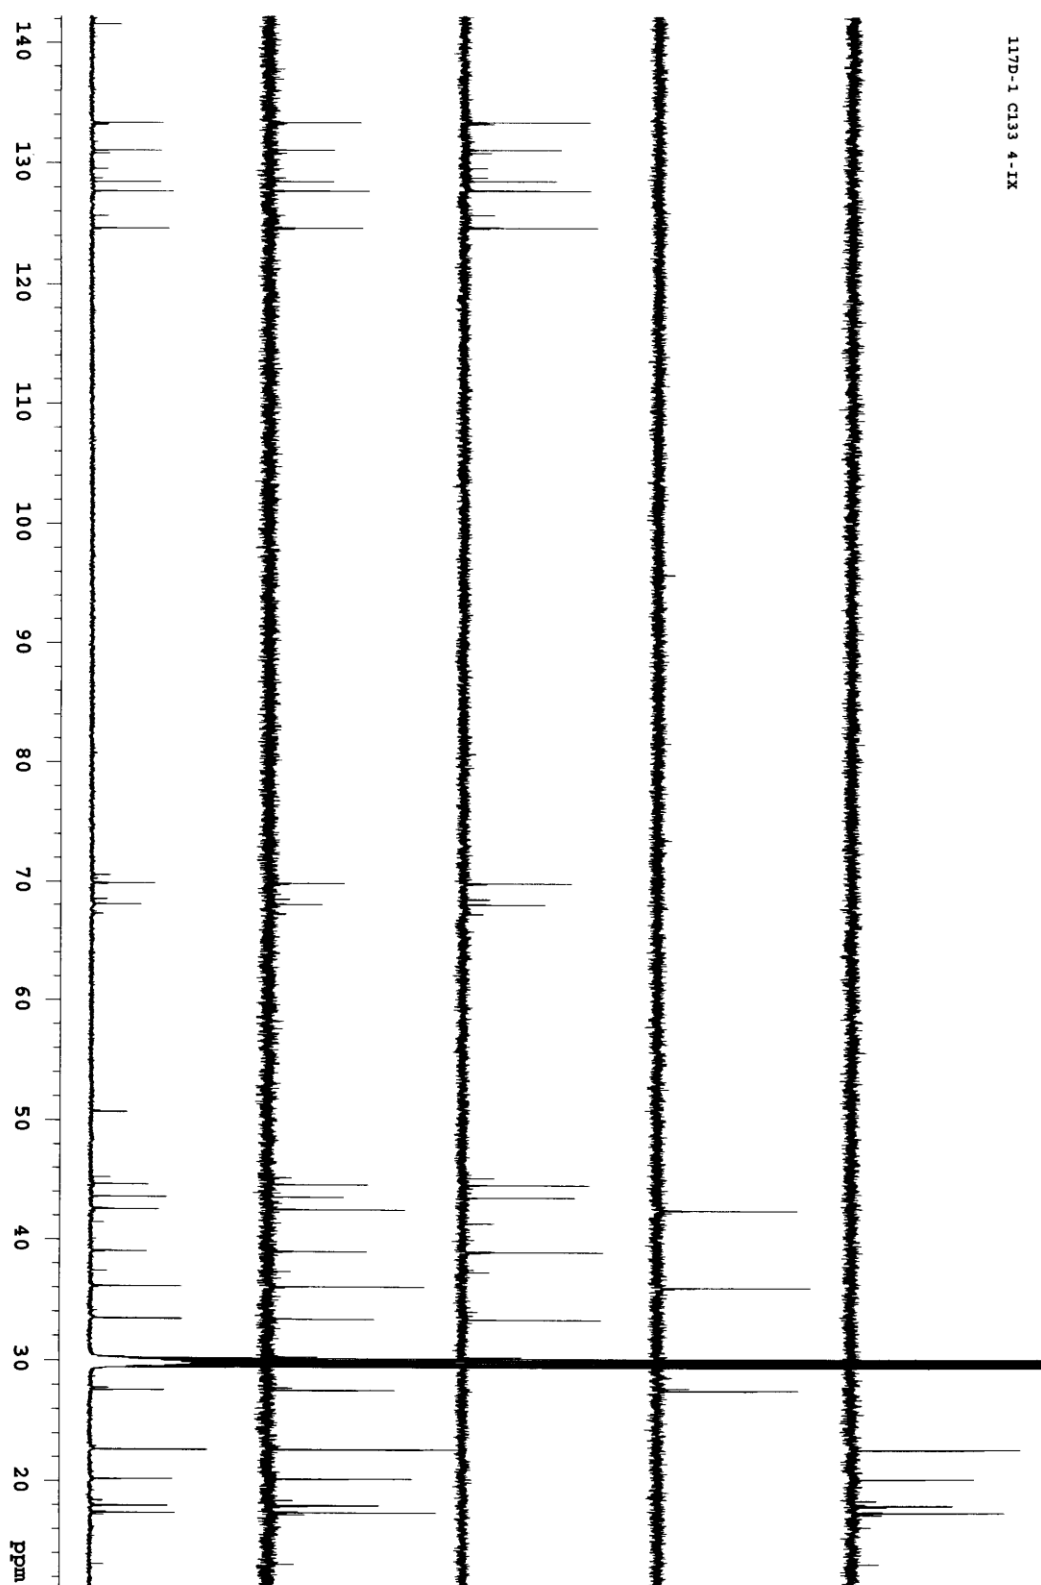

**Figure S20**  $^1\text{H}$ - $^1\text{H}$  COSY of **4**

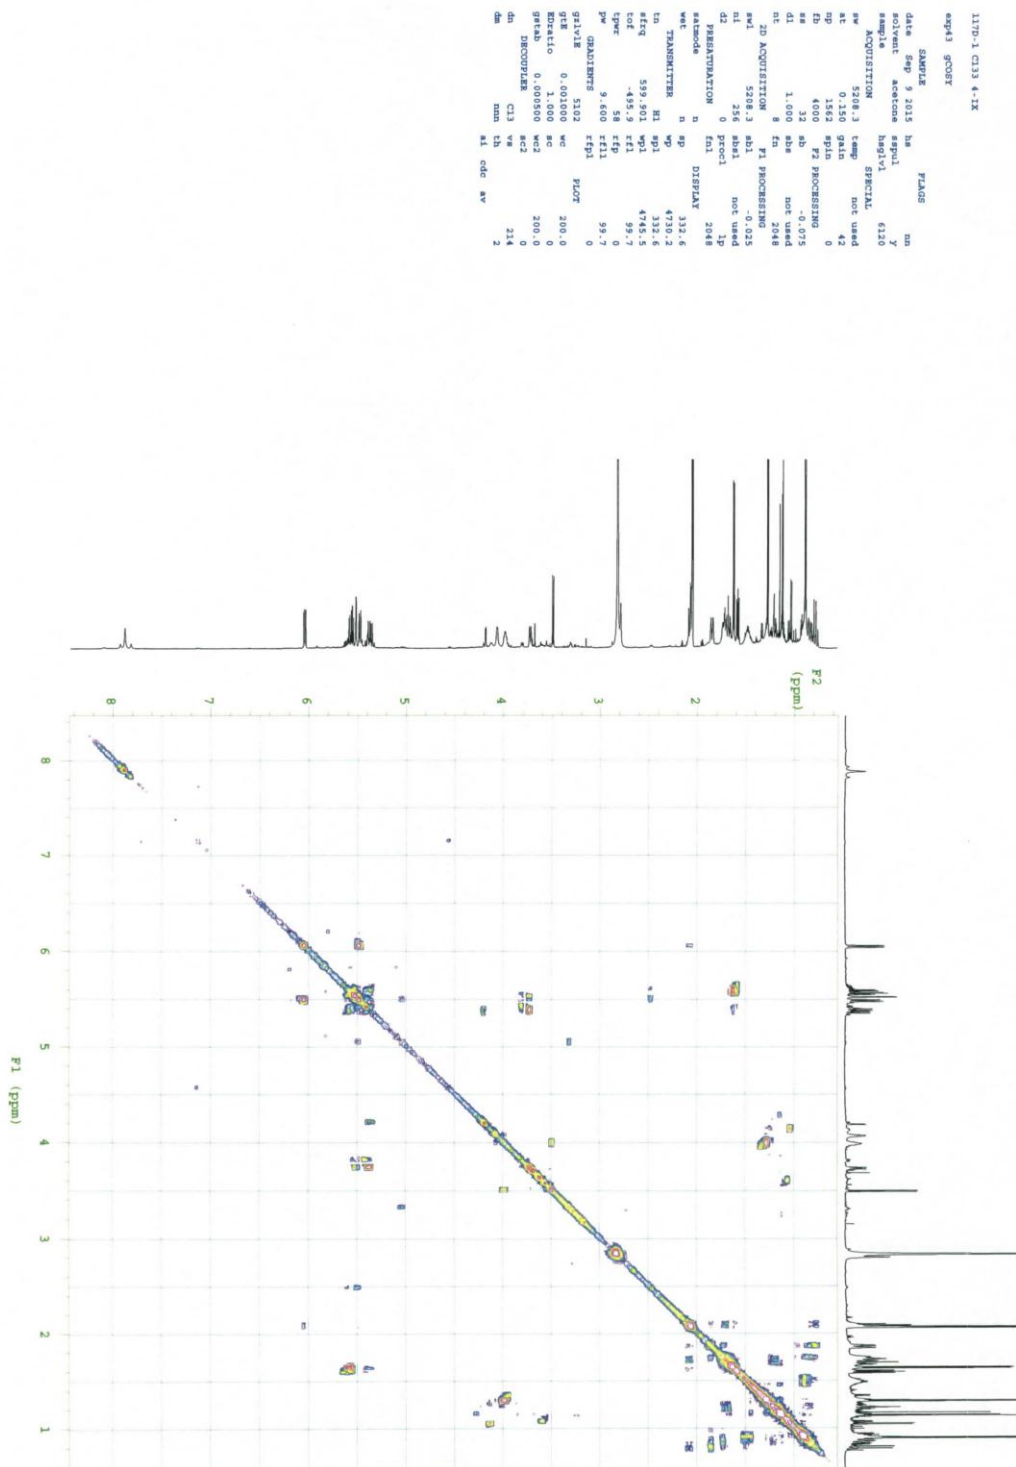



```

11TD-1-CL33 4-1X
exp43 300X

SAMPLE
date Sep 9 2015 ha nm
solvent acetone sepul y
sample hsg1v1 6120
ACQUISITION SPECIAL
av 5208.3 temp not used
at 0.150 gain 42
ap 1562 spin 0
fb 4000 F2 PROCESSING 0
pc 1513 ab 0.075
di 1.000 abv not used
nt 2048 fu 0
2D ACQUISITION F1 PROCESSING
av1 5208.3 ab1 -0.025
nl 256 abel not used
d1 0 p1c1 1p
PRESATURATION fml 2048
satmode n DISPLAY
wet n ap 347.8
TRANSMITTER n wp 1012.2
tu n ap1 342.8
pc n ap1 3581.9
tc n ap1 3581.9
lpc -495.8 rfi 35.7
lpcr -495.8 rfi 35.7
pw GRADIENTS 9.600 rfi 99.7
g1v1e 5102 rfi 0
g1e 0.001000 wc FLOT 250.0
g1e 1.000 ac 0
g1e 0.000500 wc2 200.0
DECOMPLER C13 va 0
dm nm th 214
at cdc mv 2

```

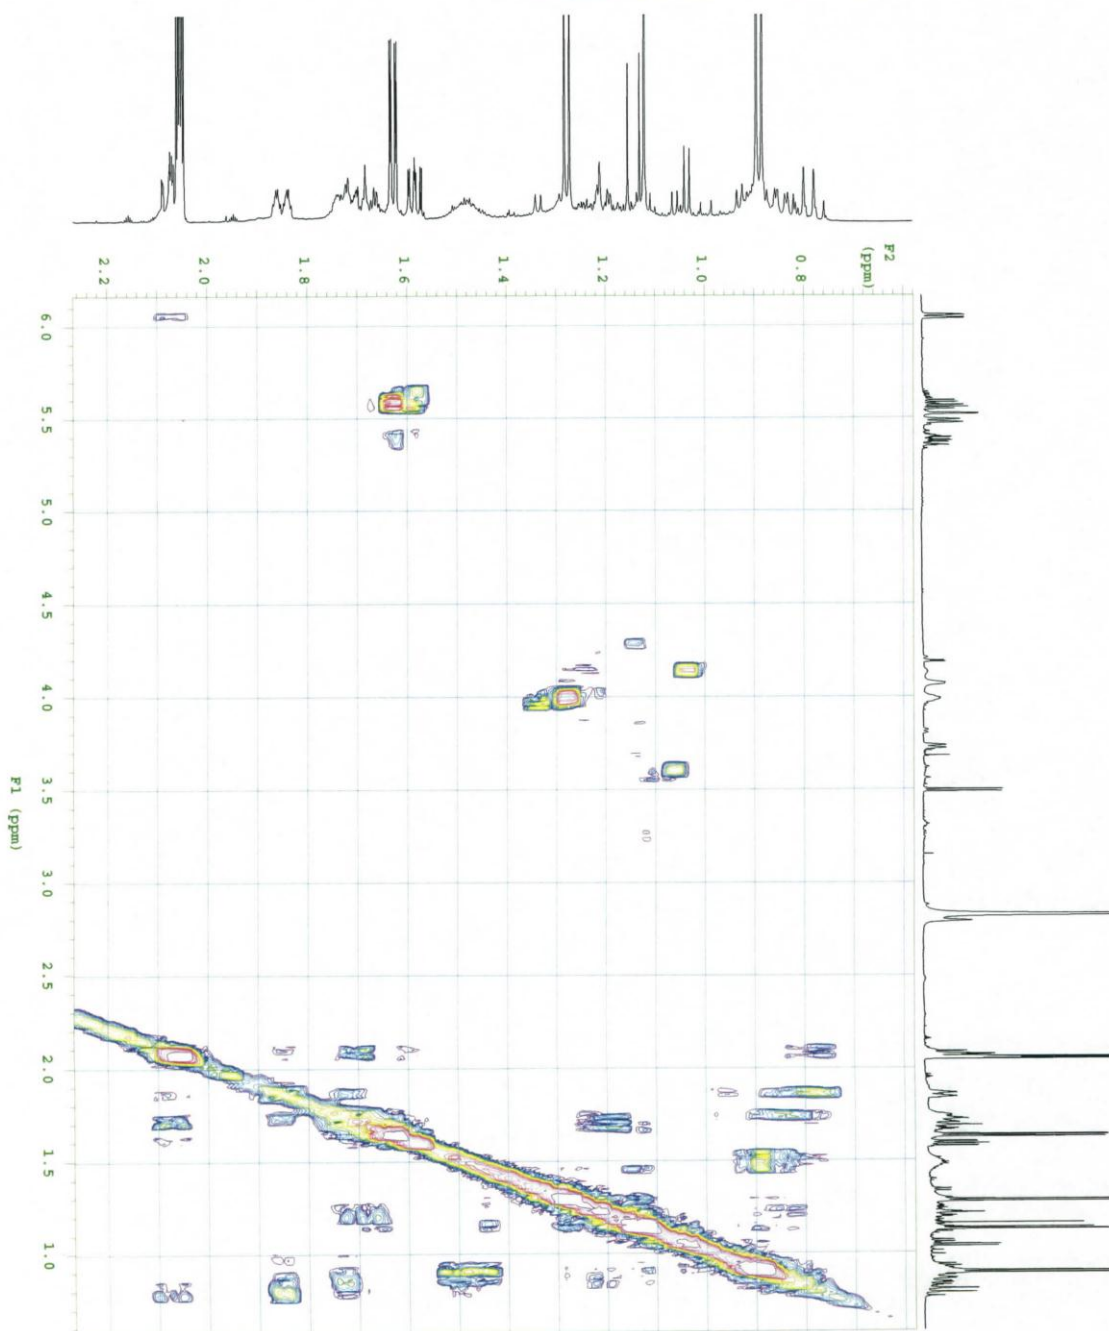

**Figure S21 NOESY of 4**

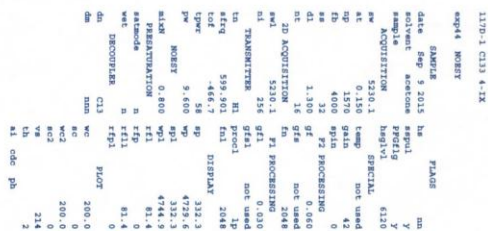

```

11TD-1 C133 4-IX
exp44 NOESTY

SAMPLE
date Sep 9 2015 ha
solvent acetone resol
sample y
ACQUISITION
sw 520.1 SPECIAL
at 0.150 temp not used
rp 1570 gain 42
fb 4000 spin 0
a 320 F2 PROCESSING 0
d1 1.310 gfe not used
nt 16 gfe not used
2D ACQUISITION
sw1 520.1 F1 PROCESSING
n1 256 gfe 0.030
tn TRANSMITTER n1 precl 1p
rfq 599.901 fml
lof -466.7 DISPLAY
cpw 58 ap 388.5
pw 9.600 wp 394.7
mix NOESTY 0.800 ap1 394.2
PRESATURATION n rfg 81.4
satmode n rfg 81.4
wet n rfg 81.4
DECOUPLE CL3 rfg1 0
dn nmw 200.0
wc ac 0
ac2 200.0
va ac2 0
v1 va 214
a1 cdc ph 2

```

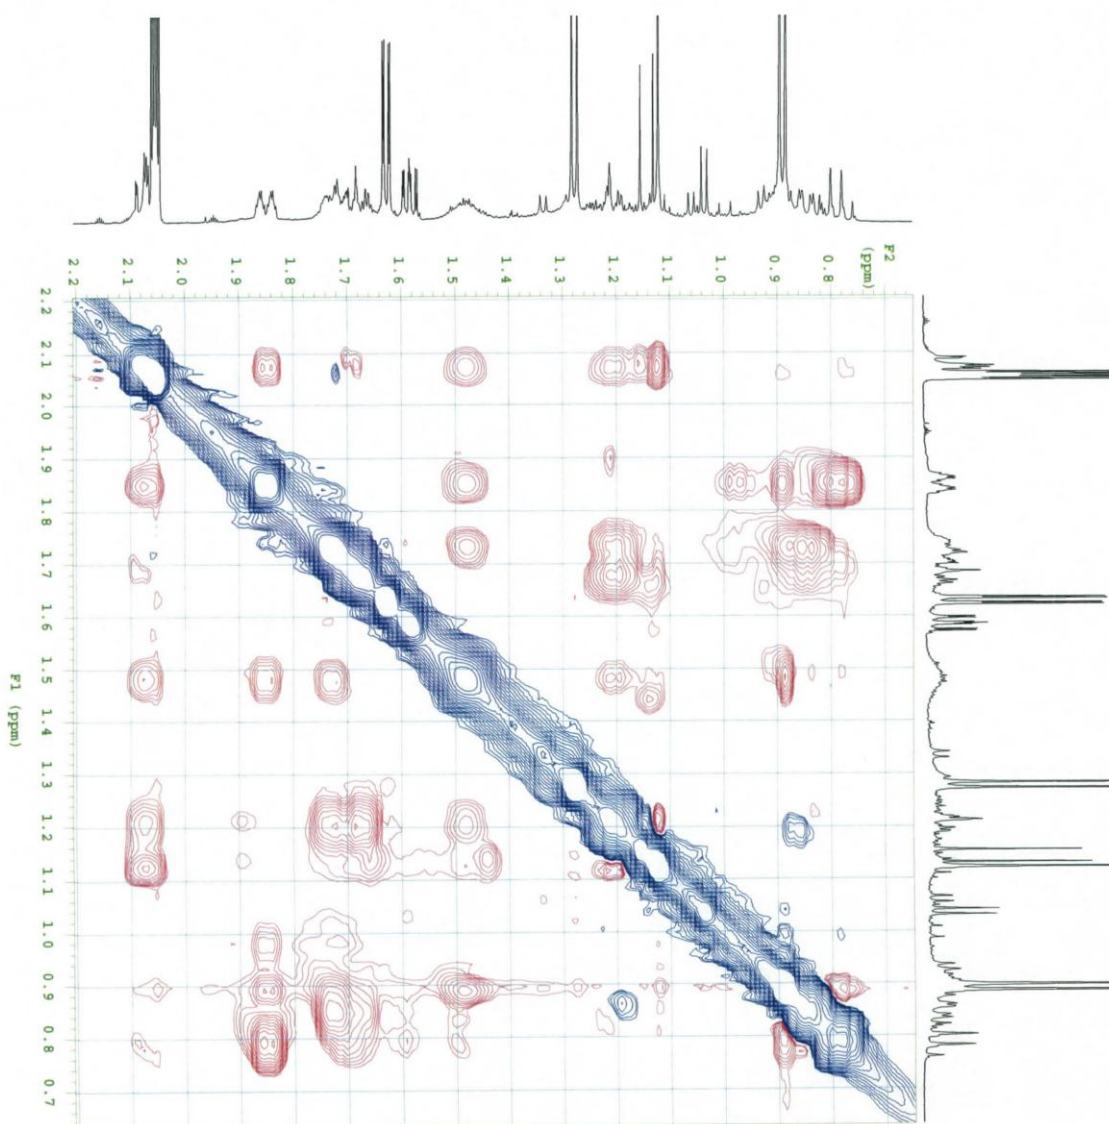

**Figure S22** HMQC of 4

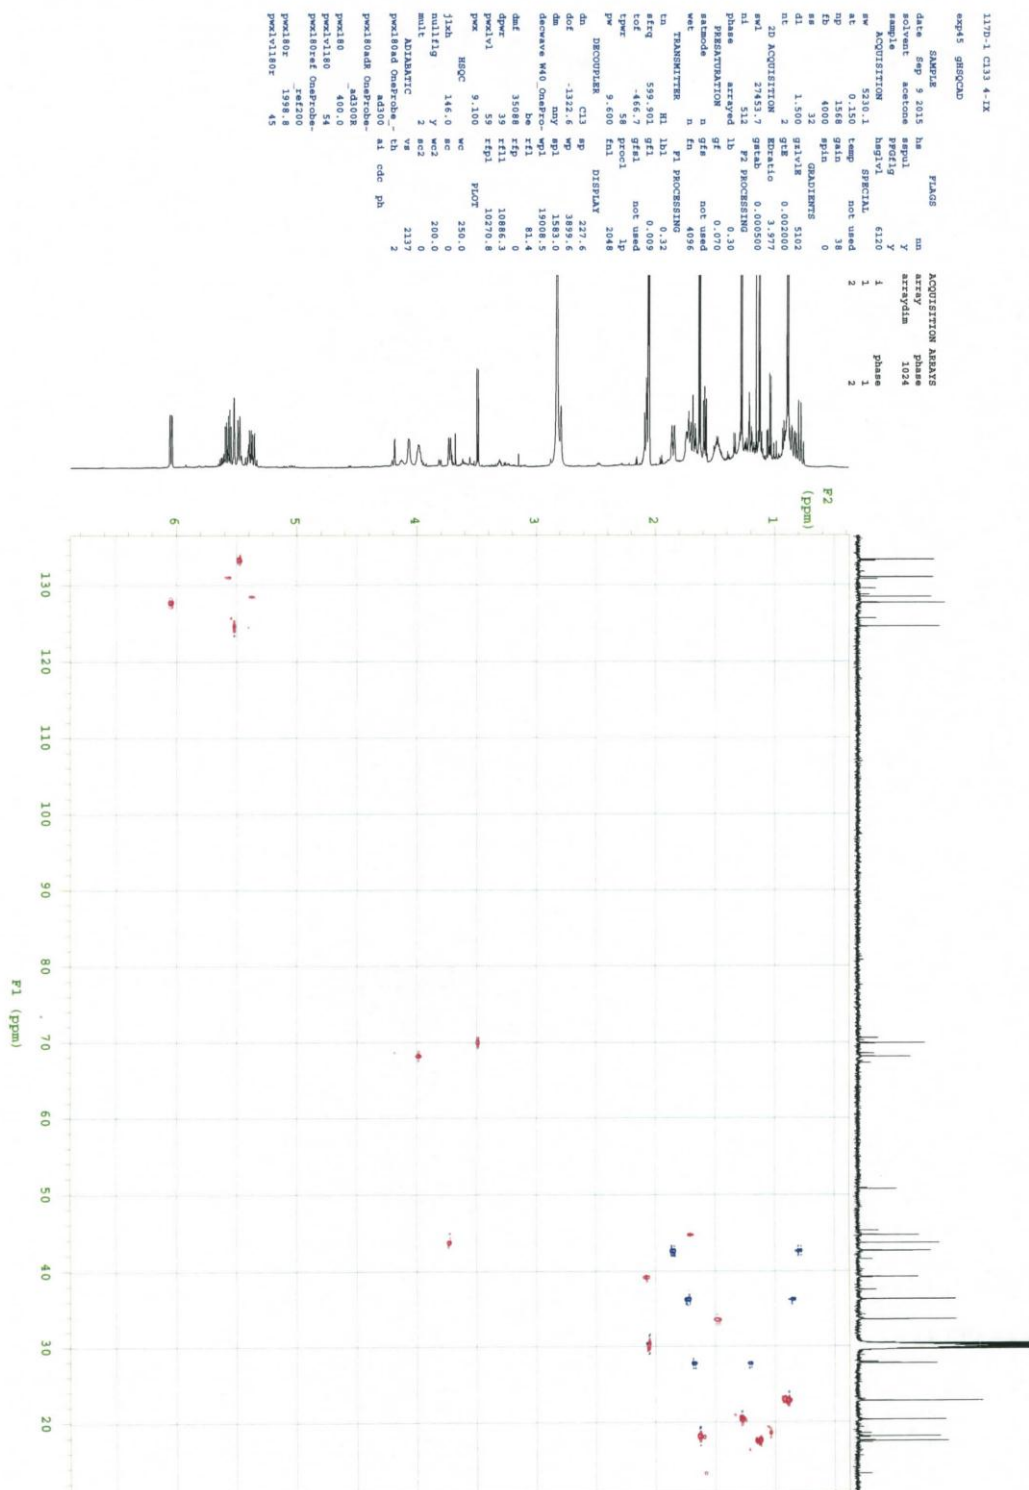

117D-1 CL33 4-1X  
exp45 gREGCMO

| SAMPLE         |            | FLAGS         |          | ACQUISITION ANALYSIS |       |
|----------------|------------|---------------|----------|----------------------|-------|
| date           | Sep 9 2015 | hs            | na       | array                | phase |
| solvent        | acetone    | suppl         | y        | arraydim             | 1024  |
| sample         |            | profig        | y        |                      |       |
| ACQUISITION    | hsplv1     | 6120          |          | phase                | 1     |
| sw             | 5210.1     | SPECIAL       |          |                      | 2     |
| at             | 0.150      | temp          | not used |                      |       |
| mp             | 1268       | gain          | 38       |                      |       |
| sd             | 4093       | spin          | 0        |                      |       |
| as             | 4093       | GRADIENTS     | 0        |                      |       |
| dl             | 1.500      | grv1x         | 5102     |                      |       |
| nt             | 2          | grv           | 0.002000 |                      |       |
| 2D ACQUISITION | 2          | Edratio       | 3.977    |                      |       |
| sw1            | 27453.7    | gateb         | 0.000500 |                      |       |
| nl             | 512        | F2 PROCESSING |          |                      |       |
| phase          | arrayed 1b | gr            | 0.30     |                      |       |
| PRESATURATION  | gr         | not used      |          |                      |       |
| satmode        | n          | gr            | 0.070    |                      |       |
| wet            | n          | fn            | 4096     |                      |       |
| TRANSMITTER    | h1         | F1 PROCESSING | 0.32     |                      |       |
| td             | 1.500      | grv1x         | 5102     |                      |       |
| afreq          | 599.901    | grf1          | 0.009    |                      |       |
| tot            | -466.7     | grf1          | not used |                      |       |
| lprc           | 58         | procl         | 1p       |                      |       |
| pw             | 9.600      | fn1           | 2048     |                      |       |
| DECOUPLER      | CL3        | sp            | 370.6    |                      |       |
| dn             | -1322.6    | wp            | 1066.2   |                      |       |
| da             | may        | sp1           | 1984.7   |                      |       |
| decouwa        | W40        | OnaPro-       | wp1      | 4959.9               |       |
| dec            | 35088      | rfp           | 81.4     |                      |       |
| qprc           | 1393       | rf1           | 10866.3  |                      |       |
| peakv1         | 59         | rfp1          | 10270.8  |                      |       |
| peak           | 9.100      | wc            | 280.0    |                      |       |
| nlh            | 146.0      | sc            | 0        |                      |       |
| nulling        | y          | wc2           | 200.0    |                      |       |
| mult           | 2          | sc2           | 0        |                      |       |
| ADJANATIC      | vs         |               | 2137     |                      |       |
| peak180a       | ad100      | ai            | cde      | ph                   | 2     |
| peak180a       | OnaPro-    |               |          |                      |       |
| peak180        | -ad100     |               |          |                      |       |
| peakv1180      | 4093       |               |          |                      |       |
| peak180a       | OnaPro-    |               |          |                      |       |
| peak180        | rf1200     |               |          |                      |       |
| peak180c       | 1398.8     |               |          |                      |       |
| peakv1180c     | 45         |               |          |                      |       |

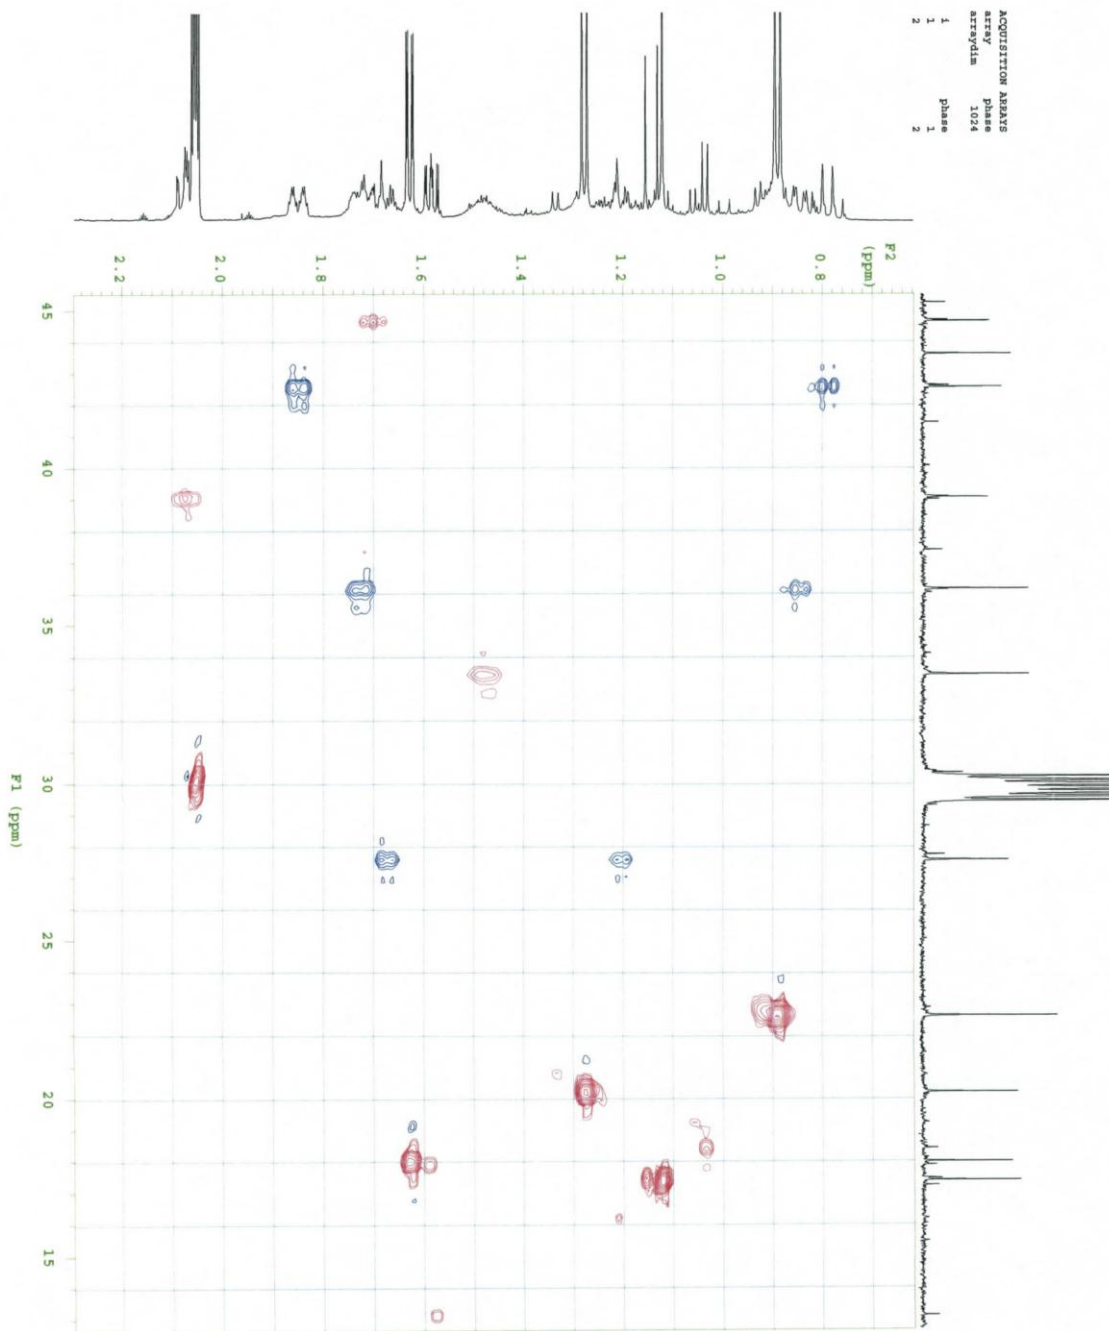



Figure S23 HMBC of 4

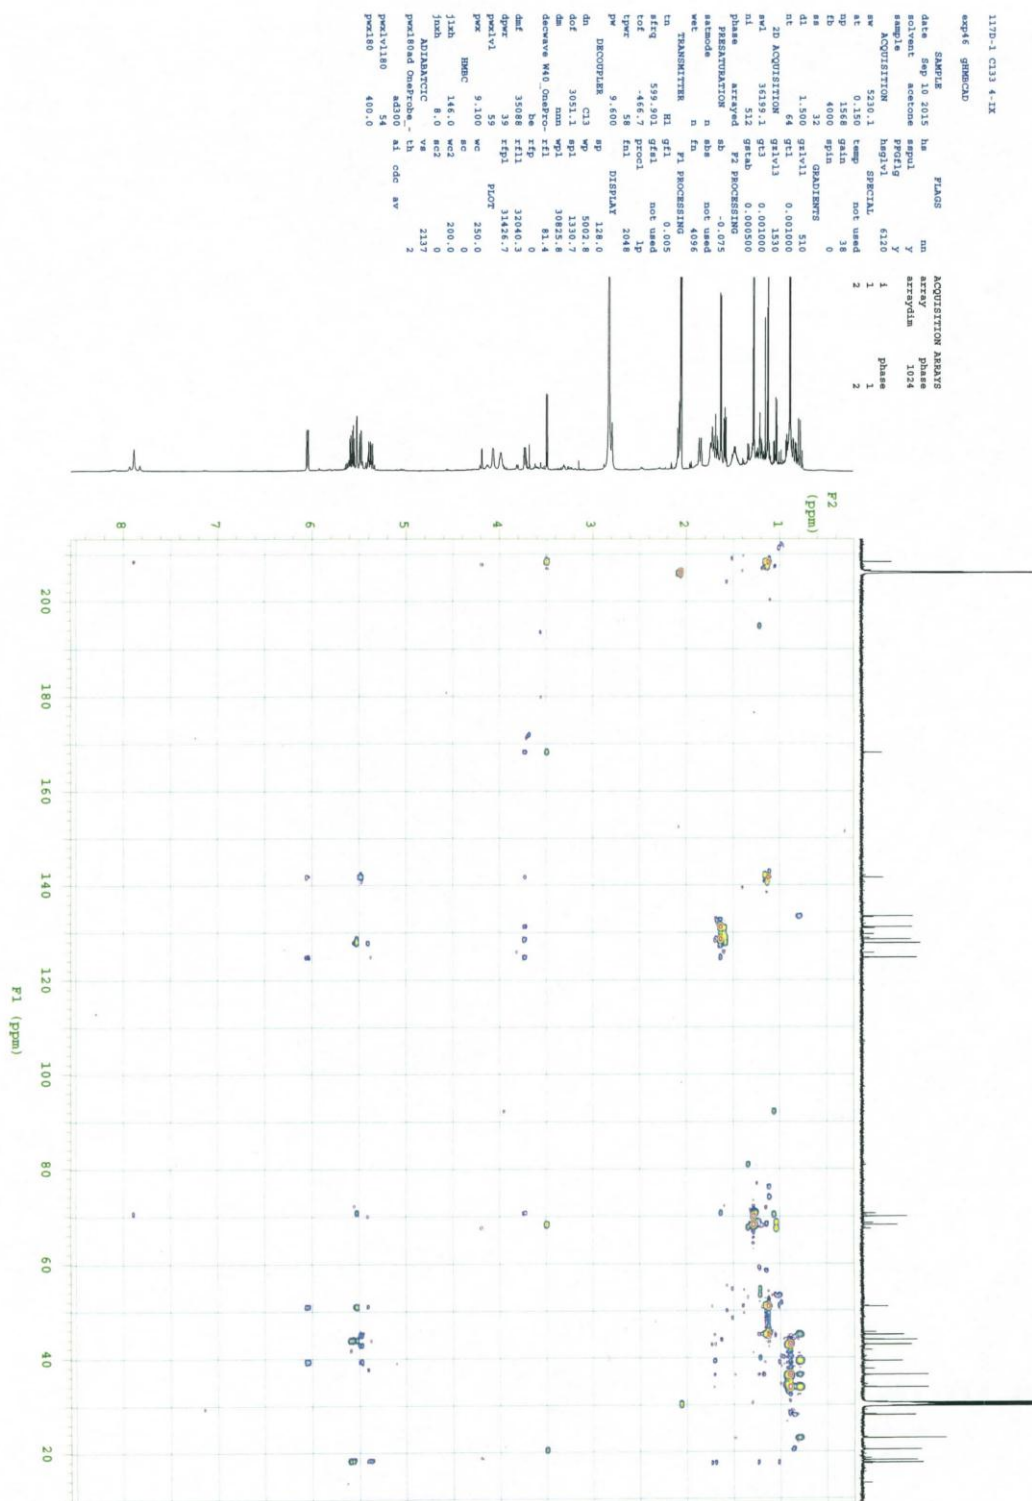

```

117D-1 C133 4-1X
exp46 gbmccao

SAMPLE          FLAGS
date Sep 10 2015   ha
solvent acetone    spul
sample            y
ACQUISITION      hsq1v1 6120
  av 5210.1 SPECIAL
  at 0.150 temp not used
  ap 1588 gain 38
  as 4083 spin 0
  ds 1.500 gtlv1 510
  nt 64 gtl 0.001000
  2D ACQUISITION gtlv13 1330
  w1 36199.1 gtl3 0.001000
  n1 512 gtlab 0.000500
  phase arrayed F2 PROCESSING
  PREPARATION ab -0.075
  astmode n ab not used
  wet n fn 4096
  1D TRANSMITTER n F1 PROCESSING
  to gtl 0.0005
  refq 599.901 gtl1 not used
  tot -466.7 pocol 1p
  lpr 58 fn1 DISPLAY 2048
  pw 9.600
  DECOUPLER sp 380.8
  dn C13 wp 978.1
  dof 3051.1 sp1 2320.5
  dn nm wp1 10145.6
  decouwa W40 OnePco-rl 81.4
  decf be rfp 32040.2
  decf 35088 rll 24466.7
  decf 35088 rfp1 24466.7
  pwk 9.100 wc FLOT 250.0
  jlab HMC 146.0 wc 200.0
  jlab ADIABATIC vs 2137
  pwk180ad OneProbe-1 ch 2
  pwk180ad ad100 at cdc av
  pwk180 400.0

```

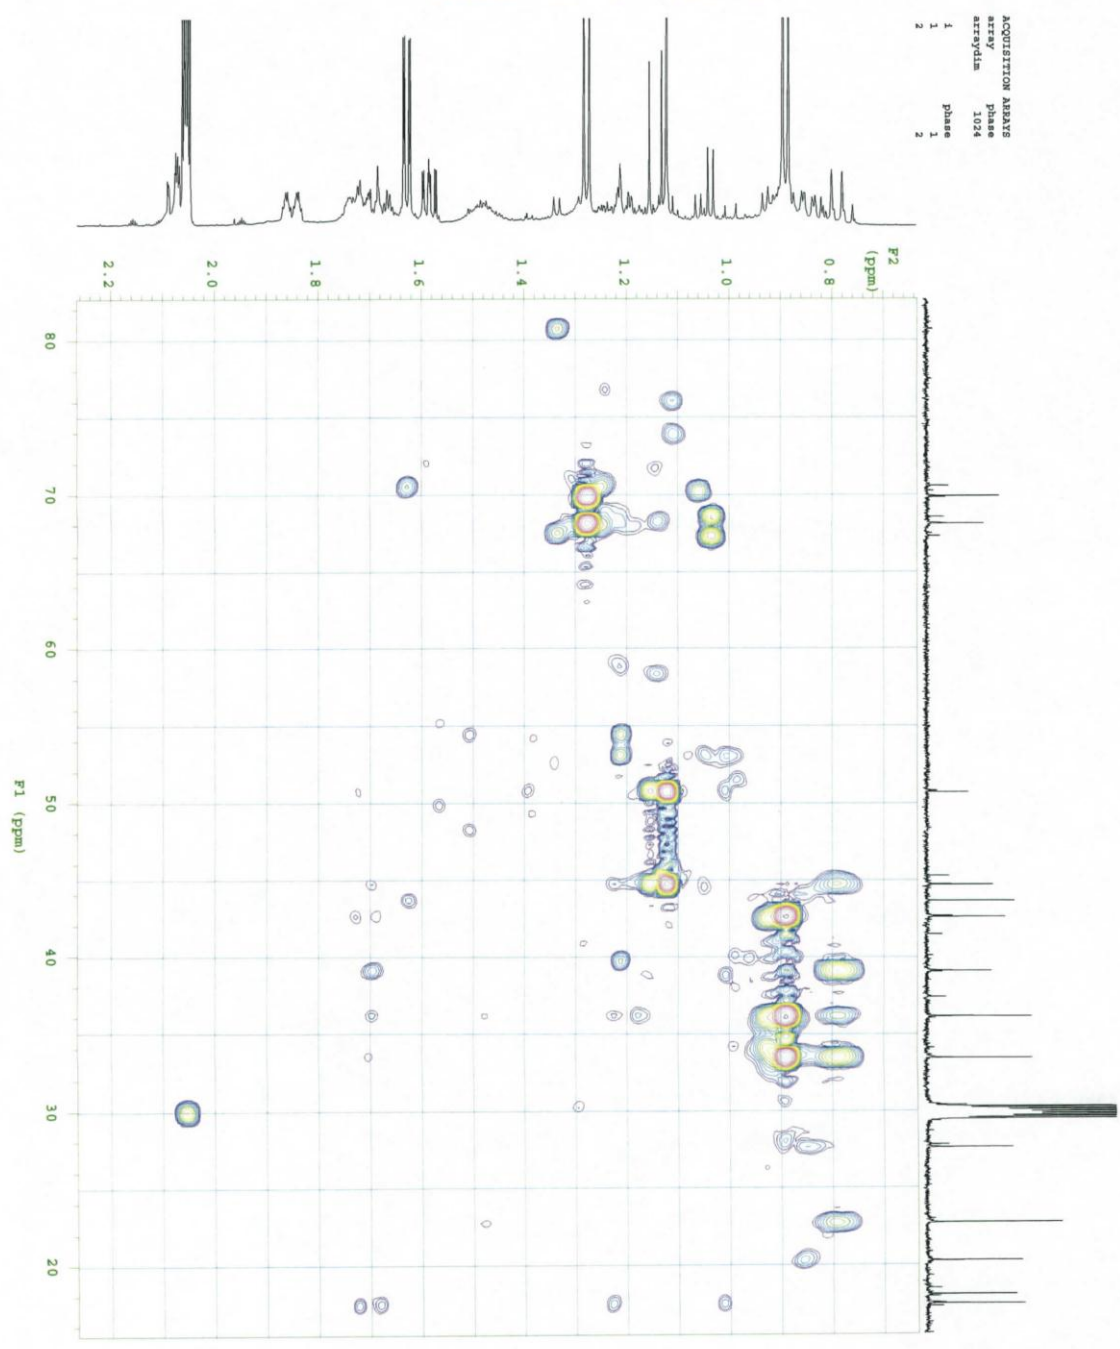

exp46 gnmvslab

ACQUISITION ARRAYS

|          |       |
|----------|-------|
| array    | phase |
| arraydim | 1024  |
| phase    | 1     |
|          | 2     |

F2  
(ppm)

0.8  
1.0  
1.2  
1.4  
1.6  
1.8  
2.0  
2.2



# Figure S24 FABMS of 4

[ Elemental Composition ]  
Data : 1601030  
Sample: 117D-1 C133-4-IX  
Note : Matrix; NBA  
Inlet : Direct  
RT : 7.66 min  
Elements : C 30/20, H 35/25, N 3/0, O 6/0  
Mass Tolerance : 20ppm, 1mmu if m/z > 50  
Unsaturation (U.S.) : -1.0 - 30.0

Date : 12-Jan-2016 16:47

Page: 1

Ion Mode : FAB+  
Scan#: (40,45)

| Observed m/z | Int%  | Err[ppm / mmu] | U.S. | Composition     |
|--------------|-------|----------------|------|-----------------|
| 398.2332     | 100.0 | +0.1 / +0.0    | 9.5  | C 24 H 32 N O 4 |

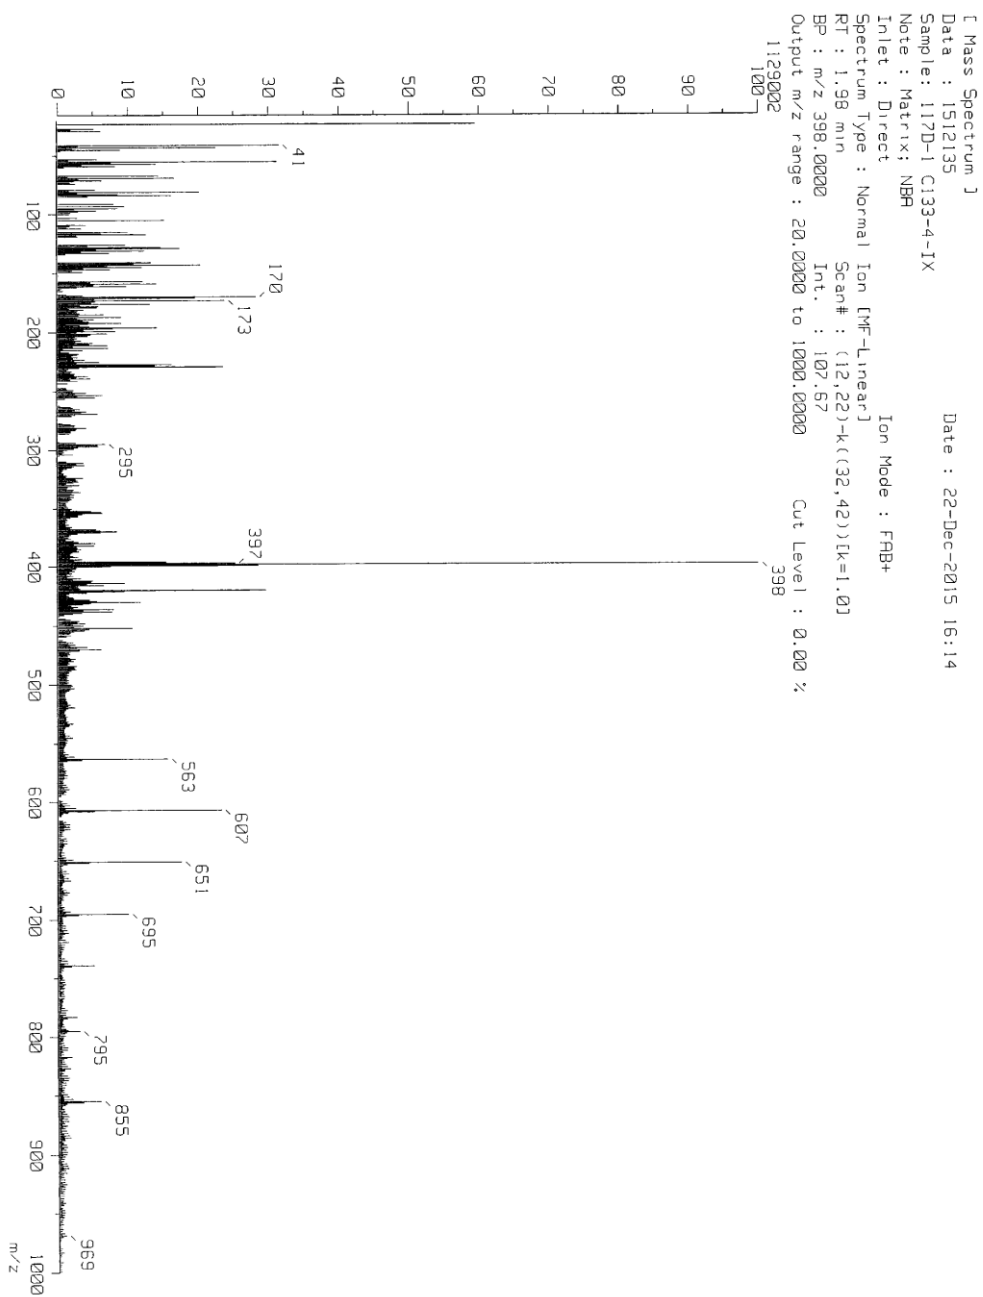

Supplement: s1 [file s1]
