# Supplementary material for: Altercrasins A–E, Decalin Derivatives, from a Sea-Urchin-Derived Alternaria sp.: Isolation and Structural Analysis Including Stereochemistry
Source: MDPI journal article supplement (doi:10.3390/md17040218), 2019-04-11

## Supplementary Materials

### Altercrasins A–E, decalin derivatives, from a sea-urchin-derived *Alternaria* sp.: Isolation and structural analysis including stereochemistry

Takeshi Yamada, Asumi Tanaka, Tatsuo Nehira, Takumi Nishii and Takashi Kikuchi

#### The Table of Contents

|            |                                                                                |    |
|------------|--------------------------------------------------------------------------------|----|
| Table S0   | Spectral data including 2D NMR data for 1                                      | 2  |
| Table S1   | Spectral data including 2D NMR data for 2                                      | 3  |
| Table S2   | Spectral data including 2D NMR data for 3                                      | 4  |
| Table S3   | Spectral data including 2D NMR data for 4                                      | 5  |
| Table S4   | Spectral data including 2D NMR data for 5                                      | 6  |
| Figure S1  | <sup>1</sup> H and <sup>13</sup> C NMR spectrum of 1 in acetone-d <sub>6</sub> | 7  |
| Figure S2  | <sup>1</sup> H- <sup>1</sup> H COSY of 1                                       | 13 |
| Figure S3  | NOESY of 1                                                                     | 15 |
| Figure S4  | HMQC of 1                                                                      | 17 |
| Figure S5  | HMBC of 1                                                                      | 19 |
| Figure S6  | FABMS of 1                                                                     | 23 |
| Figure S7  | <sup>1</sup> H and <sup>13</sup> C NMR spectrum of 2 in acetone-d <sub>6</sub> | 25 |
| Figure S8  | <sup>1</sup> H- <sup>1</sup> H COSY of 2                                       | 32 |
| Figure S9  | NOESY of 2                                                                     | 34 |
| Figure S10 | HMQC of 2                                                                      | 36 |
| Figure S11 | HMBC of 2                                                                      | 38 |
| Figure S12 | FABMS of 2                                                                     | 41 |
| Figure S13 | <sup>1</sup> H and <sup>13</sup> C NMR spectrum of 3 in acetone-d <sub>6</sub> | 43 |
| Figure S14 | <sup>1</sup> H- <sup>1</sup> H COSY of 3                                       | 50 |
| Figure S15 | NOESY of 3                                                                     | 52 |
| Figure S16 | HMQC of 3                                                                      | 54 |
| Figure S17 | HMBC of 3                                                                      | 56 |
| Figure S18 | FABMS of 3                                                                     | 59 |
| Figure S19 | <sup>1</sup> H and <sup>13</sup> C NMR spectrum of 4 in acetone-d <sub>6</sub> | 61 |
| Figure S20 | <sup>1</sup> H- <sup>1</sup> H COSY of 4                                       | 68 |

|                   |                                                                                                                    |           |
|-------------------|--------------------------------------------------------------------------------------------------------------------|-----------|
| <b>Figure S21</b> | <b>NOESY of 4</b>                                                                                                  | <b>70</b> |
| <b>Figure S22</b> | <b>HMQC of 4</b>                                                                                                   | <b>72</b> |
| <b>Figure S23</b> | <b>HMBC of 4</b>                                                                                                   | <b>74</b> |
| <b>Figure S24</b> | <b>FABMS of 4</b>                                                                                                  | <b>77</b> |
| <b>Figure S25</b> | <b><math>^1\text{H}</math> and <math>^{13}\text{C}</math> NMR spectrum of 5 in acetone-<math>\text{d}_6</math></b> | <b>79</b> |
| <b>Figure S26</b> | <b><math>^1\text{H}</math>-<math>^1\text{H}</math> COSY of 5</b>                                                   | <b>86</b> |
| <b>Figure S27</b> | <b>NOESY of 5</b>                                                                                                  | <b>88</b> |
| <b>Figure S28</b> | <b>HMQC of 5</b>                                                                                                   | <b>90</b> |
| <b>Figure S29</b> | <b>HMBC of 5</b>                                                                                                   | <b>92</b> |
| <b>Figure S30</b> | <b>FABMS of 5</b>                                                                                                  | <b>95</b> |

Table S0 NMR spectral data of **1** in acetone-*d*<sub>6</sub>

| Position   | $\delta_{\text{H}}^{\text{a}}$ |      | J/Hz                                                       | $^1\text{H}$ - $^1\text{H}$ COSY         | NOESY <sup>b</sup>                              | $\delta_{\text{C}}$ | HMBC (C) <sup>c</sup>    |
|------------|--------------------------------|------|------------------------------------------------------------|------------------------------------------|-------------------------------------------------|---------------------|--------------------------|
| 1 $\alpha$ | 1.55                           | dq   | 12.8 (1 $\beta$ ), 3.8 (2 $\alpha$ , 2 $\beta$ , 10)       | 1 $\beta$ , 2 $\alpha$ , 2 $\beta$ , 10  |                                                 | 25.9 (t)            | 2, 10                    |
| 1 $\beta$  | 1.12                           | qd   | 12.8 (1 $\alpha$ , 2 $\alpha$ , 10), 3.8 (2 $\beta$ )      | 1 $\alpha$ , 2 $\alpha$ , 10             | 3, 5, 24                                        |                     |                          |
| 2 $\alpha$ | 0.90                           | m    |                                                            | 1 $\alpha$ , 1 $\beta$ , 2 $\beta$ , 3   | 4 $\alpha$ , 10, 23                             | 36.0 (t)            |                          |
| 2 $\beta$  | 1.74                           | ddt  | 12.8 (2 $\alpha$ ), 5.3 (3), 3.8 (1 $\alpha$ , 1 $\beta$ ) | 1 $\alpha$ , 2 $\alpha$                  | 23                                              |                     |                          |
| 3          | 1.48                           | m    |                                                            | 2 $\alpha$ , 4 $\alpha$ , 4 $\beta$ , 23 | 1 $\beta$ , 5                                   | 33.5 (d)            |                          |
| 4 $\alpha$ | 0.82                           | q    | 12.8 (3, 4 $\beta$ , 5)                                    | 3, 4 $\beta$ , 5                         | 2 $\alpha$ , 10, 23                             | 42.6 (t)            | 2, 3, 5, 6, 10, 23       |
| 4 $\beta$  | 1.87                           | ddd  | 12.8 (4 $\alpha$ ), 5.5 (4), 3.2 (5)                       | 3, 4 $\alpha$ , 5                        | 6, 23                                           |                     |                          |
| 5          | 1.92                           | br t | 12.8 (4 $\alpha$ , 10)                                     | 4 $\alpha$ , 4 $\beta$ , 10              | 1 $\beta$ , 3, 24                               | 37.4 (d)            | 10                       |
| 6          | 5.55                           | d    | 11.3 (7)                                                   | 7                                        | 4 $\beta$                                       | 133.2 (d)           | 4, 5, 7, 8, 10           |
| 7          | 5.70                           | ddd  | 11.3 (6), 4.8 (8), 2.5                                     | 6, 8                                     |                                                 | 125.3 (d)           | 5, 6, 8, 13              |
| 8          | 2.65                           | ddt  | 11.8 (13), 4.8 (7), 1.8                                    | 7, 13                                    | 14, 24                                          | 49.9 (d)            | 6, 7, 9, 10, 13, 14, 24  |
| 9          |                                |      |                                                            |                                          |                                                 | 52.9 (s)            |                          |
| 10         | 1.49                           | td   | 12.8 (1 $\beta$ , 5), 3.8 (1 $\alpha$ )                    | 1 $\alpha$ , 1 $\beta$ , 5               | 2 $\alpha$ , 4 $\alpha$ , 13                    | 38.7 (d)            | 5, 24                    |
| 11         |                                |      |                                                            |                                          |                                                 | 211.6 (s)           |                          |
| 12         |                                |      |                                                            |                                          |                                                 | 74.0 (s)            |                          |
| 13         | 3.16                           | dd   | 11.8 (8), 9.0 (14)                                         | 8, 14                                    | 10, 15                                          | 52.8 (d)            | 7, 8, 12, 14, 15, 18, 22 |
| 14         | 5.62                           | ddd  | 15.5 (15), 9.0 (13), 1.8                                   | 13, 15                                   | 8, 16, 17, 19                                   | 124.3 (d)           | 8, 12, 13, 15, 16        |
| 15         | 5.73                           | dd   | 15.5 (14), 5.5 (16)                                        | 14, 16                                   | 13, 17                                          | 141.9 (d)           | 13, 14, 16, 17           |
| 16         | 4.21                           | m    |                                                            | 15, 17, 16-OH                            | 14                                              | 68.8 (d)            | 14                       |
| 17         | 1.16                           | d    | 6.8 (16)                                                   | 16                                       | 14, 15                                          | 24.2 (q)            | 15, 16                   |
| 18         |                                |      |                                                            |                                          |                                                 | 207.1 (s)           |                          |
| 19         | 3.66                           | d    | 7.0 (20)                                                   | 20                                       | 14, 21                                          | 70.4 (d)            | 18, 20, 21, 22           |
| 20         | 3.99                           | m    |                                                            | 19, 21, 20-OH                            | NH                                              | 67.8 (d)            | 18                       |
| 21         | 1.25                           | d    | 6.2 (20)                                                   | 20                                       | 19, NH                                          | 20.4 (q)            | 19, 20                   |
| 22         |                                |      |                                                            |                                          |                                                 | 170.7 (s)           |                          |
| 23         | 0.91                           | d    | 6.5 (3)                                                    | 3                                        | 2 $\alpha$ , 2 $\beta$ , 4 $\alpha$ , 4 $\beta$ | 22.6 (q)            | 2, 3, 4                  |
| 24         | 0.95                           | s    |                                                            |                                          | 1 $\beta$ , 5, 8                                | 16.0 (q)            | 8, 9, 10, 11             |
| 16-OH      | 3.79                           | d    | 5.0 (16)                                                   | 16                                       |                                                 |                     | 15, 16, 17               |
| 20-OH      | 4.17                           | d    | 5.5 (20)                                                   | 20                                       |                                                 |                     | 19                       |
| NH         | 8.01                           | br s |                                                            |                                          | 20, 21                                          |                     |                          |

<sup>a</sup>  $^1\text{H}$  chemical shift values ( $\delta$ ppm from SiMe<sub>4</sub>) followed by multiplicity and then the coupling constants (J/Hz). Figures in parentheses indicate the proton coupling with that position. <sup>b</sup> The correlations with geminal and vicinal protons are removed. <sup>c</sup> Long range  $^1\text{H}$ - $^{13}\text{C}$  correlations from H to C observed in the HMBC experiment.

Table S1 NMR spectral data of **2** in acetone-*d*<sub>6</sub>

| Position   | $\delta_{\text{H}}^{\text{a}}$ |      | J/Hz                                                       | $^1\text{H}$ - $^1\text{H}$ COSY | NOESY <sup>b</sup>                              | $\delta_{\text{C}}$ | HMBC (C) <sup>c</sup>    |
|------------|--------------------------------|------|------------------------------------------------------------|----------------------------------|-------------------------------------------------|---------------------|--------------------------|
| 1 $\alpha$ | 1.52                           | dq   | 13.2 (1 $\beta$ ), 3.6 (2 $\alpha$ , 2 $\beta$ , 10)       | 1 $\beta$ , 10                   |                                                 | 25.9 (t)            | 10                       |
| 1 $\beta$  | 1.13                           | qd   | 13.2 (1 $\alpha$ , 2 $\alpha$ , 10), 3.6 (2 $\beta$ )      | 1 $\alpha$                       | 3, 5, 24                                        |                     |                          |
| 2 $\alpha$ | 0.90                           | m    |                                                            | 2 $\beta$ , 3                    | 10, 23                                          | 36.0 (t)            |                          |
| 2 $\beta$  | 1.75                           | ddt  | 12.6 (2 $\alpha$ ), 5.4 (3), 3.6 (1 $\alpha$ , 1 $\beta$ ) | 2 $\alpha$                       | 23                                              |                     |                          |
| 3          | 1.49                           | m    |                                                            | 2 $\alpha$ , 4 $\alpha$ , 23     | 1 $\beta$ , 5                                   | 33.5 (d)            |                          |
| 4 $\alpha$ | 0.83                           | q    | 12.0 (3, 4 $\beta$ , 5)                                    | 3, 4 $\beta$ , 5                 | 10, 23                                          | 42.7 (t)            | 2, 3, 5, 6, 10, 23       |
| 4 $\beta$  | 1.88                           | ddd  | 12.0 (4 $\alpha$ ), 5.4 (3), 3.5 (5)                       | 4 $\alpha$ , 5                   | 6, 23                                           |                     |                          |
| 5          | 1.93                           | m    |                                                            | 4 $\alpha$ , 4 $\beta$ , 10      | 1 $\beta$ , 3, 24                               | 37.5 (d)            | 3, 6, 10                 |
| 6          | 5.54                           | d    | 10.2 (7)                                                   | 7                                | 4 $\beta$                                       | 132.9 (d)           | 4, 5, 7, 8, 10           |
| 7          | 5.69                           | ddd  | 10.2 (6), 4.8 (8), 2.4                                     | 6, 8                             |                                                 | 125.7 (d)           | 5, 8, 9                  |
| 8          | 2.74                           | ddt  | 12.0 (13), 4.8 (7), 1.8                                    | 7, 13                            | 14, 24                                          | 49.7 (d)            | 6, 7, 9, 10, 13, 14, 24  |
| 9          |                                |      |                                                            |                                  |                                                 | 52.9 (s)            |                          |
| 10         | 1.40                           | td   | 13.2 (1 $\alpha$ , 5), 3.0 (1 $\alpha$ )                   | 1 $\beta$ , 5                    | 2 $\alpha$ , 4 $\alpha$ , 13                    | 39.0 (d)            | 1, 24                    |
| 11         |                                |      |                                                            |                                  |                                                 | 211.7 (s)           |                          |
| 12         |                                |      |                                                            |                                  |                                                 | 74.2 (s)            |                          |
| 13         | 3.01                           | dd   | 12.0 (8), 9.0 (14)                                         | 8, 14                            | 10, 15                                          | 52.5 (d)            | 7, 8, 12, 14, 15, 18, 22 |
| 14         | 5.82                           | ddd  | 15.0 (15), 9.0 (13), 1.8                                   | 13, 15                           | 8, 16, 17, 19                                   | 125.5 (d)           | 8, 12, 13, 16            |
| 15         | 5.59                           | ddd  | 15.0 (14), 5.4 (16), 0.6                                   | 14, 16                           | 13, 17                                          | 140.8 (d)           | 13, 16, 17               |
| 16         | 4.17                           | m    |                                                            | 15, 17, 16-OH                    | 14, 20                                          | 68.0 (d)            | 14, 15, 17               |
| 17         | 1.14                           | d    | 6.6 (16)                                                   | 16                               | 14, 15                                          | 23.9 (q)            | 15, 16                   |
| 18         |                                |      |                                                            |                                  |                                                 | 207.8 (s)           |                          |
| 19         | 3.93                           | d    | 4.2 (20)                                                   | 20                               | 21, NH                                          | 69.7 (d)            | 18, 20, 21, 22           |
| 20         | 3.98                           | m    |                                                            | 19, 21                           | 16                                              | 67.4 (d)            |                          |
| 21         | 1.27                           | d    | 6.0 (20)                                                   | 20                               | 19, NH                                          | 20.7 (q)            | 19, 20                   |
| 22         |                                |      |                                                            |                                  |                                                 | 170.2 (s)           |                          |
| 23         | 0.92                           | d    | 6.6 (3)                                                    | 3                                | 2 $\alpha$ , 2 $\beta$ , 4 $\alpha$ , 4 $\beta$ | 22.6 (q)            | 2, 3, 4                  |
| 24         | 0.99                           | s    |                                                            |                                  | 1 $\beta$ , 5, 8                                | 16.1 (q)            | 8, 9, 10, 11             |
| 16-OH      | 3.47                           | br s |                                                            | 16                               |                                                 |                     |                          |
| 20-OH      | 4.02                           | br s |                                                            |                                  |                                                 |                     |                          |
| NH         | 8.02                           | br s |                                                            |                                  | 19, 21                                          |                     |                          |

<sup>a</sup>  $^1\text{H}$  chemical shift values ( $\delta$ ppm from SiMe<sub>4</sub>) followed by multiplicity and then the coupling constants (J/Hz). Figures in parentheses indicate the proton coupling with that position. <sup>b</sup> The correlations with geminal and vicinal protons are removed. <sup>c</sup> Long range  $^1\text{H}$ - $^{13}\text{C}$  correlations from H to C observed in the HMBC experiment.

Table S2 NMR spectral data of **3** in acetone-*d*<sub>6</sub>

| Position   | $\delta_{\text{H}}^{\text{a}}$ |      | J/Hz                                                       | $^1\text{H}$ - $^1\text{H}$ COSY         | NOESY <sup>b</sup>           | $\delta_{\text{C}}$ | HMBC (C) <sup>c</sup> |
|------------|--------------------------------|------|------------------------------------------------------------|------------------------------------------|------------------------------|---------------------|-----------------------|
| 1 $\alpha$ | 1.80                           | dq   | 12.6 (1 $\beta$ ), 3.6 (2 $\alpha$ , 2 $\beta$ , 10)       | 1 $\beta$ , 2 $\alpha$ , 10              |                              | 26.0 (t)            |                       |
| 1 $\beta$  | 1.20                           | qd   | 12.6 (1 $\alpha$ , 2 $\alpha$ , 10), 3.6 (2 $\beta$ )      | 1 $\alpha$ , 2 $\alpha$ , 2 $\beta$ , 10 | 3, 5, 24                     |                     | 2, 5, 10              |
| 2 $\alpha$ | 0.87                           | qd   | 12.6 (1 $\beta$ , 2 $\alpha$ , 3), 3.6 (1 $\alpha$ )       | 1 $\alpha$ , 1 $\beta$ , 2 $\beta$ , 3   | 10                           | 36.2 (t)            | 1, 3, 10, 23          |
| 2 $\beta$  | 1.74                           | ddt  | 12.6 (2 $\alpha$ ), 5.4 (3), 3.6 (1 $\alpha$ , 1 $\beta$ ) | 1 $\beta$ , 2 $\alpha$                   |                              |                     |                       |
| 3          | 1.49                           | m    |                                                            | 2 $\alpha$ , 23                          | 1 $\beta$ , 5                | 33.7 (d)            | 23                    |
| 4 $\alpha$ | 0.79                           | q    | 12.6 (3, 4 $\beta$ , 5)                                    | 4 $\beta$ , 5                            | 10, 23                       | 43.0 (t)            | 2, 3, 5, 6, 10, 23    |
| 4 $\beta$  | 1.87                           | ddd  | 12.6 (4 $\alpha$ ), 5.4 (3), 3.6 (5)                       | 4 $\alpha$ , 5                           | 6, 23                        |                     | 2, 5                  |
| 5          | 1.95                           | br t | 12.6 (4 $\alpha$ , 10)                                     | 4 $\alpha$ , 4 $\beta$ , 10              | 1 $\beta$ , 3, 24            | 37.5 (d)            | 4, 6                  |
| 6          | 5.57                           | d    | 9.6 (7)                                                    | 7                                        | 4 $\beta$                    | 133.1 (d)           | 4, 5, 8, 10           |
| 7          | 5.97                           | ddd  | 9.6 (6), 4.8 (8), 3.0                                      | 6, 8                                     | 14                           | 126.1 (d)           | 5, 8, 9               |
| 8          | 3.34                           | ddt  | 12.6 (13), 4.8 (7), 0.9                                    | 7, 13                                    | 24                           | 45.3 (d)            | 6, 7, 9, 10, 13, 24   |
| 9          |                                |      |                                                            |                                          |                              | 53.4 (s)            |                       |
| 10         | 1.35                           | td   | 12.6 (1 $\beta$ , 5), 3.6 (1 $\alpha$ )                    | 1 $\alpha$ , 1 $\beta$ , 5               | 2 $\alpha$ , 4 $\alpha$ , 13 | 40.4 (d)            | 5, 24                 |
| 11         |                                |      |                                                            |                                          |                              | 211.3 (s)           |                       |
| 12         |                                |      |                                                            |                                          |                              | 74.7 (s)            |                       |
| 13         | 2.83                           | ddd  | 12.6 (8), 5.4 (14), 2.4                                    | 8, 14                                    | 10, 17                       | 45.5 (d)            |                       |
| 14         | 6.42                           | ddd  | 8.4 (15), 5.4 (13), 2.4                                    | 13, 15                                   | 7                            | 133.6 (d)           | 8, 16                 |
| 15         | 5.83                           | ddd  | 8.4 (14), 5.4 (16), 2.4                                    | 14, 16                                   | 17                           | 134.3 (d)           | 13, 16, 17, 18        |
| 16         | 2.48                           | m    |                                                            | 15, 17                                   |                              | 43.7 (d)            | 14, 18                |
| 17         | 1.20                           | d    | 7.2 (16)                                                   | 16                                       | 13, 15                       | 15.3 (q)            | 15, 16, 18            |
| 18         |                                |      |                                                            |                                          |                              | 81.2 (s)            |                       |
| 19         |                                |      |                                                            |                                          |                              | 173.3 (d)           | 18, 20, 21, 22        |
| 22         |                                |      |                                                            |                                          |                              | 177.5 (s)           |                       |
| 23         | 0.89                           | d    | 6.6 (3)                                                    | 3                                        | 4 $\alpha$ , 4 $\beta$       | 22.8 (q)            | 2, 3, 4               |
| 24         | 1.05                           | s    |                                                            |                                          | 1 $\beta$ , 5, 8             | 17.3 (q)            | 8, 9, 10, 11          |

a  $^1\text{H}$  chemical shift values ( $\delta$  ppm from  $\text{SiMe}_4$ ) followed by multiplicity and then the coupling constants (J/Hz). Figures in parentheses indicate the proton coupling with that position. b The correlations with geminal and vicinal protons are removed. c Long range  $^1\text{H}$ - $^{13}\text{C}$  correlations from H to C observed in the HMBC experiment.

Table S3 NMR spectral data of **4** in acetone-*d*<sub>6</sub>

| Position   | $\delta_{\text{H}}^{\text{a}}$ |      | J/Hz                                                  | $^1\text{H}$ - $^1\text{H}$ COSY | NOESY <sup>b</sup>                              | $\delta_{\text{C}}$ | HMBC (C) <sup>c</sup> |
|------------|--------------------------------|------|-------------------------------------------------------|----------------------------------|-------------------------------------------------|---------------------|-----------------------|
| 1 $\alpha$ | 1.67                           | m    |                                                       | 1 $\beta$                        |                                                 | 27.6 (t)            |                       |
| 1 $\beta$  | 1.20                           | qd   | 12.6 (1 $\alpha$ , 2 $\alpha$ , 10), 3.6 (2 $\beta$ ) | 1 $\alpha$ , 2 $\beta$ , 10      | 5, 24                                           |                     |                       |
| 2 $\alpha$ | 0.85                           | qd   | 12.6 (1 $\beta$ , 2 $\beta$ , 3), 3.6 (1 $\alpha$ )   | 2 $\beta$ , 3                    | 23                                              | 36.1 (t)            | 1                     |
| 2 $\beta$  | 1.72                           | m    |                                                       | 2 $\alpha$                       | 23                                              |                     |                       |
| 3          | 1.49                           | m    |                                                       | 2 $\alpha$ , 23                  | 1 $\beta$ , 5                                   | 33.5 (d)            |                       |
| 4 $\alpha$ | 0.79                           | q    | 12.6 (3, 4 $\beta$ , 5)                               | 4 $\beta$ , 5                    | 10, 23                                          | 42.6 (t)            | 2, 3, 5, 10, 23       |
| 4 $\beta$  | 1.85                           | ddd  | 12.6 (4 $\alpha$ ), 5.4 (3), 3.6 (5)                  | 4 $\alpha$                       | 6, 23                                           |                     |                       |
| 5          | 2.08                           | m    |                                                       | 4 $\alpha$ , 10                  | 1 $\beta$ , 3, 24                               | 39.1 (d)            |                       |
| 6          | 5.48                           | d    | 10.2 (7)                                              | 7                                | 4 $\beta$                                       | 133.3 (d)           | 4, 5, 8, 10           |
| 7          | 6.04                           | dd   | 10.2 (6), 3.0                                         | 6                                | 14                                              | 127.7 (d)           | 5, 8, 9, 10           |
| 8          |                                |      |                                                       |                                  |                                                 | 141.5 (s)           |                       |
| 9          |                                |      |                                                       |                                  |                                                 | 50.7 (s)            |                       |
| 10         | 1.70                           | m    |                                                       | 1 $\beta$ , 5                    | 4 $\alpha$                                      | 44.7 (d)            | 5, 24                 |
| 11         |                                |      |                                                       |                                  |                                                 | 208.4 (s)           |                       |
| 12         |                                |      |                                                       |                                  |                                                 | 70.5 (s)            |                       |
| 13         | 3.71                           | d    | 9.6 (15)                                              | 14, 15                           | 16, 24                                          | 43.6 (d)            | 8, 12, 14, 15, 16, 22 |
| 14         | 5.52                           | d    | 1.8                                                   | 13                               | 7, 15                                           | 124.6 (d)           | 7, 9, 12, 13, 15      |
| 15         | 5.37                           | ddq  | 16.8 (16), 9.0 (13), 1.8                              | 13, 16                           | 14, 17                                          | 128.4 (d)           | 12, 16, 17            |
| 16         | 5.57                           | dq   | 16.8 (15), 6.6 (17)                                   | 15, 17                           | 13                                              | 131.0 (d)           | 13, 17                |
| 17         | 1.62                           | d    | 6.6 (16)                                              | 16                               | 15                                              | 18.0 (q)            | 15, 16                |
| 18         |                                |      |                                                       |                                  |                                                 | 208.4 (s)           |                       |
| 19         | 3.49                           | d    | 7.2 (20)                                              | 20                               | 21, NH                                          | 69.9 (d)            | 18, 20, 21, 22        |
| 20         | 3.99                           | m    |                                                       | 19, 21                           |                                                 | 68.1 (d)            |                       |
| 21         | 1.28                           | d    | 6.6 (20)                                              | 20                               | 19, NH                                          | 20.2 (q)            | 19, 20                |
| 22         |                                |      |                                                       |                                  |                                                 | 168.1 (s)           |                       |
| 23         | 0.89                           | d    | 6.6 (3)                                               | 3                                | 2 $\alpha$ , 2 $\beta$ , 4 $\alpha$ , 4 $\beta$ | 22.6 (q)            | 2, 3, 4               |
| 24         | 1.12                           | s    |                                                       |                                  | 1 $\beta$ , 5, 13                               | 17.4 (q)            | 8, 9, 10, 11          |
| 20-OH      | 4.06                           | br s |                                                       |                                  |                                                 |                     |                       |
| NH         | 7.88                           | br s |                                                       |                                  | 19, 21                                          |                     |                       |

<sup>a</sup>  $^1\text{H}$  chemical shift values ( $\delta$  ppm from SiMe<sub>4</sub>) followed by multiplicity and then the coupling constants (J/Hz). Figures in parentheses indicate the proton coupling with that position. <sup>b</sup> The correlations with geminal and vicinal protons are removed. <sup>c</sup> Long range  $^1\text{H}$ - $^{13}\text{C}$  correlations from H to C observed in the HMBC experiment.

Table S4 NMR spectral data of **5** in acetone-*d*<sub>6</sub>

| Position   | $\delta_{\text{H}}^{\text{a}}$ |      | J/Hz                                                       | $^1\text{H}$ - $^1\text{H}$ COSY | NOESY <sup>b</sup>                 | $\delta_{\text{C}}$ | HMBC (C) <sup>c</sup> |
|------------|--------------------------------|------|------------------------------------------------------------|----------------------------------|------------------------------------|---------------------|-----------------------|
| 1 $\alpha$ | 1.91                           | dq   | 12.6 (1 $\beta$ ), 3.6 (2 $\alpha$ , 2 $\beta$ , 10)       | 1 $\beta$                        |                                    | 28.0 (t)            | 9, 10                 |
| 1 $\beta$  | 1.20                           | qd   | 12.6 (1 $\alpha$ , 2 $\alpha$ , 10), 3.6 (2 $\beta$ )      | 1 $\alpha$                       | 3, 5                               |                     |                       |
| 2 $\alpha$ | 0.90                           | m    |                                                            | 2 $\beta$                        | 4 $\alpha$                         | 36.2 (t)            |                       |
| 2 $\beta$  | 1.73                           | ddt  | 11.4 (2 $\alpha$ ), 5.4 (3), 3.6 (1 $\alpha$ , 1 $\beta$ ) | 2 $\alpha$ , 3                   | 23                                 |                     |                       |
| 3          | 1.49                           | m    |                                                            | 2 $\beta$ , 23                   | 1 $\beta$ , 5                      | 33.5 (d)            |                       |
| 4 $\alpha$ | 0.80                           | q    | 12.0 (3, 4 $\beta$ , 5)                                    | 4 $\beta$                        | 2 $\alpha$ , 10, 23                | 42.9 (t)            | 2, 3, 5, 6, 10, 23    |
| 4 $\beta$  | 1.87                           | ddd  | 12.0 (4 $\alpha$ ), 5.8 (3), 3.5 (5)                       | 4 $\alpha$                       | 6, 23                              |                     |                       |
| 5          | 2.09                           | m    |                                                            | 10                               | 1 $\beta$ , 3, 24                  | 38.6 (d)            | 4, 6, 7               |
| 6          | 5.49                           | d    | 10.2 (7)                                                   | 7                                | 4 $\beta$                          | 133.5 (d)           | 4, 5, 8, 10           |
| 7          | 6.07                           | dd   | 10.2 (6), 3.0                                              | 6                                | 14                                 | 127.4 (d)           | 5, 8, 9, 14           |
| 8          |                                |      |                                                            |                                  |                                    | 140.1 (s)           |                       |
| 9          |                                |      |                                                            |                                  |                                    | 50.6 (s)            |                       |
| 10         | 1.37                           | td   | 12.6 (1 $\alpha$ , 5), 3.6 (1 $\alpha$ )                   | 5                                | 4 $\alpha$                         | 45.3 (d)            |                       |
| 11         |                                |      |                                                            |                                  |                                    | 205.2 (s)           |                       |
| 12         |                                |      |                                                            |                                  |                                    | 72.7 (s)            |                       |
| 13         | 3.96                           | d    | 9.0 (15)                                                   | 14, 15                           | 16, 24                             | 41.5 (d)            | 12, 14, 15, 16, 18    |
| 14         | 5.70                           | d    | 1.8                                                        | 13                               | 7                                  | 126.9 (d)           | 7, 9, 12, 13, 15      |
| 15         | 5.37                           | ddq  | 16.8 (16), 9.0 (13), 1.8                                   | 13, 16                           | 17                                 | 129.4 (d)           | 17                    |
| 16         | 5.62                           | dq   | 16.8 (15), 6.6 (17)                                        | 15, 17                           | 13                                 | 129.9 (d)           | 13, 17                |
| 17         | 1.59                           | d    | 6.6 (16)                                                   | 16                               | 15                                 | 17.9 (q)            | 15, 16                |
| 18         |                                |      |                                                            |                                  |                                    | 204.7 (s)           |                       |
| 19         | 3.81                           | d    | 4.8 (20)                                                   | 20                               | 21, NH                             | 68.9 (d)            | 18, 20, 21, 22        |
| 20         | 3.90                           | m    |                                                            | 19, 21                           |                                    | 67.0 (d)            |                       |
| 21         | 1.29                           | d    | 6.0 (20)                                                   | 20                               | 19, NH                             | 20.8 (q)            | 19, 20                |
| 22         |                                |      |                                                            |                                  |                                    | 170.7 (s)           |                       |
| 23         | 0.89                           | d    | 6.6 (3)                                                    | 3                                | 2 $\beta$ , 4 $\alpha$ , 4 $\beta$ | 22.6 (q)            | 2, 3, 4               |
| 24         | 1.12                           | s    |                                                            |                                  | 5, 13                              | 16.6 (q)            | 8, 9, 10, 11          |
| 20-OH      | 4.02                           | d    | 6.0 (20)                                                   |                                  |                                    |                     |                       |
| NH         | 7.86                           | br s |                                                            |                                  | 19, 21                             |                     |                       |

<sup>a</sup>  $^1\text{H}$  chemical shift values ( $\delta$  ppm from SiMe<sub>4</sub>) followed by multiplicity and then the coupling constants (J/Hz). Figures in parentheses indicate the proton coupling with that position. <sup>b</sup> The correlations with geminal and vicinal protons are removed. <sup>c</sup> Long range  $^1\text{H}$ - $^{13}\text{C}$  correlations from H to C observed in the HMBC experiment.

Figure S1  $^1\text{H}$  and  $^{13}\text{C}$  NMR spectrum of 1 in acetone- $\text{d}_6$

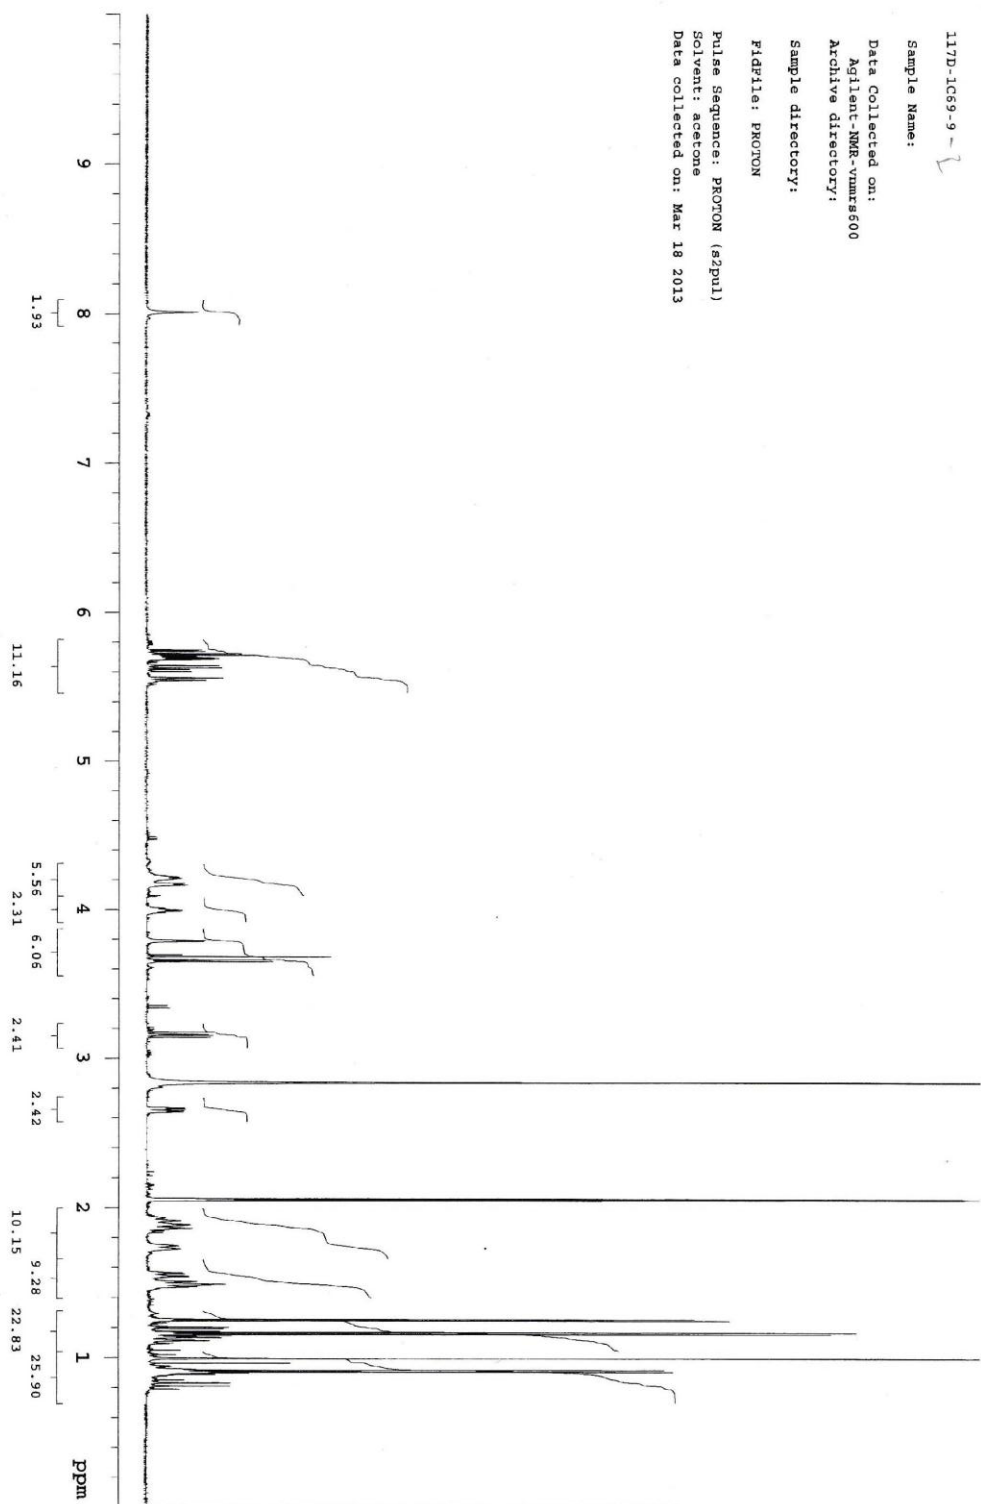



117D-1069-9

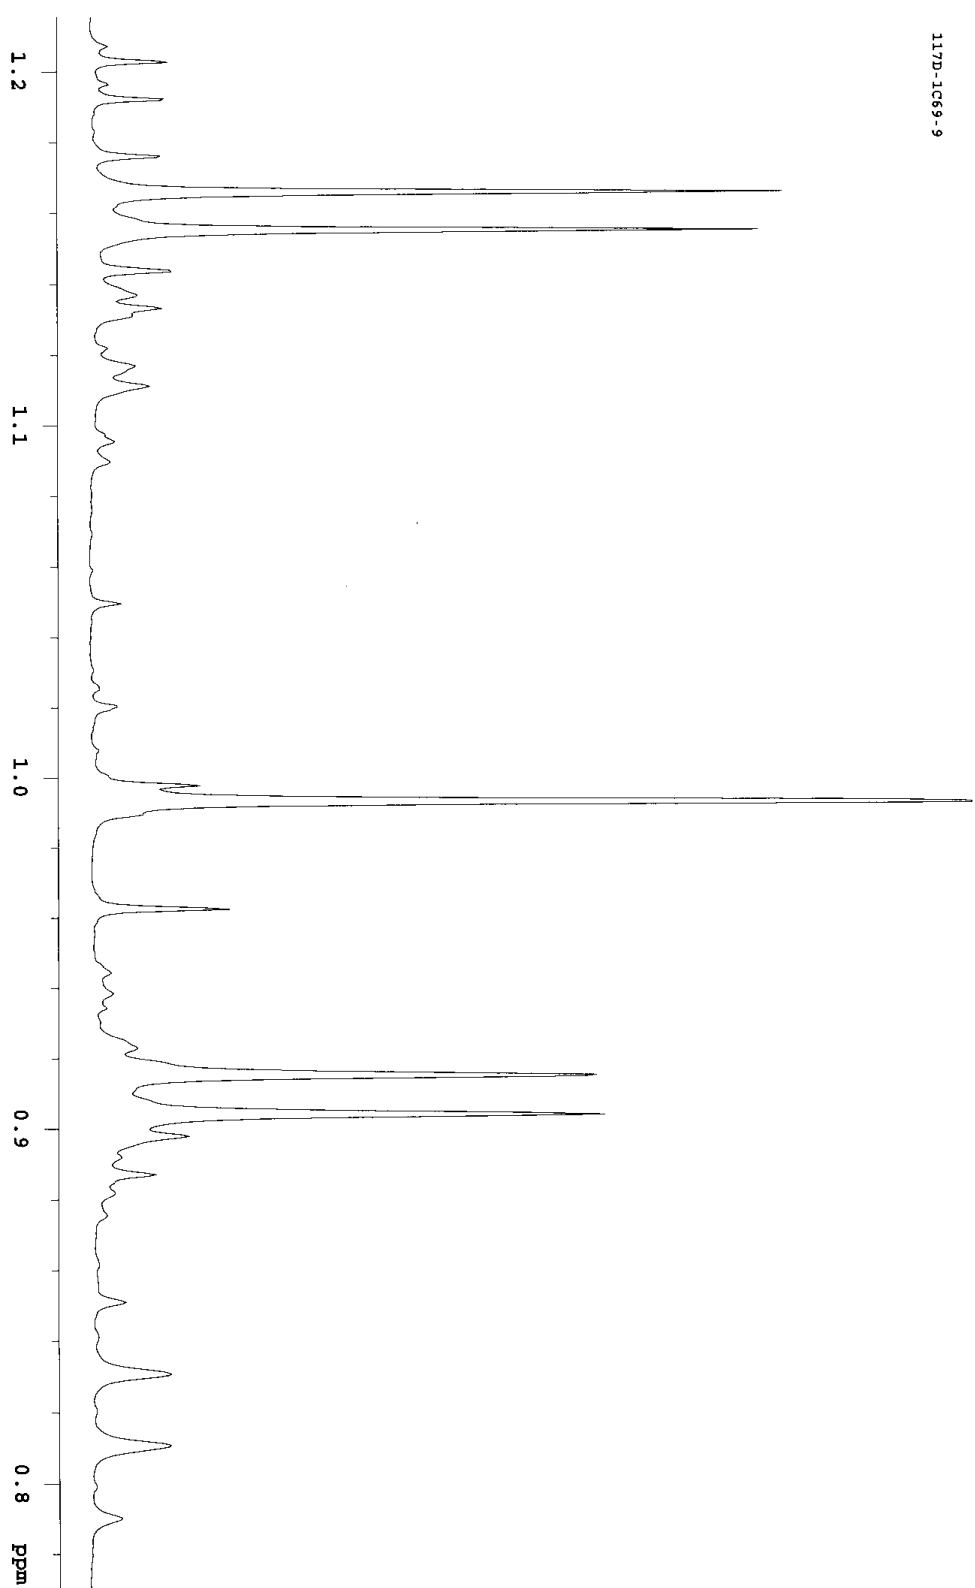

117D-1C69-9

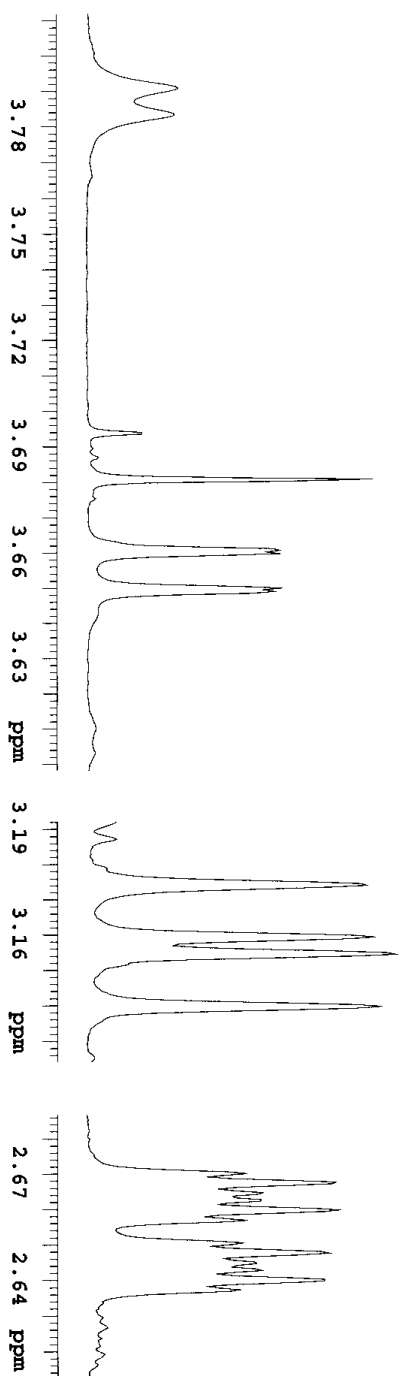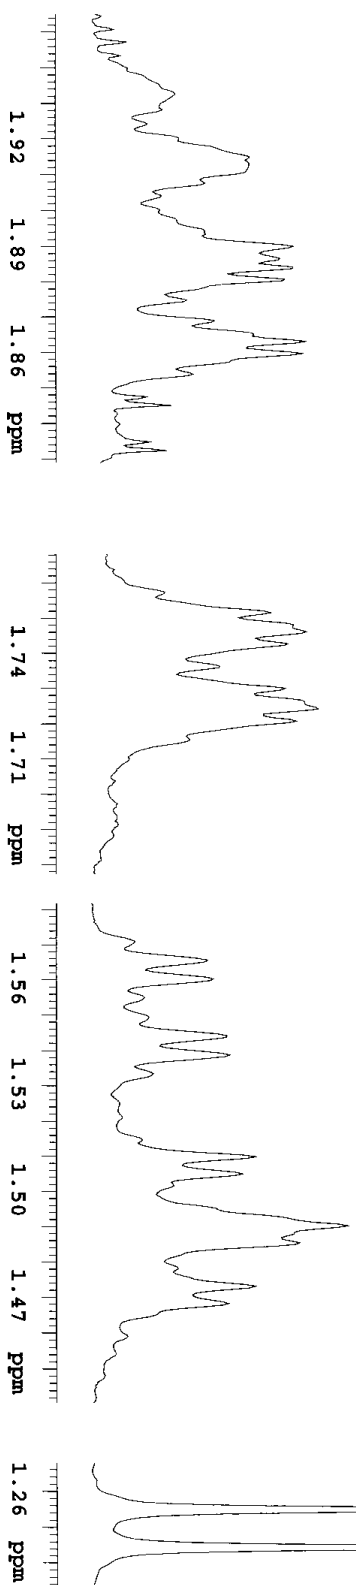

117D-1C63-9

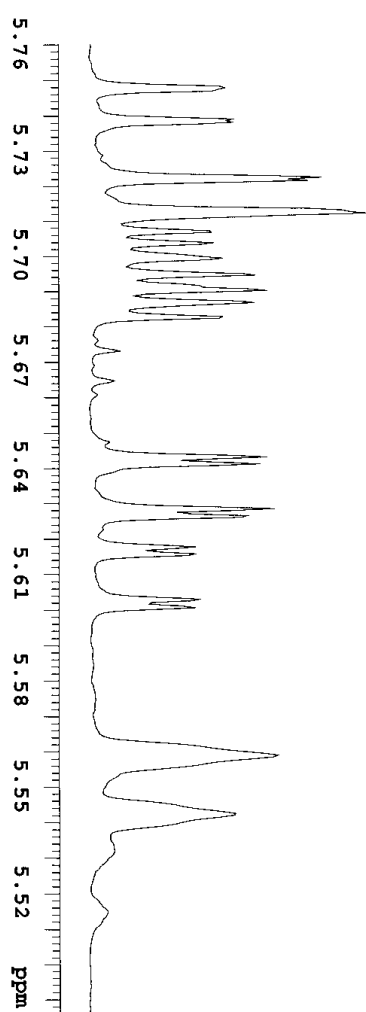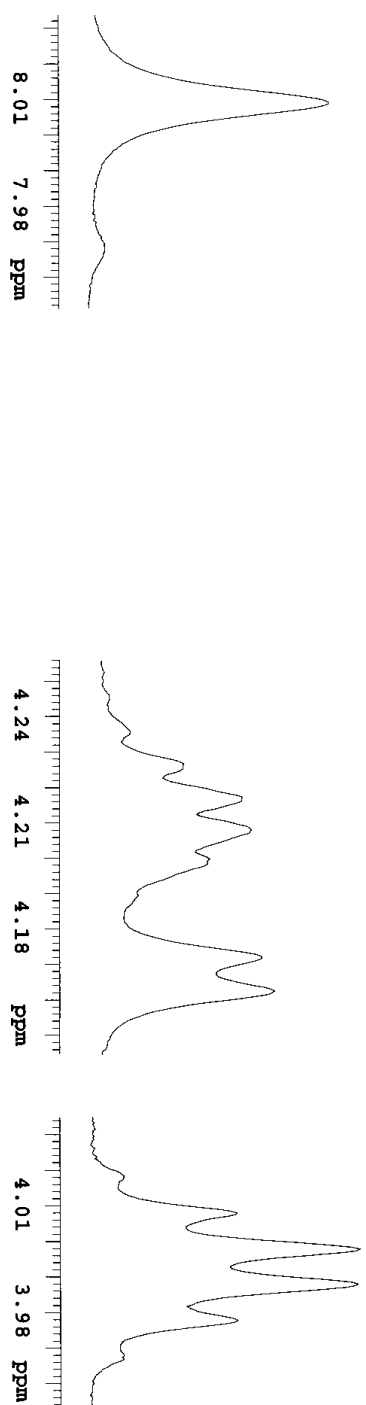

117D-1C89-9

Sample Name:

Data Collected on:

Agilent-NMR-vnmr600

Archive directory:

Sample directory:

FIDFile: CARBON

Pulse Sequence: CARBON (s2pul)

Solvent: acetone

Data collected on: Mar 18 2013

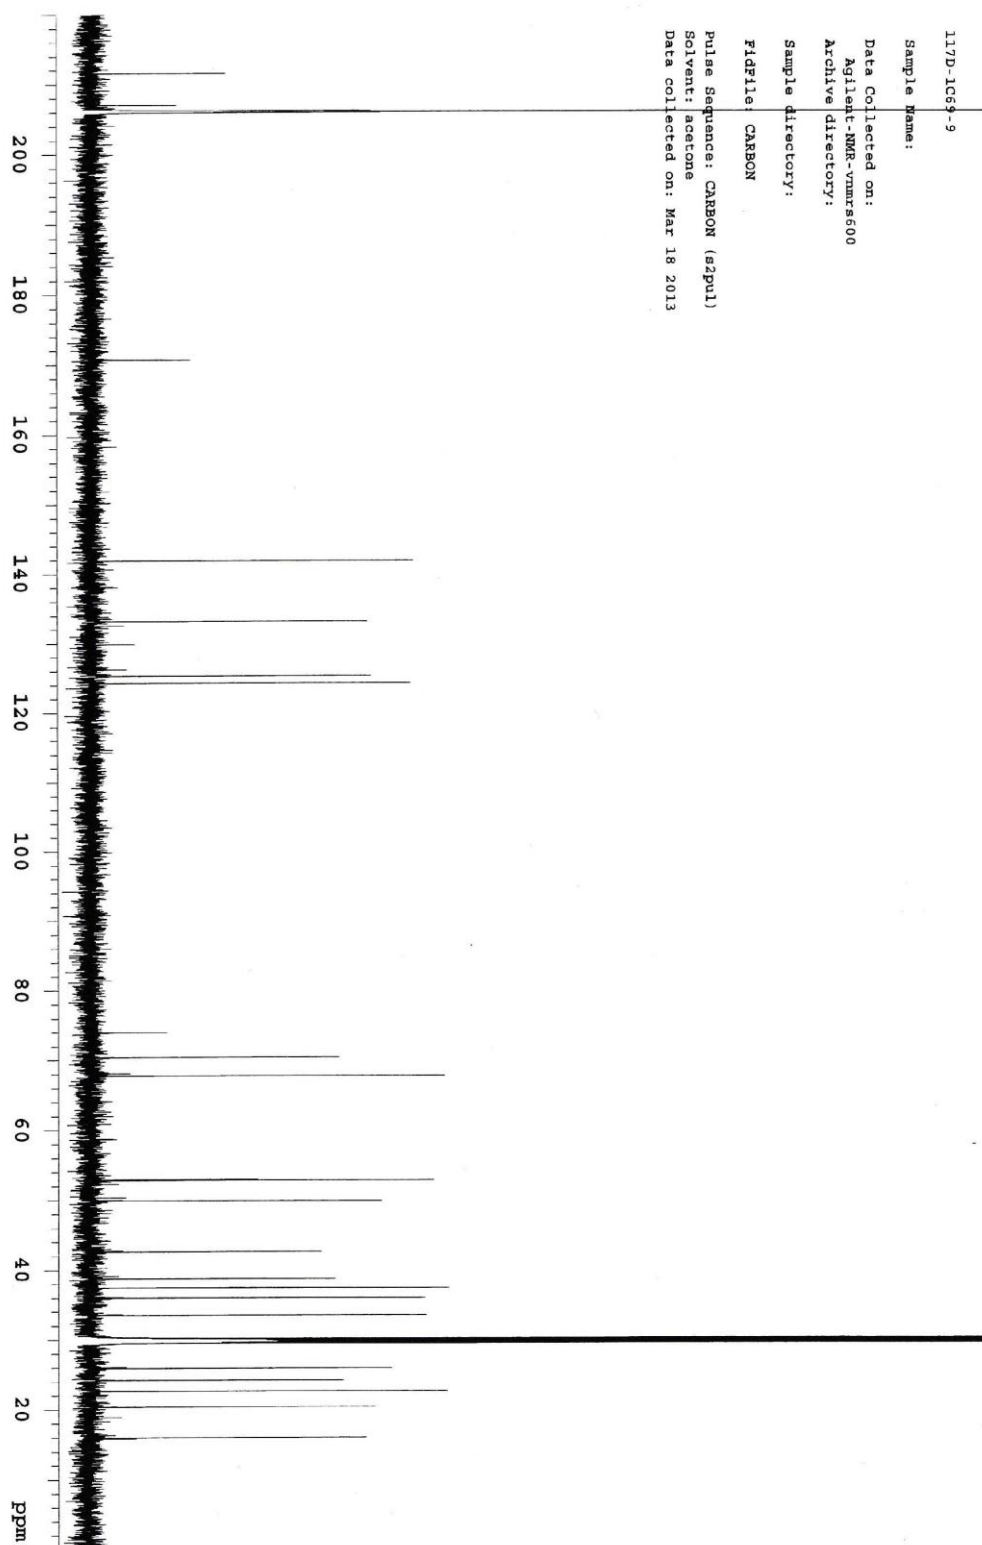

117D-1C69-9

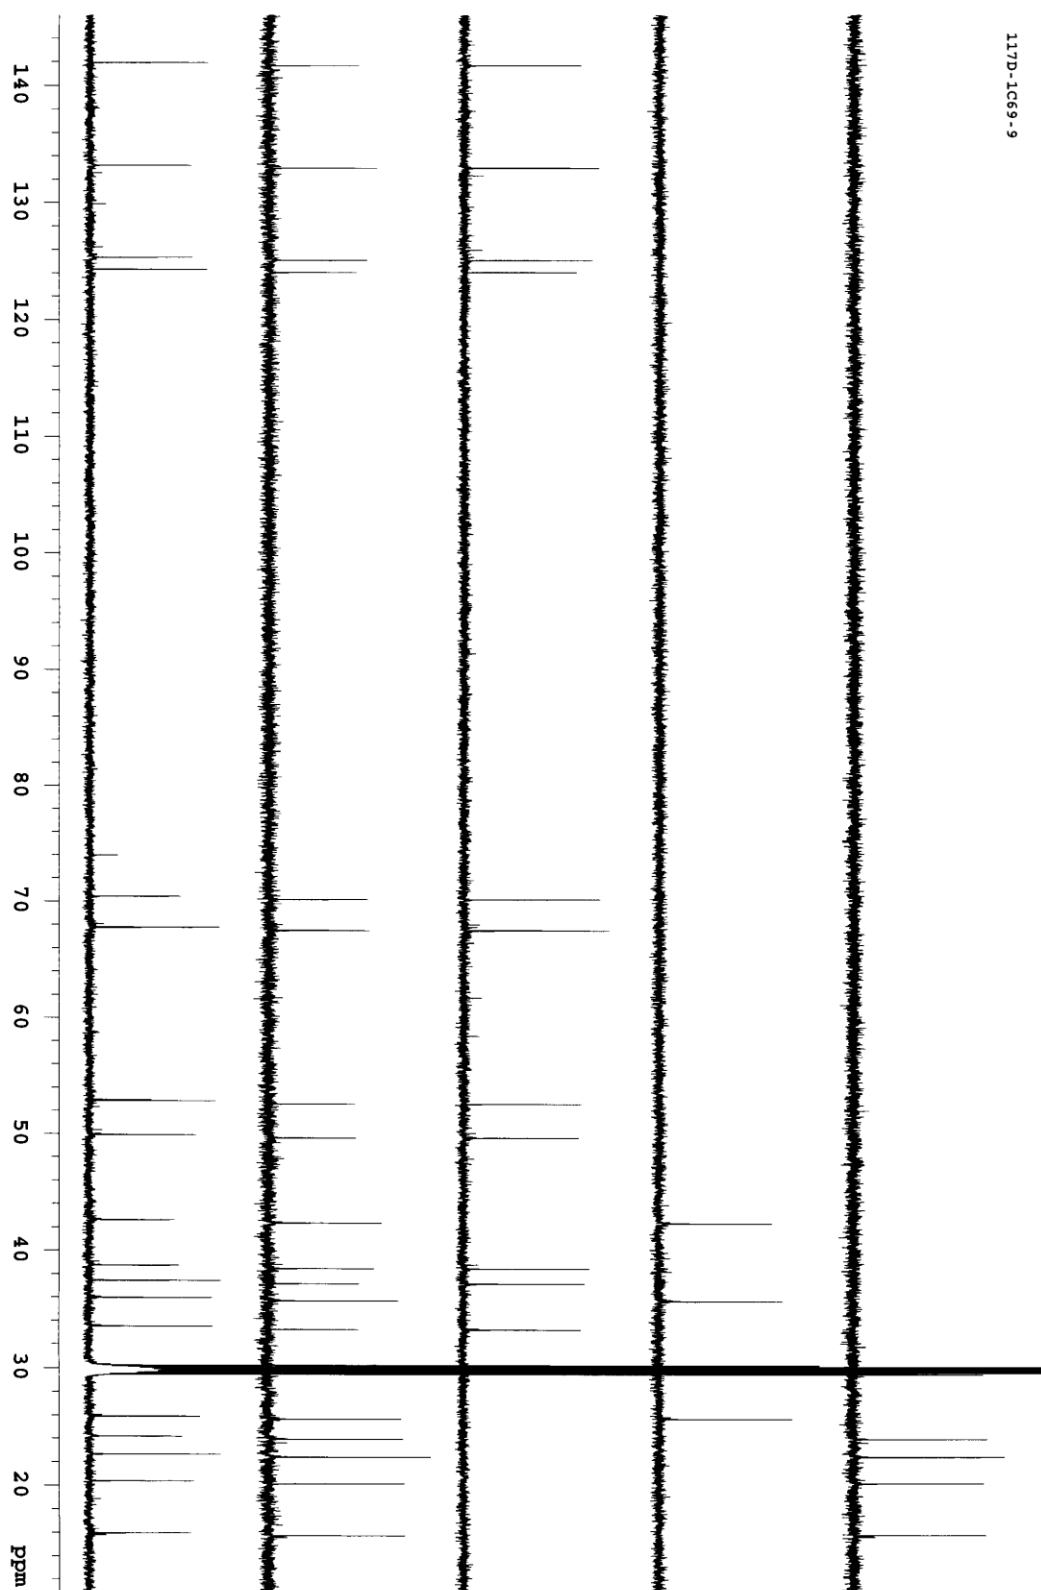

Figure S2  $^1\text{H}$ - $^1\text{H}$  COSY of 1

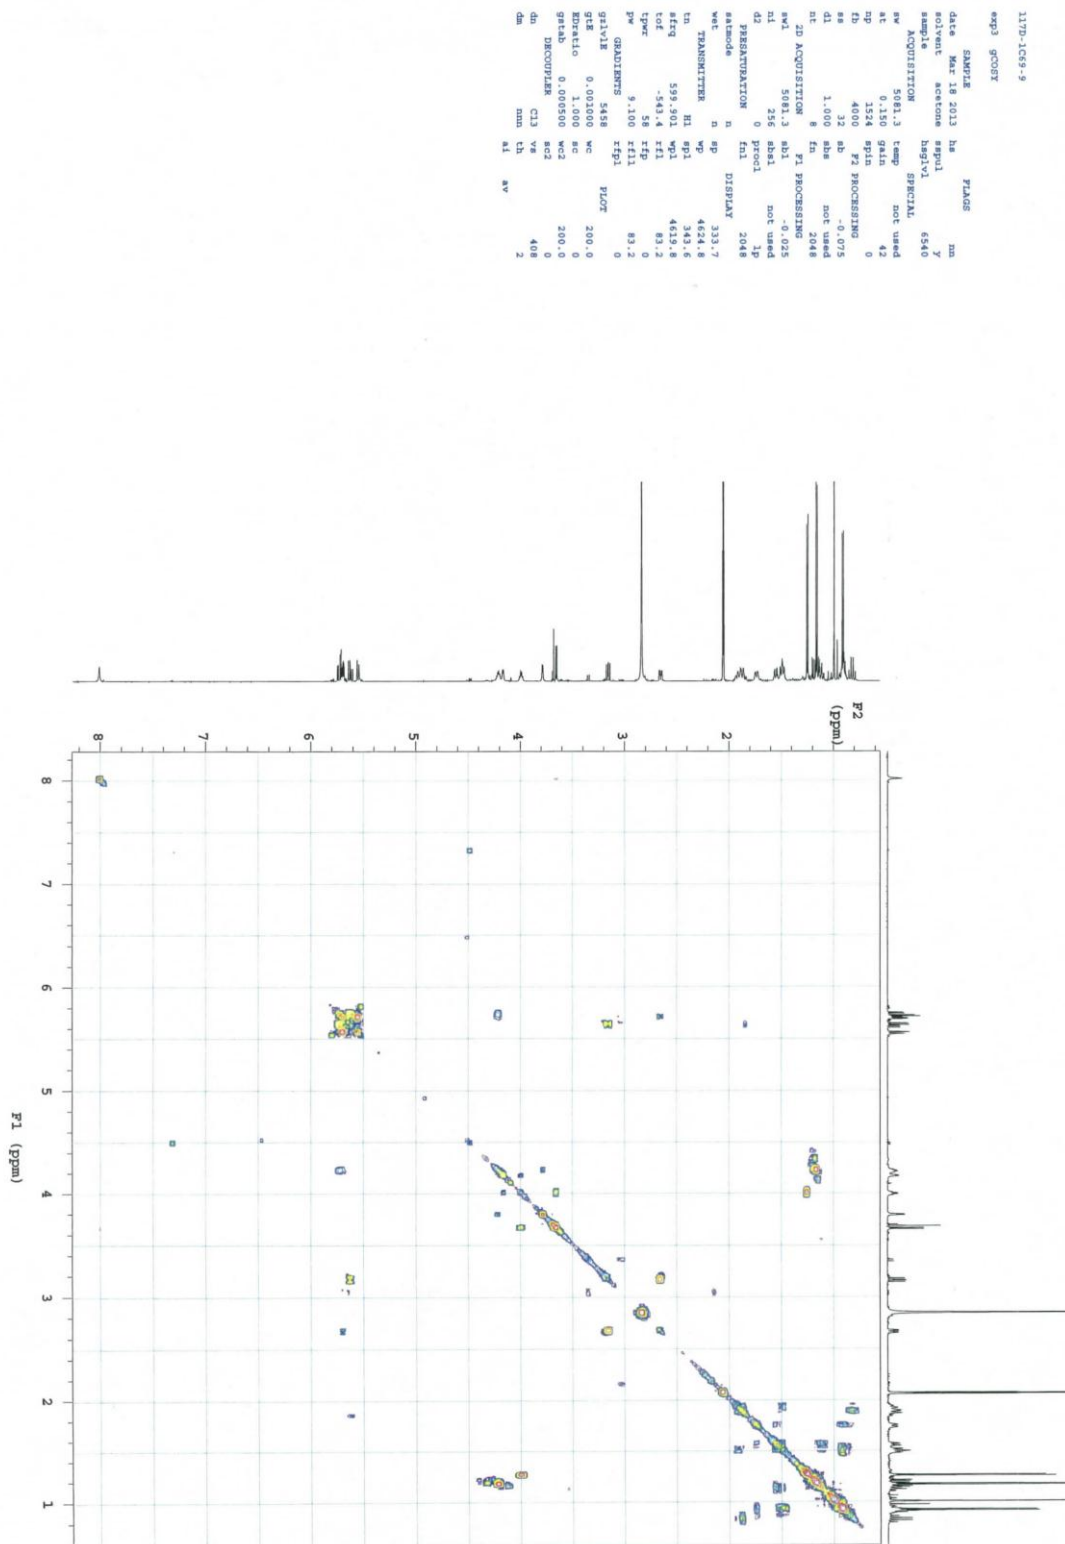

117D-1069-9  
expt3 gcosy

| SAMPLE         |              | FLAGS         |          |
|----------------|--------------|---------------|----------|
| date           | Mar 18 2013  | hs            | nn       |
| solvent        | acetone      | sepal         | y        |
| sample         | bagivi       | SPECIAL       | 6340     |
| ACQUISITION    |              |               |          |
| ac             | 5081.3       | temp          | not used |
| at             | 0.150        | galtb         | 42       |
| ap             | 1524         | spib          | 0        |
| eb             | 4000         | F2 PROCESSING | 0        |
| as             | 32           | ab            | -0.075   |
| d1             | 1.000        | abs           | not used |
| nt             | 8            | fn            | 2048     |
| 2D ACQUISITION |              |               |          |
| sw1            | 5081.3       | ab1           | -0.025   |
| ni             | 256          | absl          | not used |
| o2             | PRESENTATION | 0             | procl    |
| ip             | 2048         | ip            | 2048     |
| SCHEDULE       |              |               |          |
| ns             | 0            | sp            | 368.4    |
| ns             | 0            | wp            | 927.9    |
| TRANSMITTER    |              |               |          |
| tu             | 81           | sp1           | 403.1    |
| afq            | 599.901      | wp1           | 903.1    |
| tof            | -543.4       | rf1           | 83.2     |
| lpcr           | 56           | rfg           | 0        |
| pw             | 9.100        | rf11          | 83.2     |
| gradients      | 5458         | rfg1          | 0        |
| PLOT           |              |               |          |
| g1v1k          | 0.001000     | wc            | 200.0    |
| g1v1k          | 0.001000     | mc            | 200.0    |
| g1v1k          | 0.001000     | mc2           | 200.0    |
| g1v1k          | 0.001000     | mc3           | 200.0    |
| g1v1k          | 0.001000     | mc4           | 200.0    |
| g1v1k          | 0.001000     | mc5           | 200.0    |
| g1v1k          | 0.001000     | mc6           | 200.0    |
| g1v1k          | 0.001000     | mc7           | 200.0    |
| g1v1k          | 0.001000     | mc8           | 200.0    |
| g1v1k          | 0.001000     | mc9           | 200.0    |
| g1v1k          | 0.001000     | mc10          | 200.0    |
| g1v1k          | 0.001000     | mc11          | 200.0    |
| g1v1k          | 0.001000     | mc12          | 200.0    |
| g1v1k          | 0.001000     | mc13          | 200.0    |
| g1v1k          | 0.001000     | mc14          | 200.0    |
| g1v1k          | 0.001000     | mc15          | 200.0    |
| g1v1k          | 0.001000     | mc16          | 200.0    |
| g1v1k          | 0.001000     | mc17          | 200.0    |
| g1v1k          | 0.001000     | mc18          | 200.0    |
| g1v1k          | 0.001000     | mc19          | 200.0    |
| g1v1k          | 0.001000     | mc20          | 200.0    |
| g1v1k          | 0.001000     | mc21          | 200.0    |
| g1v1k          | 0.001000     | mc22          | 200.0    |
| g1v1k          | 0.001000     | mc23          | 200.0    |
| g1v1k          | 0.001000     | mc24          | 200.0    |
| g1v1k          | 0.001000     | mc25          | 200.0    |
| g1v1k          | 0.001000     | mc26          | 200.0    |
| g1v1k          | 0.001000     | mc27          | 200.0    |
| g1v1k          | 0.001000     | mc28          | 200.0    |
| g1v1k          | 0.001000     | mc29          | 200.0    |
| g1v1k          | 0.001000     | mc30          | 200.0    |
| g1v1k          | 0.001000     | mc31          | 200.0    |
| g1v1k          | 0.001000     | mc32          | 200.0    |
| g1v1k          | 0.001000     | mc33          | 200.0    |
| g1v1k          | 0.001000     | mc34          | 200.0    |
| g1v1k          | 0.001000     | mc35          | 200.0    |
| g1v1k          | 0.001000     | mc36          | 200.0    |
| g1v1k          | 0.001000     | mc37          | 200.0    |
| g1v1k          | 0.001000     | mc38          | 200.0    |
| g1v1k          | 0.001000     | mc39          | 200.0    |
| g1v1k          | 0.001000     | mc40          | 200.0    |
| g1v1k          | 0.001000     | mc41          | 200.0    |
| g1v1k          | 0.001000     | mc42          | 200.0    |
| g1v1k          | 0.001000     | mc43          | 200.0    |
| g1v1k          | 0.001000     | mc44          | 200.0    |
| g1v1k          | 0.001000     | mc45          | 200.0    |
| g1v1k          | 0.001000     | mc46          | 200.0    |
| g1v1k          | 0.001000     | mc47          | 200.0    |
| g1v1k          | 0.001000     | mc48          | 200.0    |
| g1v1k          | 0.001000     | mc49          | 200.0    |
| g1v1k          | 0.001000     | mc50          | 200.0    |
| g1v1k          | 0.001000     | mc51          | 200.0    |
| g1v1k          | 0.001000     | mc52          | 200.0    |
| g1v1k          | 0.001000     | mc53          | 200.0    |
| g1v1k          | 0.001000     | mc54          | 200.0    |
| g1v1k          | 0.001000     | mc55          | 200.0    |
| g1v1k          | 0.001000     | mc56          | 200.0    |
| g1v1k          | 0.001000     | mc57          | 200.0    |
| g1v1k          | 0.001000     | mc58          | 200.0    |
| g1v1k          | 0.001000     | mc59          | 200.0    |
| g1v1k          | 0.001000     | mc60          | 200.0    |
| g1v1k          | 0.001000     | mc61          | 200.0    |
| g1v1k          | 0.001000     | mc62          | 200.0    |
| g1v1k          | 0.001000     | mc63          | 200.0    |
| g1v1k          | 0.001000     | mc64          | 200.0    |
| g1v1k          | 0.001000     | mc65          | 200.0    |
| g1v1k          | 0.001000     | mc66          | 200.0    |
| g1v1k          | 0.001000     | mc67          | 200.0    |
| g1v1k          | 0.001000     | mc68          | 200.0    |
| g1v1k          | 0.001000     | mc69          | 200.0    |
| g1v1k          | 0.001000     | mc70          | 200.0    |
| g1v1k          | 0.001000     | mc71          | 200.0    |
| g1v1k          | 0.001000     | mc72          | 200.0    |
| g1v1k          | 0.001000     | mc73          | 200.0    |
| g1v1k          | 0.001000     | mc74          | 200.0    |
| g1v1k          | 0.001000     | mc75          | 200.0    |
| g1v1k          | 0.001000     | mc76          | 200.0    |
| g1v1k          | 0.001000     | mc77          | 200.0    |
| g1v1k          | 0.001000     | mc78          | 200.0    |
| g1v1k          | 0.001000     | mc79          | 200.0    |
| g1v1k          | 0.001000     | mc80          | 200.0    |
| g1v1k          | 0.001000     | mc81          | 200.0    |
| g1v1k          | 0.001000     | mc82          | 200.0    |
| g1v1k          | 0.001000     | mc83          | 200.0    |
| g1v1k          | 0.001000     | mc84          | 200.0    |
| g1v1k          | 0.001000     | mc85          | 200.0    |
| g1v1k          | 0.001000     | mc86          | 200.0    |
| g1v1k          | 0.001000     | mc87          | 200.0    |
| g1v1k          | 0.001000     | mc88          | 200.0    |
| g1v1k          | 0.001000     | mc89          | 200.0    |
| g1v1k          | 0.001000     | mc90          | 200.0    |
| g1v1k          | 0.001000     | mc91          | 200.0    |
| g1v1k          | 0.001000     | mc92          | 200.0    |
| g1v1k          | 0.001000     | mc93          | 200.0    |
| g1v1k          | 0.001000     | mc94          | 200.0    |
| g1v1k          | 0.001000     | mc95          | 200.0    |
| g1v1k          | 0.001000     | mc96          | 200.0    |
| g1v1k          | 0.001000     | mc97          | 200.0    |
| g1v1k          | 0.001000     | mc98          | 200.0    |
| g1v1k          | 0.001000     | mc99          | 200.0    |
| g1v1k          | 0.001000     | mc100         | 200.0    |

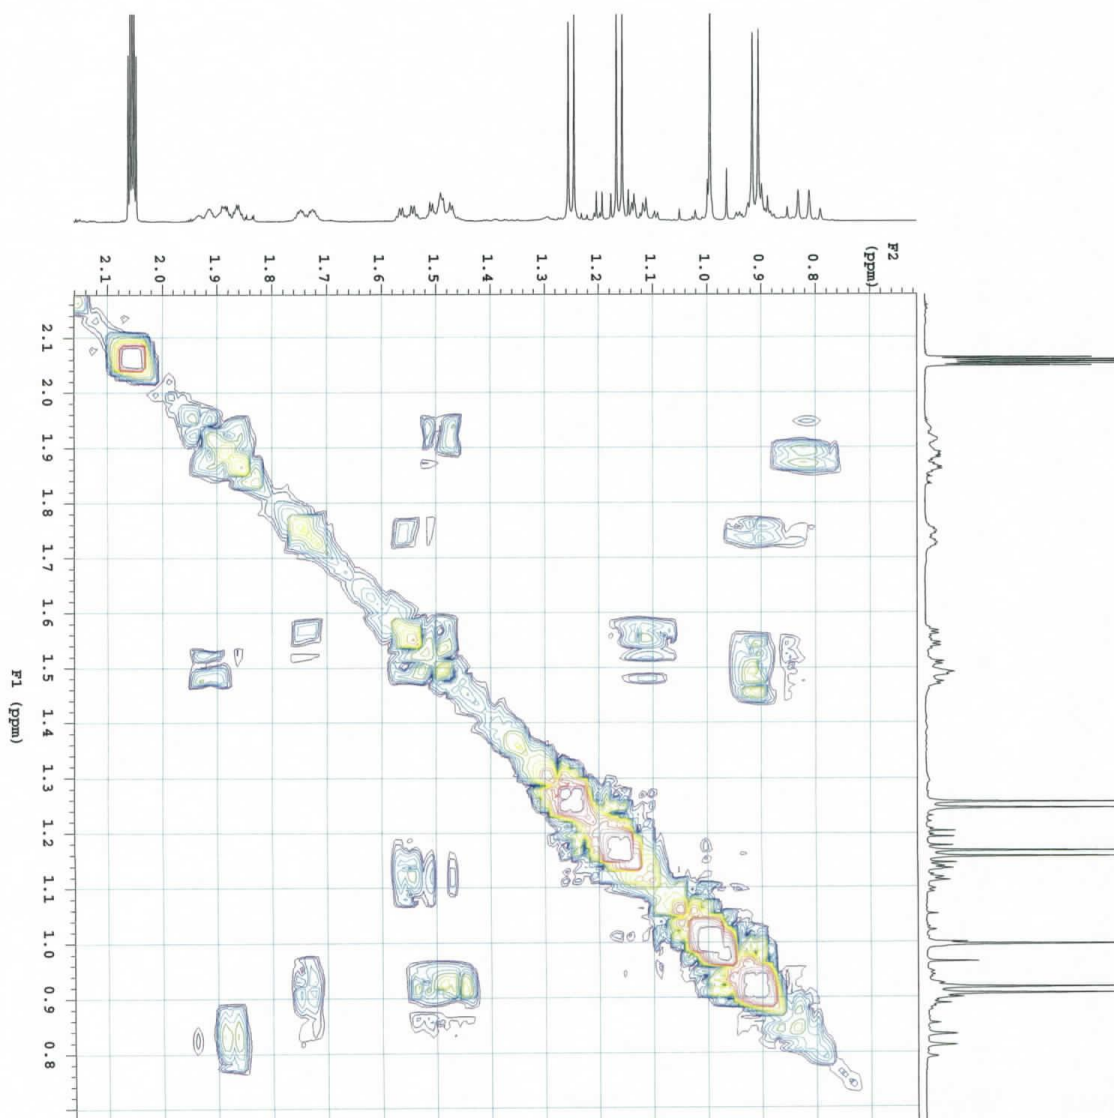

Figure S3 NOESY of 1

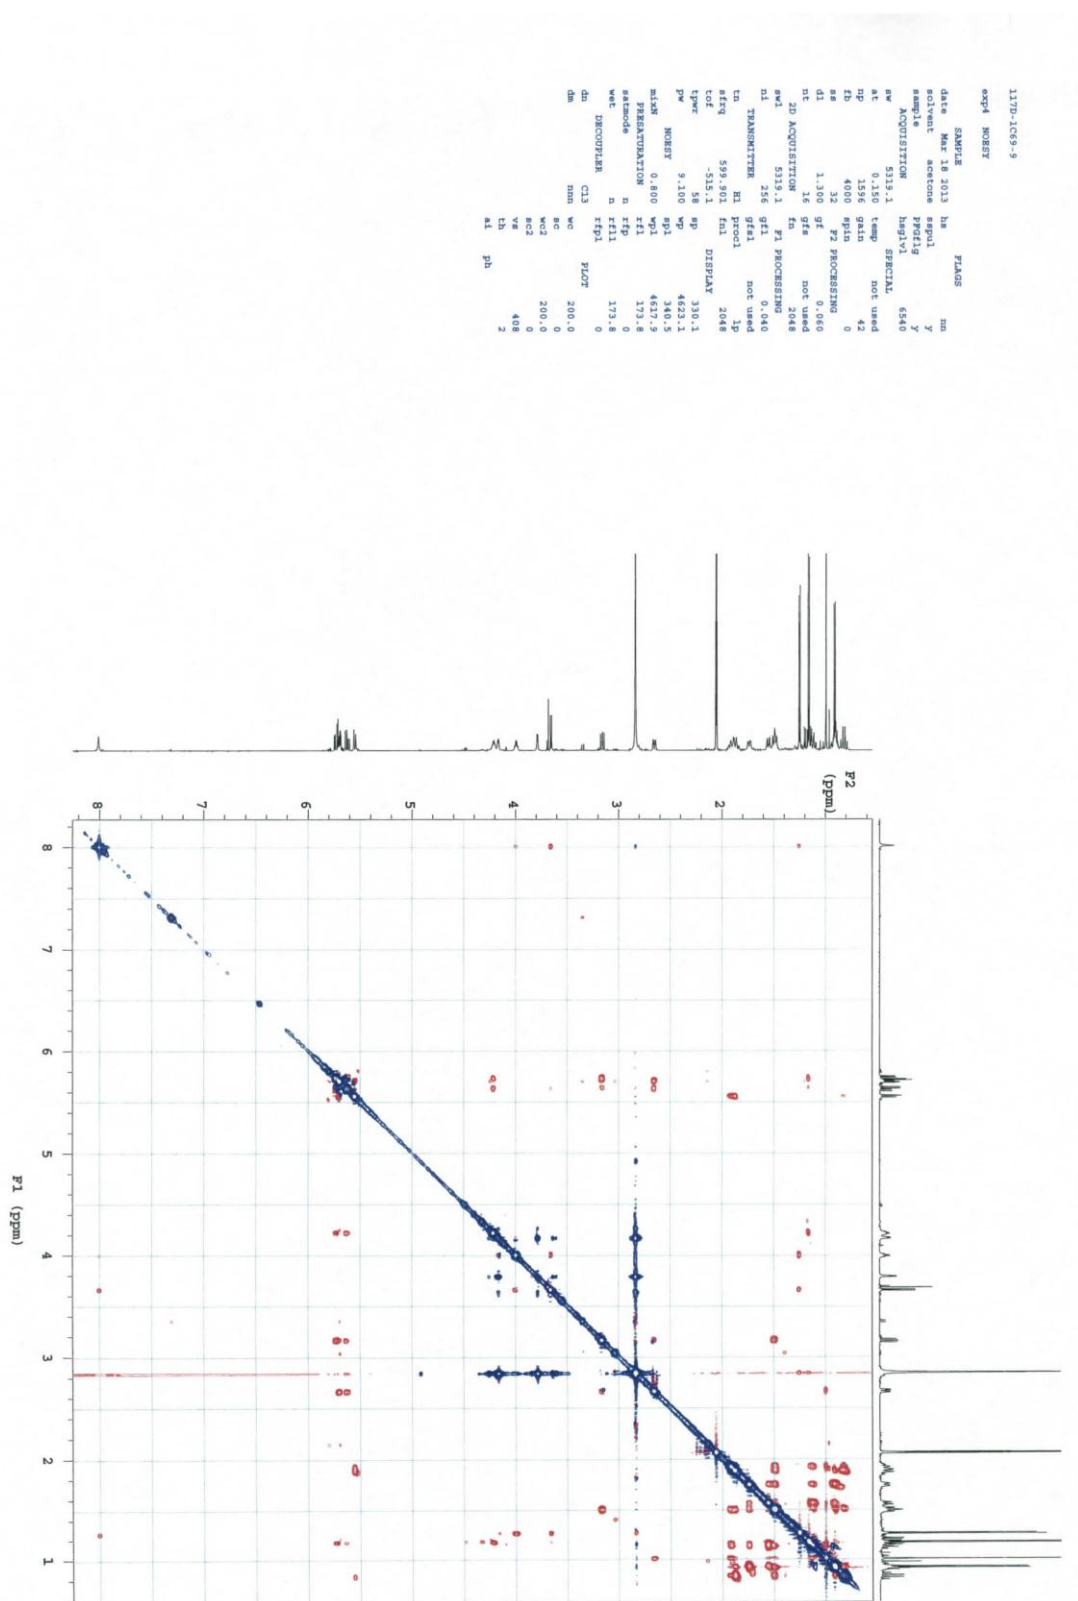



```

117D-1G69-9
exp4 NOESY

SAMPLE
date Mar 18 2013
solvent acetone
sample y
ACQUISITION
nu 5319.1
at 0.150 temp not used
ap 1356 gain 42
as 4032
d1 1.300 g4 not used
nt 16 gfs not used
2D ACQUISITION
sw1 5319.1 f1 PROCESSING
rl 256 gfl 0.040
tn TRANSMITTER m1 proc1 ip
rfreq 599.901 fm1
tocf -5319.1 DISPLAY 2048
tpec 58 ap 408.0
pw 9.100 p 1356.0
mlsm NOESY 0.800 wpl 433.2
PRESATURATION n rfp 1231.1
satmode n rfp 173.8
wet n rfp1 173.8
DECOUPLER C13 rfp1 0
dm nmh wc 200.0
nmh wc 200.0
sc 0
wca 200.0
vnu 0
vb 408
al ph 2

```

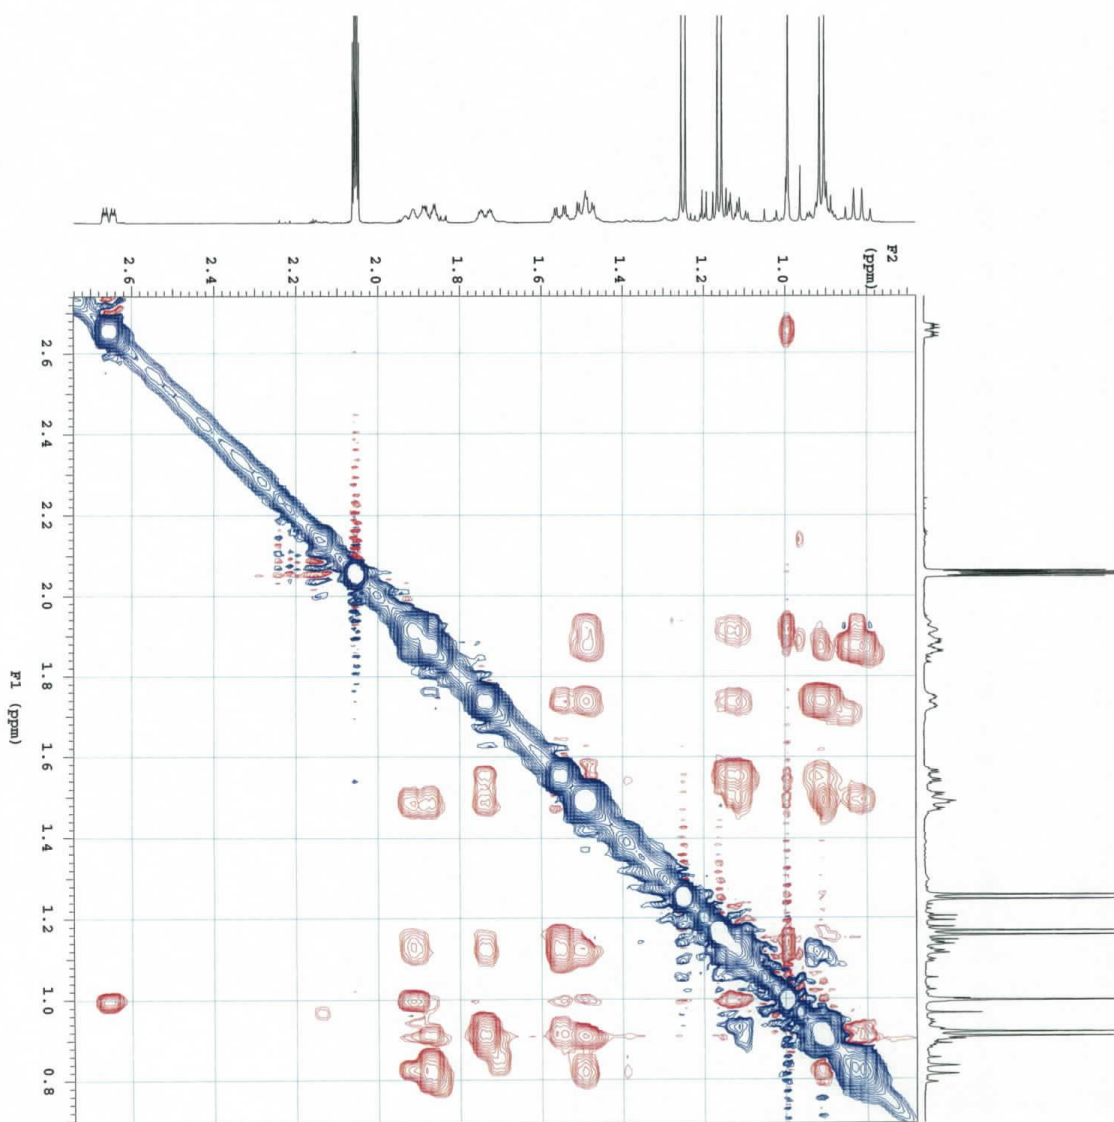

17

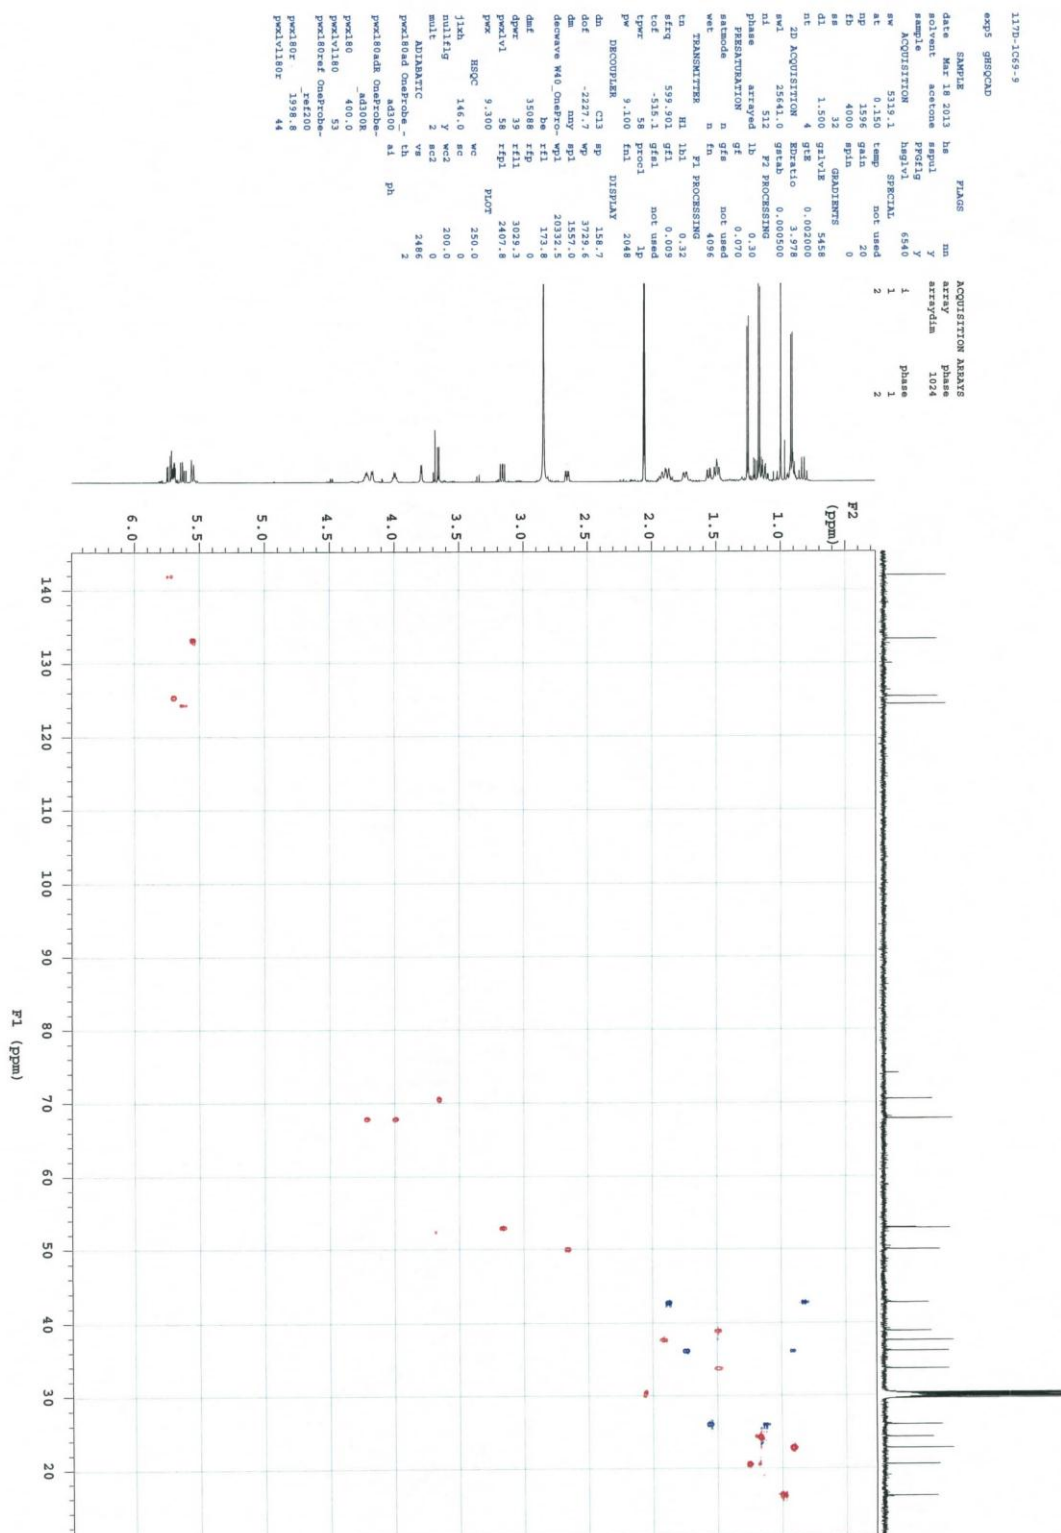



19

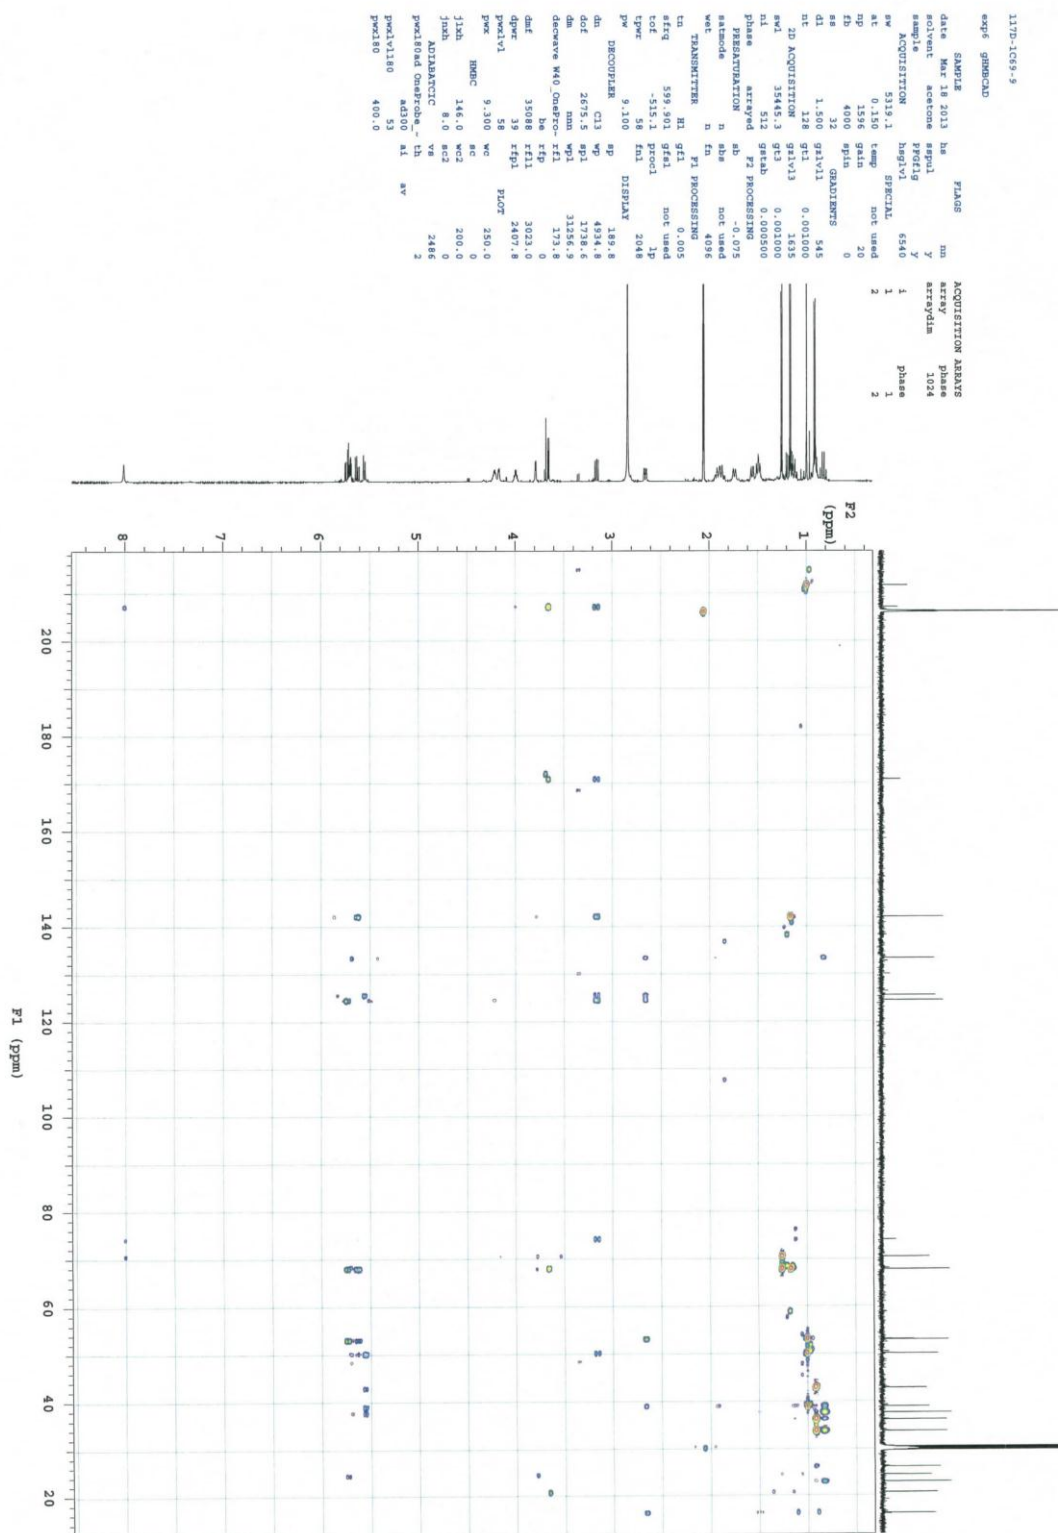

117D-1CS9-9

expt: gsmrcbm

| SAMPLE         |             | PLANS         |          | ACQUISITION ARRAYS |       |
|----------------|-------------|---------------|----------|--------------------|-------|
| date           | Mar 18 2013 | hs            | nm       | array              | phase |
| solvent        | acetone     | aspl1         | y        | arraydim           | 1024  |
| sample         | prof1g      | hsplv1        | y        |                    |       |
| acq            | 5313.1      | 6540          | 1        | 1                  | 1     |
| pw             | 0.150       | 0.001000      | 2        | 2                  | 2     |
| at             | 0.150       | temp          | not used |                    |       |
| np             | 1596        | gain          | 20       |                    |       |
| fb             | 4000        | spin          | 0        |                    |       |
| as             | 32          | GRADIENTS     | 0        |                    |       |
| dl             | 1.500       | gr1v1         | 545      |                    |       |
| nt             | 128         | gr1           | 0.001000 |                    |       |
| 2D ACQUISITION | gr1v13      | 1635          |          |                    |       |
| sw1            | 35445.3     | gr13          | 0.001000 |                    |       |
| nl             | 512         | gr1ab         | 0.000500 |                    |       |
| phase          | arrayed     | F2 PROCESSING |          |                    |       |
| PREPARATION    | AB          | not used      |          |                    |       |
| acqmode        | h           | not used      |          |                    |       |
| wet            | h           | not used      |          |                    |       |
| TRANSMITTER    | h           | F1 PROCESSING |          |                    |       |
| ln             | 599.901     | gr1           | 0.005    |                    |       |
| strq           | -515.1      | gr1           | not used |                    |       |
| tof            | 58          | fn1           | 1p       |                    |       |
| tpwr           | 9.100       | DISPLAY       | 2048     |                    |       |
| pw             | RECOUPLES   | sp            | 317.1    |                    |       |
| dn             | CL13        | wp            | 2321.9   |                    |       |
| dof            | 2875.5      | sp1           | 1173.2   |                    |       |
| dm             | nm          | wp1           | 3117.7   |                    |       |
| decave         | W40         | gr1           | 173.6    |                    |       |
| dut            | 35088       | rf1           | 3023.0   |                    |       |
| dprc           | 39          | rf1           | 2467.8   |                    |       |
| provlv1        | 58          | PLOT          | 250.0    |                    |       |
| pxc            | 9.300       | wc            | 0        |                    |       |
| jxkh           | 146.0       | wc2           | 200.0    |                    |       |
| jxkh           | 8.0         | mc2           | 0        |                    |       |
| AUTOMATIC      | vs          |               | 2486     |                    |       |
| provlv1180     | 400.0       | at            | 2        |                    |       |
| provlv1180     | 400.0       |               |          |                    |       |

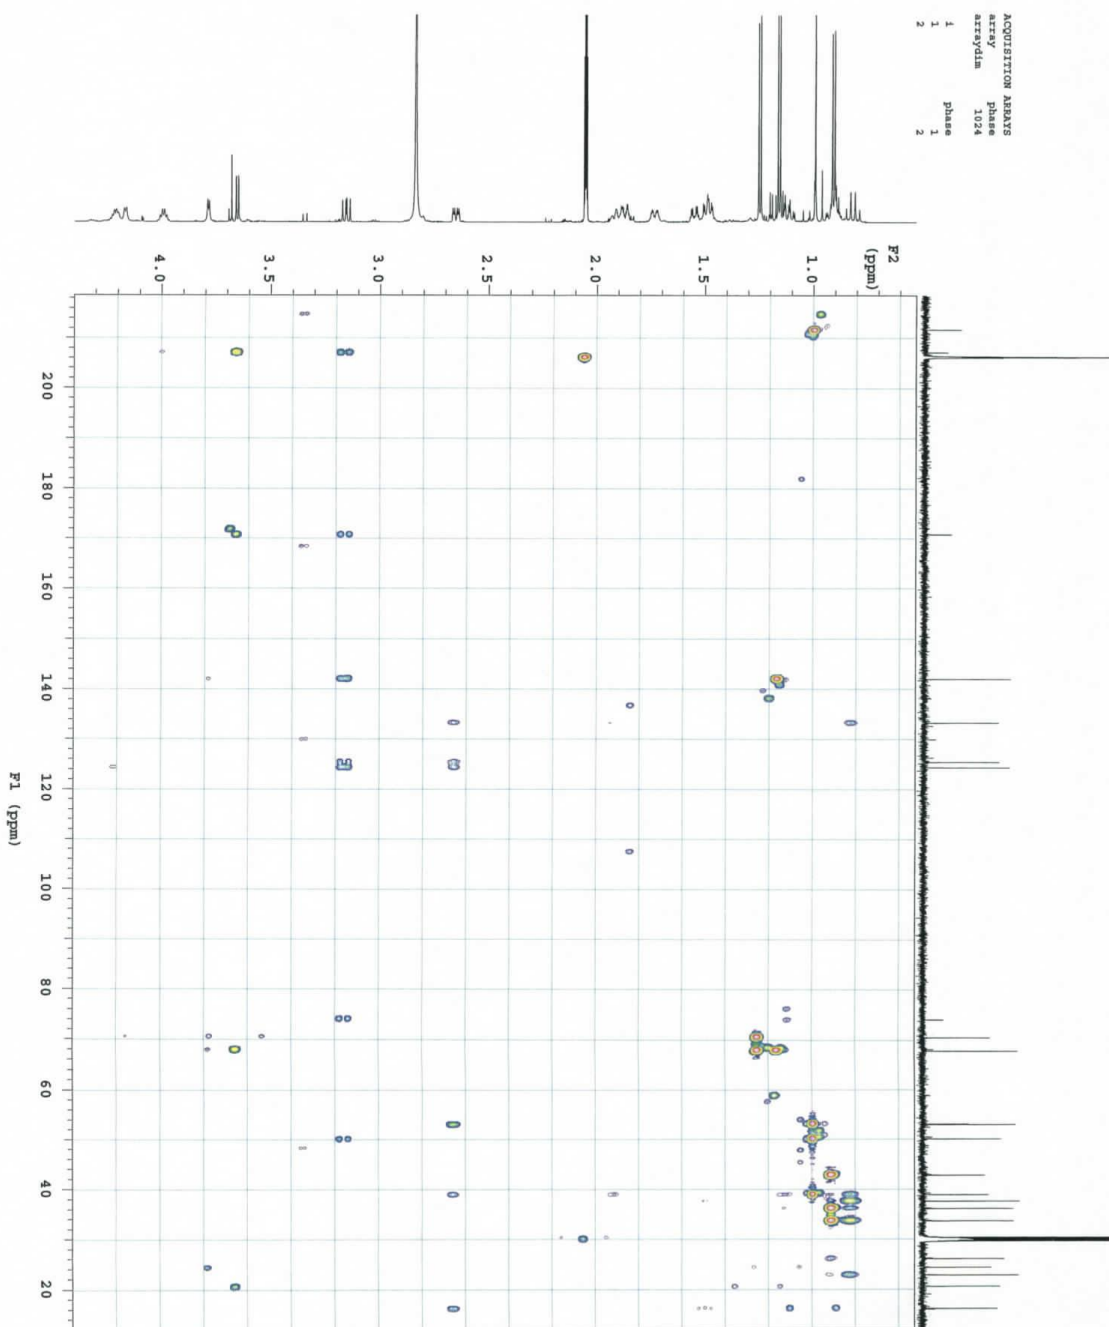

117P-1CS9-9  
exp6 gbmccm

| SAMPLE         |             | FLAGS         |          | ACQUISITION ABAYS |       |
|----------------|-------------|---------------|----------|-------------------|-------|
| date           | Mar 18 2013 | hs            | nm       | array             | phase |
| solvent        | acetone     | ssol1         | y        | arraydim          | 1024  |
| sample         | Y           | specifig      | Y        |                   |       |
| ACQUISITION    | hsq1v1      | 5440          | 1        | phase             | 1     |
| ac             | 5119.1      | SPECIAL       | not used | 2                 | 2     |
| nt             | 0.150       | temp          | not used |                   |       |
| fp             | 4000        | gain          | 20       |                   |       |
| fs             | 4000        | spin          | 0        |                   |       |
| as             | 32          | GRADIENTS     | 545      |                   |       |
| dl             | 1.500       | g2v11         | 0.001000 |                   |       |
| nt             | 128         | g2v13         | 1635     |                   |       |
| 2D ACQUISITION | g2v13       | 0.001000      |          |                   |       |
| sw1            | 35445.3     | g1v3          | 0.001000 |                   |       |
| nt             | 512         | g2v1b         | 0.000500 |                   |       |
| phase          | arrayed     | P2 PROCESSING | -0.075   |                   |       |
| PREFATTENATION | ab          | not used      |          |                   |       |
| acmode         | n           | abn           | not used |                   |       |
| wt             | 0.005       | P1 PROCESSING | 4096     |                   |       |
| tn             | 0.005       | not used      |          |                   |       |
| afreq          | 559.401     | afat          | not used |                   |       |
| tot            | -515.1      | procl         | 1p       |                   |       |
| tpw            | 58          | fn1           | 2048     |                   |       |
| PW             | 5.100       | DISPLAY       | 221.0    |                   |       |
| dn             | CL3         | wp            | 4867.2   |                   |       |
| dof            | 2675.5      | wp1           | 2084.7   |                   |       |
| dm             | nm          | wp1           | 8657.5   |                   |       |
| dacwave        | W40         | Qwave-ef1     | 173.8    |                   |       |
| def            | 35000       | ef1           | 1023.0   |                   |       |
| dpr            | 38          | rfp1          | 2407.8   |                   |       |
| pxv1           | 58          | PLOT          | 280.0    |                   |       |
| pxw            | 5.300       | wc            | 280.0    |                   |       |
| hmc            | ac          | ac            | 0        |                   |       |
| j1xh           | 146.0       | wc2           | 200.0    |                   |       |
| j1xh           | 8.0         | ac2           | 0        |                   |       |
| ADJMANCIC      | vs          |               | 2486     |                   |       |
| pxv180d        | Qwave-ef1   |               | 2        |                   |       |
| pxv180         | ad300       | at            | nv       |                   |       |
| pxv180         | 400.0       |               |          |                   |       |

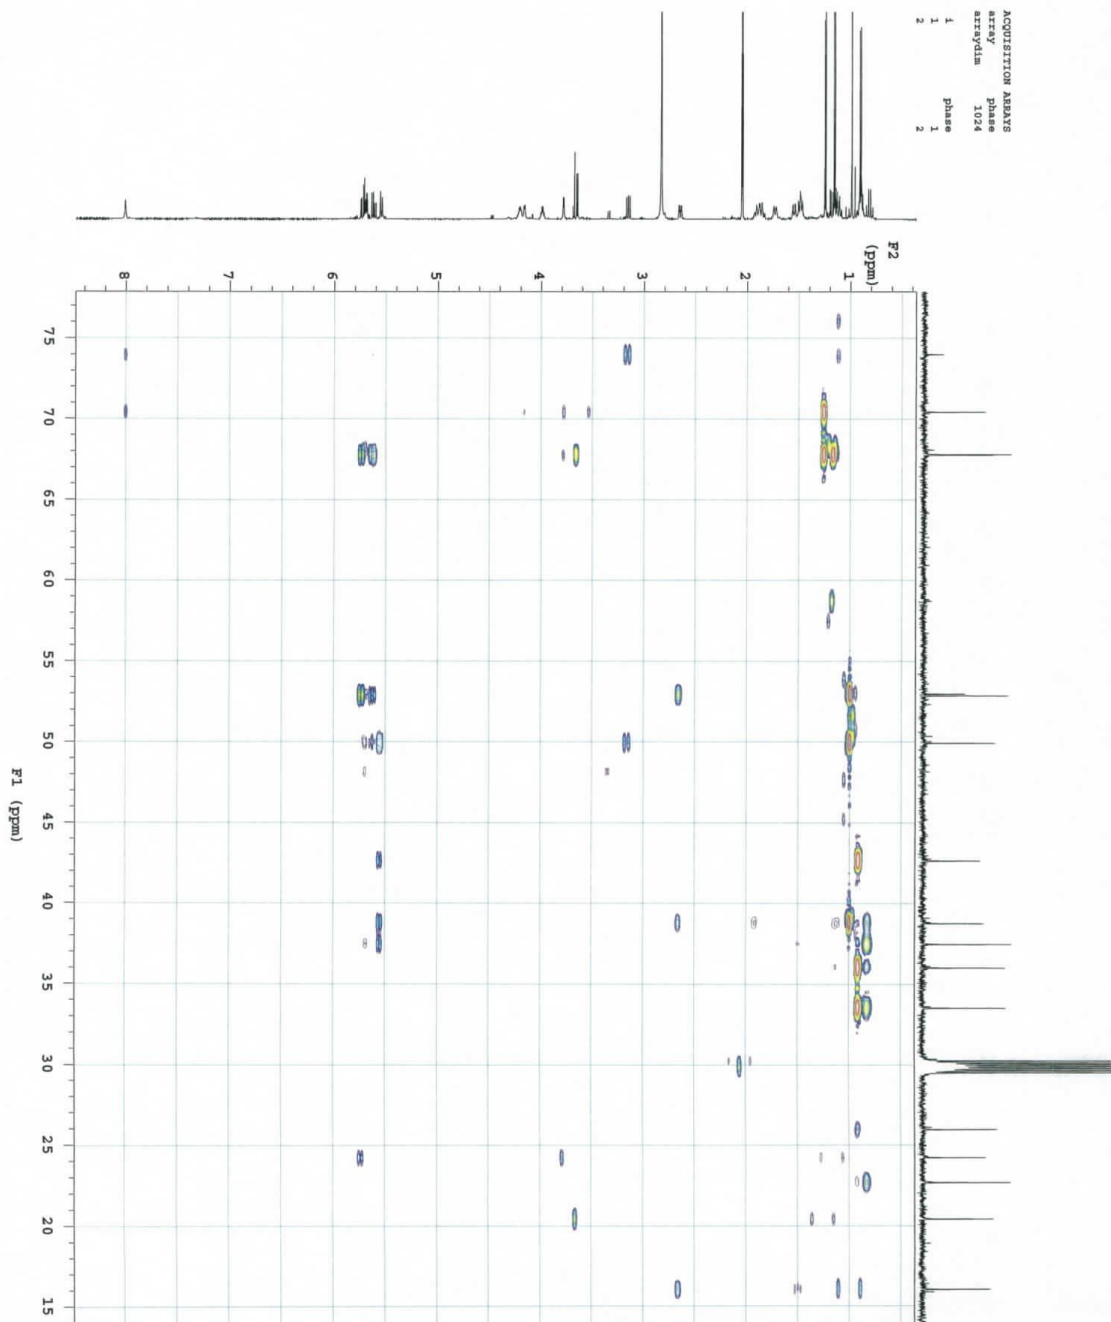



117D-1C56-9

expf gbrb00d

| SAMPLE  |             | FLAGS   |      | ACQUISITION ARRAYS |       |
|---------|-------------|---------|------|--------------------|-------|
| date    | Mar 18 2013 | hs      | nm   | array              | phase |
| solvent | acetone     | aspl    | y    | arraydim           | 1024  |
| sample  | pyrid       | pyrid   | y    |                    |       |
| acq1    | hsplv1      | SPECTRA | 6540 | 1                  | 1     |
| acq2    | hsplv1      | SPECTRA | 6540 | 2                  | 2     |
| acq3    | hsplv1      | SPECTRA | 6540 | 3                  | 3     |
| acq4    | hsplv1      | SPECTRA | 6540 | 4                  | 4     |
| acq5    | hsplv1      | SPECTRA | 6540 | 5                  | 5     |
| acq6    | hsplv1      | SPECTRA | 6540 | 6                  | 6     |
| acq7    | hsplv1      | SPECTRA | 6540 | 7                  | 7     |
| acq8    | hsplv1      | SPECTRA | 6540 | 8                  | 8     |
| acq9    | hsplv1      | SPECTRA | 6540 | 9                  | 9     |
| acq10   | hsplv1      | SPECTRA | 6540 | 10                 | 10    |
| acq11   | hsplv1      | SPECTRA | 6540 | 11                 | 11    |
| acq12   | hsplv1      | SPECTRA | 6540 | 12                 | 12    |
| acq13   | hsplv1      | SPECTRA | 6540 | 13                 | 13    |
| acq14   | hsplv1      | SPECTRA | 6540 | 14                 | 14    |
| acq15   | hsplv1      | SPECTRA | 6540 | 15                 | 15    |
| acq16   | hsplv1      | SPECTRA | 6540 | 16                 | 16    |
| acq17   | hsplv1      | SPECTRA | 6540 | 17                 | 17    |
| acq18   | hsplv1      | SPECTRA | 6540 | 18                 | 18    |
| acq19   | hsplv1      | SPECTRA | 6540 | 19                 | 19    |
| acq20   | hsplv1      | SPECTRA | 6540 | 20                 | 20    |
| acq21   | hsplv1      | SPECTRA | 6540 | 21                 | 21    |
| acq22   | hsplv1      | SPECTRA | 6540 | 22                 | 22    |
| acq23   | hsplv1      | SPECTRA | 6540 | 23                 | 23    |
| acq24   | hsplv1      | SPECTRA | 6540 | 24                 | 24    |
| acq25   | hsplv1      | SPECTRA | 6540 | 25                 | 25    |
| acq26   | hsplv1      | SPECTRA | 6540 | 26                 | 26    |
| acq27   | hsplv1      | SPECTRA | 6540 | 27                 | 27    |
| acq28   | hsplv1      | SPECTRA | 6540 | 28                 | 28    |
| acq29   | hsplv1      | SPECTRA | 6540 | 29                 | 29    |
| acq30   | hsplv1      | SPECTRA | 6540 | 30                 | 30    |
| acq31   | hsplv1      | SPECTRA | 6540 | 31                 | 31    |
| acq32   | hsplv1      | SPECTRA | 6540 | 32                 | 32    |
| acq33   | hsplv1      | SPECTRA | 6540 | 33                 | 33    |
| acq34   | hsplv1      | SPECTRA | 6540 | 34                 | 34    |
| acq35   | hsplv1      | SPECTRA | 6540 | 35                 | 35    |
| acq36   | hsplv1      | SPECTRA | 6540 | 36                 | 36    |
| acq37   | hsplv1      | SPECTRA | 6540 | 37                 | 37    |
| acq38   | hsplv1      | SPECTRA | 6540 | 38                 | 38    |
| acq39   | hsplv1      | SPECTRA | 6540 | 39                 | 39    |
| acq40   | hsplv1      | SPECTRA | 6540 | 40                 | 40    |
| acq41   | hsplv1      | SPECTRA | 6540 | 41                 | 41    |
| acq42   | hsplv1      | SPECTRA | 6540 | 42                 | 42    |
| acq43   | hsplv1      | SPECTRA | 6540 | 43                 | 43    |
| acq44   | hsplv1      | SPECTRA | 6540 | 44                 | 44    |
| acq45   | hsplv1      | SPECTRA | 6540 | 45                 | 45    |
| acq46   | hsplv1      | SPECTRA | 6540 | 46                 | 46    |
| acq47   | hsplv1      | SPECTRA | 6540 | 47                 | 47    |
| acq48   | hsplv1      | SPECTRA | 6540 | 48                 | 48    |
| acq49   | hsplv1      | SPECTRA | 6540 | 49                 | 49    |
| acq50   | hsplv1      | SPECTRA | 6540 | 50                 | 50    |
| acq51   | hsplv1      | SPECTRA | 6540 | 51                 | 51    |
| acq52   | hsplv1      | SPECTRA | 6540 | 52                 | 52    |
| acq53   | hsplv1      | SPECTRA | 6540 | 53                 | 53    |
| acq54   | hsplv1      | SPECTRA | 6540 | 54                 | 54    |
| acq55   | hsplv1      | SPECTRA | 6540 | 55                 | 55    |
| acq56   | hsplv1      | SPECTRA | 6540 | 56                 | 56    |
| acq57   | hsplv1      | SPECTRA | 6540 | 57                 | 57    |
| acq58   | hsplv1      | SPECTRA | 6540 | 58                 | 58    |
| acq59   | hsplv1      | SPECTRA | 6540 | 59                 | 59    |
| acq60   | hsplv1      | SPECTRA | 6540 | 60                 | 60    |
| acq61   | hsplv1      | SPECTRA | 6540 | 61                 | 61    |
| acq62   | hsplv1      | SPECTRA | 6540 | 62                 | 62    |
| acq63   | hsplv1      | SPECTRA | 6540 | 63                 | 63    |
| acq64   | hsplv1      | SPECTRA | 6540 | 64                 | 64    |
| acq65   | hsplv1      | SPECTRA | 6540 | 65                 | 65    |
| acq66   | hsplv1      | SPECTRA | 6540 | 66                 | 66    |
| acq67   | hsplv1      | SPECTRA | 6540 | 67                 | 67    |
| acq68   | hsplv1      | SPECTRA | 6540 | 68                 | 68    |
| acq69   | hsplv1      | SPECTRA | 6540 | 69                 | 69    |
| acq70   | hsplv1      | SPECTRA | 6540 | 70                 | 70    |
| acq71   | hsplv1      | SPECTRA | 6540 | 71                 | 71    |
| acq72   | hsplv1      | SPECTRA | 6540 | 72                 | 72    |
| acq73   | hsplv1      | SPECTRA | 6540 | 73                 | 73    |
| acq74   | hsplv1      | SPECTRA | 6540 | 74                 | 74    |
| acq75   | hsplv1      | SPECTRA | 6540 | 75                 | 75    |
| acq76   | hsplv1      | SPECTRA | 6540 | 76                 | 76    |
| acq77   | hsplv1      | SPECTRA | 6540 | 77                 | 77    |
| acq78   | hsplv1      | SPECTRA | 6540 | 78                 | 78    |
| acq79   | hsplv1      | SPECTRA | 6540 | 79                 | 79    |
| acq80   | hsplv1      | SPECTRA | 6540 | 80                 | 80    |
| acq81   | hsplv1      | SPECTRA | 6540 | 81                 | 81    |
| acq82   | hsplv1      | SPECTRA | 6540 | 82                 | 82    |
| acq83   | hsplv1      | SPECTRA | 6540 | 83                 | 83    |
| acq84   | hsplv1      | SPECTRA | 6540 | 84                 | 84    |
| acq85   | hsplv1      | SPECTRA | 6540 | 85                 | 85    |
| acq86   | hsplv1      | SPECTRA | 6540 | 86                 | 86    |
| acq87   | hsplv1      | SPECTRA | 6540 | 87                 | 87    |
| acq88   | hsplv1      | SPECTRA | 6540 | 88                 | 88    |
| acq89   | hsplv1      | SPECTRA | 6540 | 89                 | 89    |
| acq90   | hsplv1      | SPECTRA | 6540 | 90                 | 90    |
| acq91   | hsplv1      | SPECTRA | 6540 | 91                 | 91    |
| acq92   | hsplv1      | SPECTRA | 6540 | 92                 | 92    |
| acq93   | hsplv1      | SPECTRA | 6540 | 93                 | 93    |
| acq94   | hsplv1      | SPECTRA | 6540 | 94                 | 94    |
| acq95   | hsplv1      | SPECTRA | 6540 | 95                 | 95    |
| acq96   | hsplv1      | SPECTRA | 6540 | 96                 | 96    |
| acq97   | hsplv1      | SPECTRA | 6540 | 97                 | 97    |
| acq98   | hsplv1      | SPECTRA | 6540 | 98                 | 98    |
| acq99   | hsplv1      | SPECTRA | 6540 | 99                 | 99    |
| acq100  | hsplv1      | SPECTRA | 6540 | 100                | 100   |

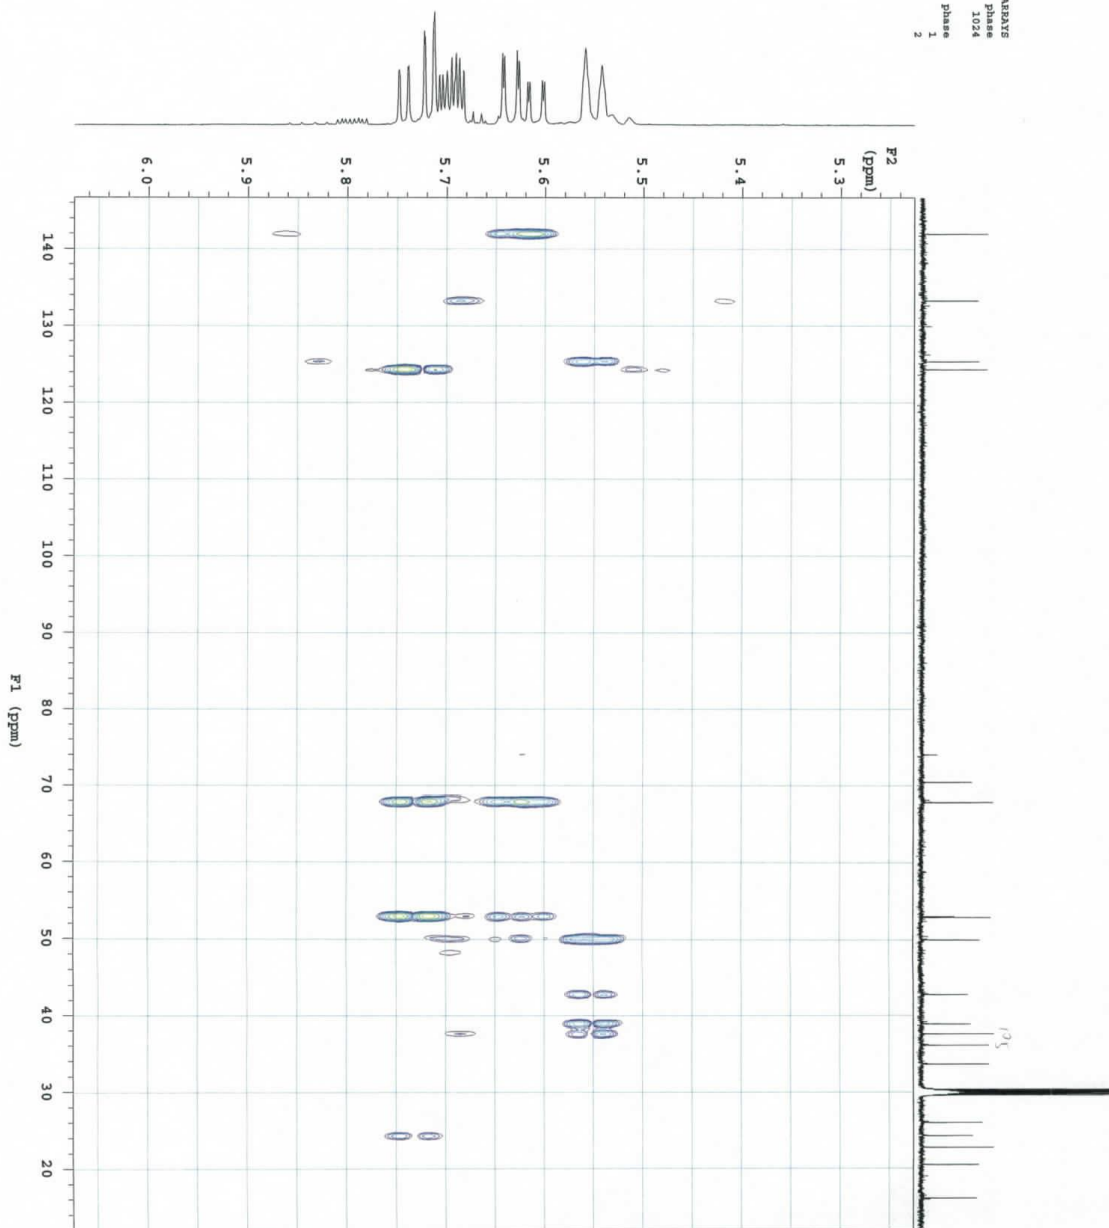

# Figure S6 FABMS of 1

[ Elemental Composition ]  
Data : 1607230 Date : 04-Aug-2016 17:33 Page: 1  
Sample: 117D-1 C176-11-VI  
Note : Matrix; NBA  
Inlet : Direct Ion Mode : FAB+  
RT : 8.07 min Scan#: (40,45)  
Elements : C 30/20, H 40/30, N 5/0, O 10/0  
Mass Tolerance : 20ppm, 1mmu if m/z > 50  
Unsaturation (U.S.) : -1.0 - 30.0

| Observed m/z | Int%  | Err[ppm / mmu] | U.S. | Composition     |
|--------------|-------|----------------|------|-----------------|
| 416.2436     | 100.0 | -0.3 / -0.1    | 8.5  | C 24 H 34 N O 5 |



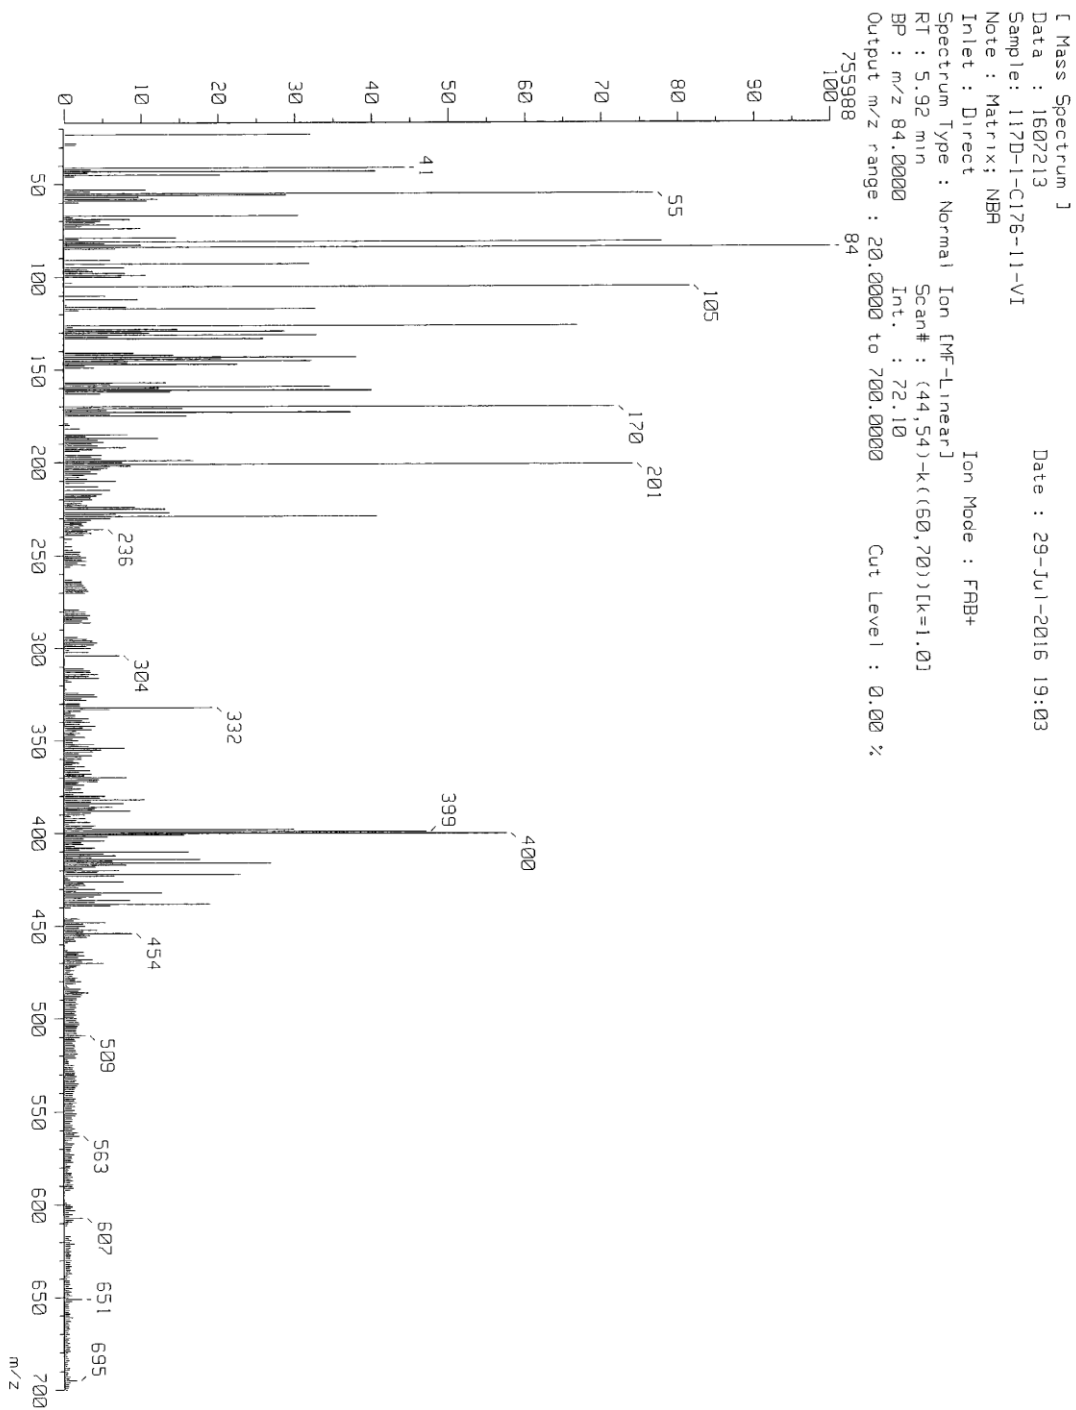

Supplement: s1 [file s1]
