# Supplementary material for: Altercrasins A–E, Decalin Derivatives, from a Sea-Urchin-Derived Alternaria sp.: Isolation and Structural Analysis Including Stereochemistry
Source: MDPI journal article supplement (doi:10.3390/md17040218), 2019-04-11

Figure S25  $^1\text{H}$  and  $^{13}\text{C}$  NMR spectra in acetone- $d_6$  of **5**

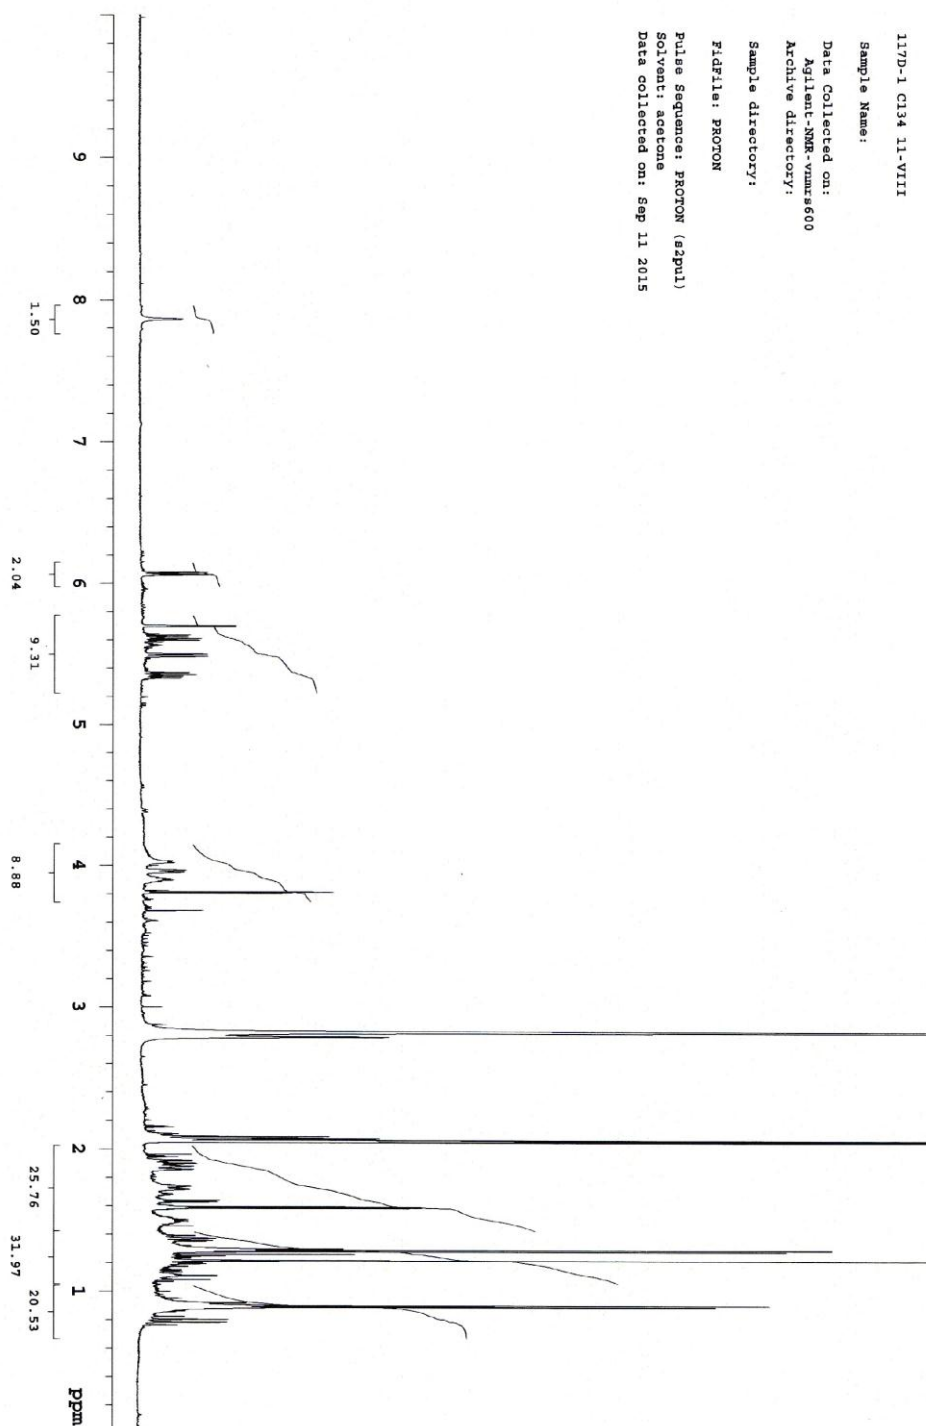

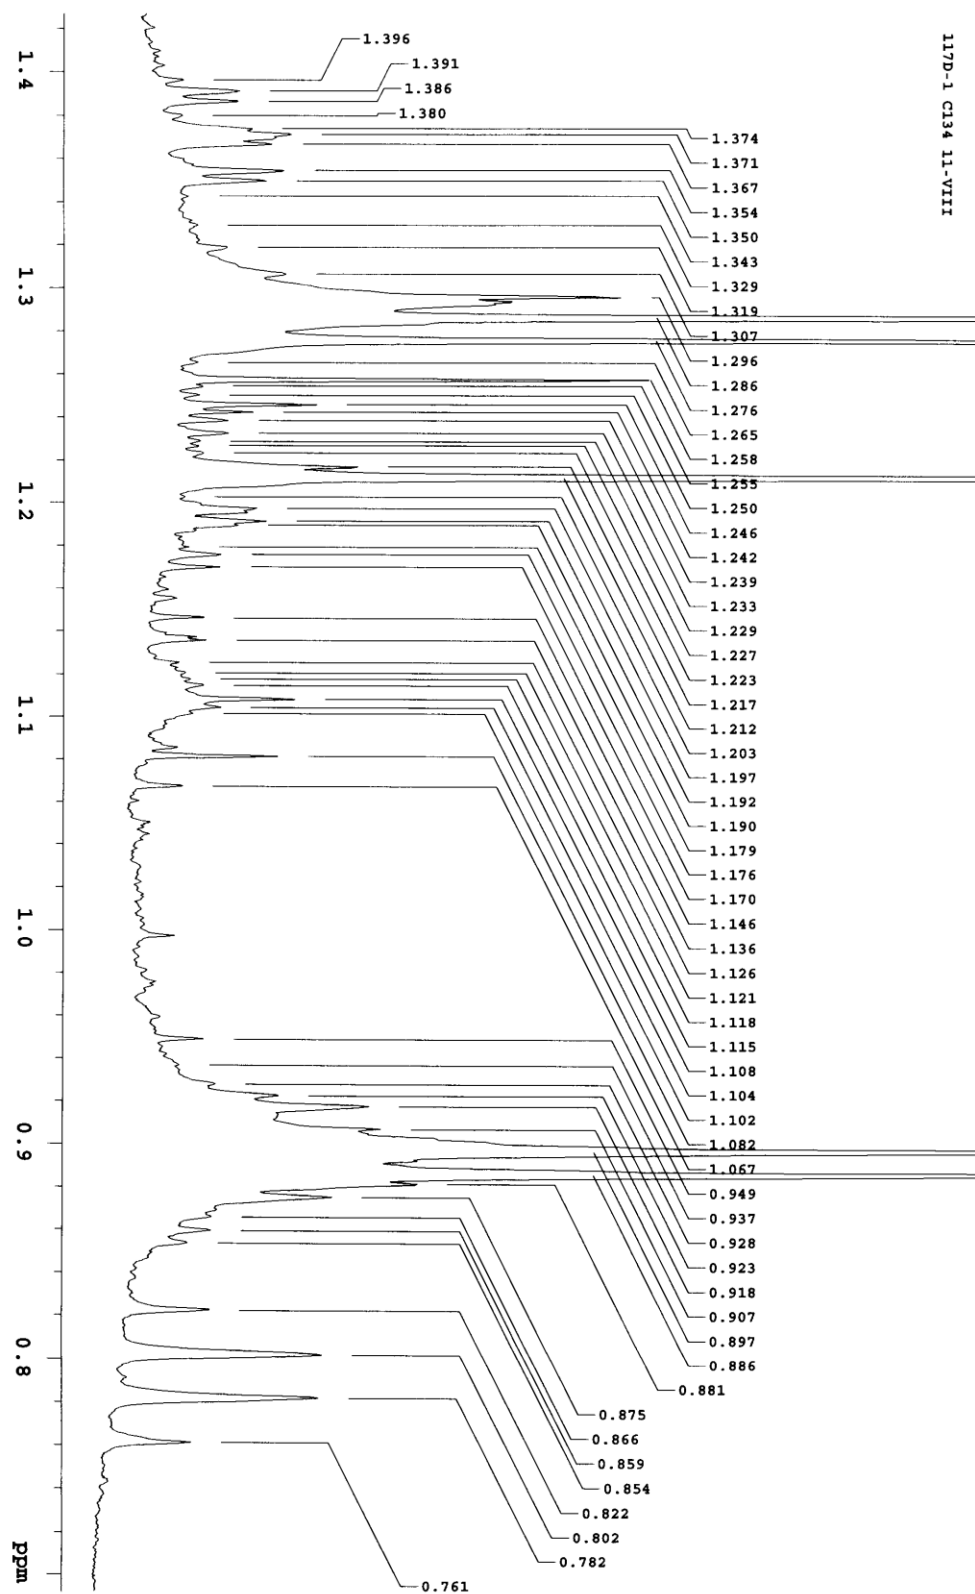

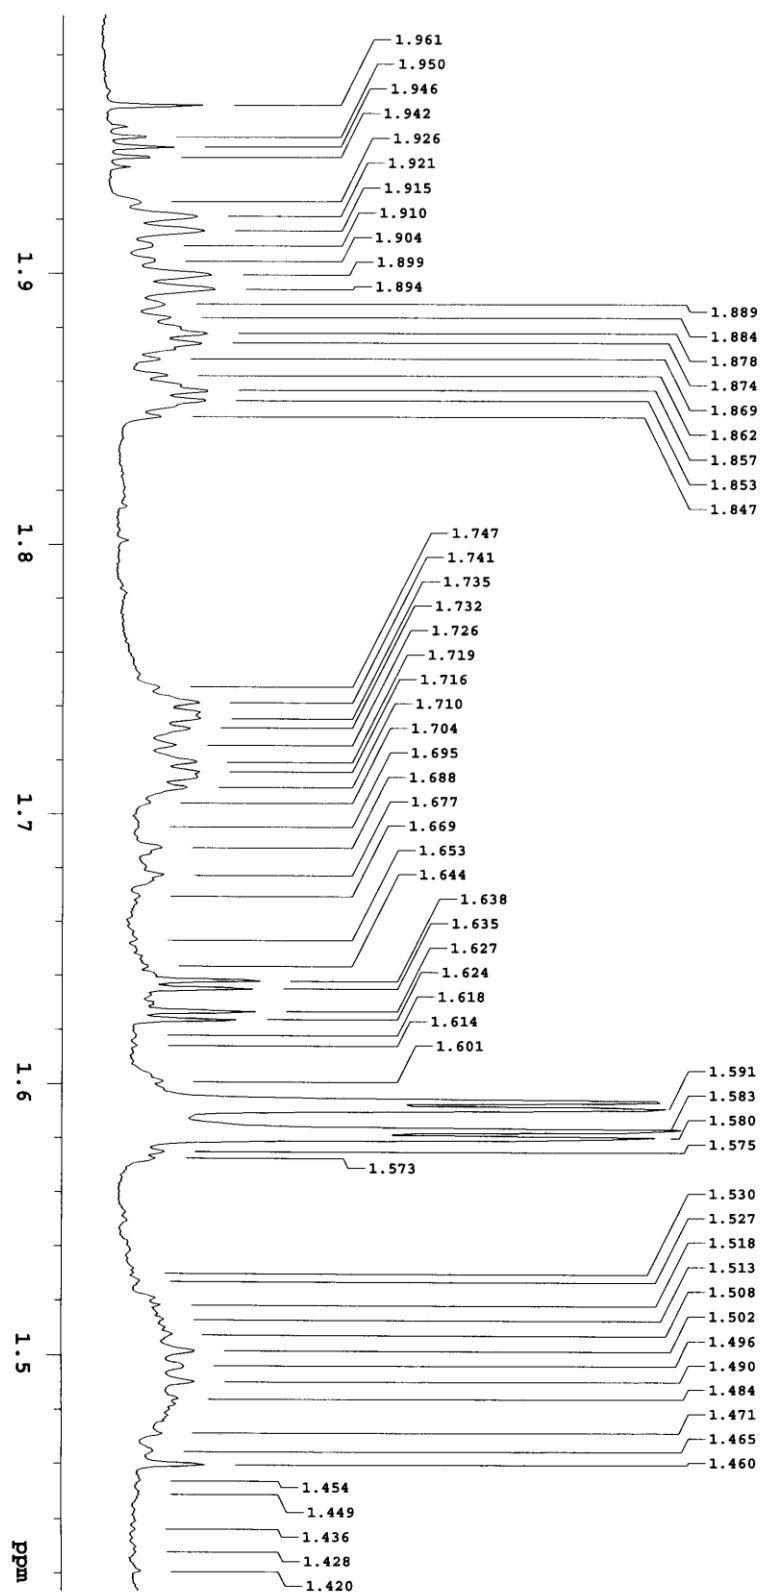

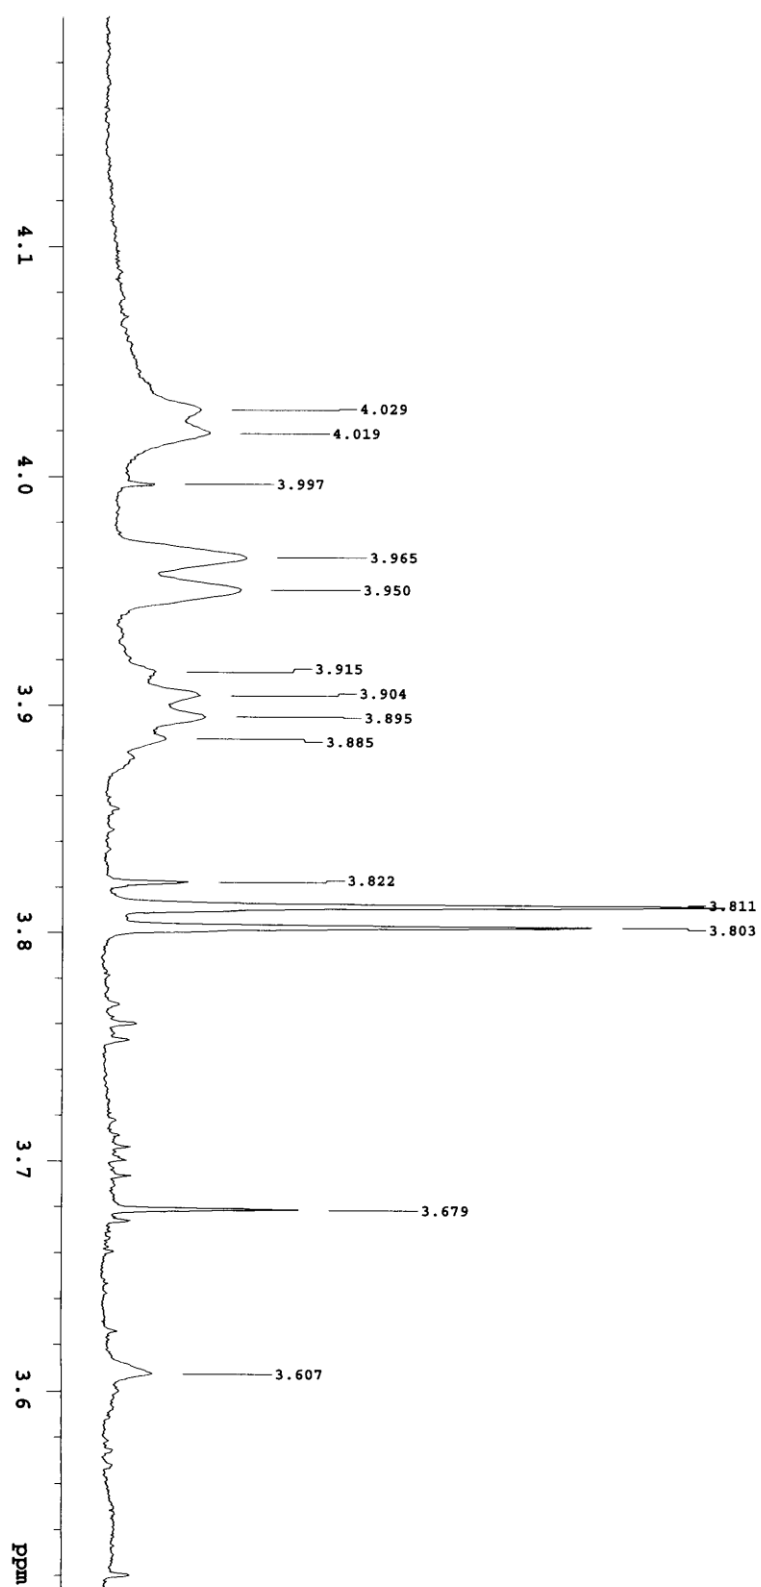

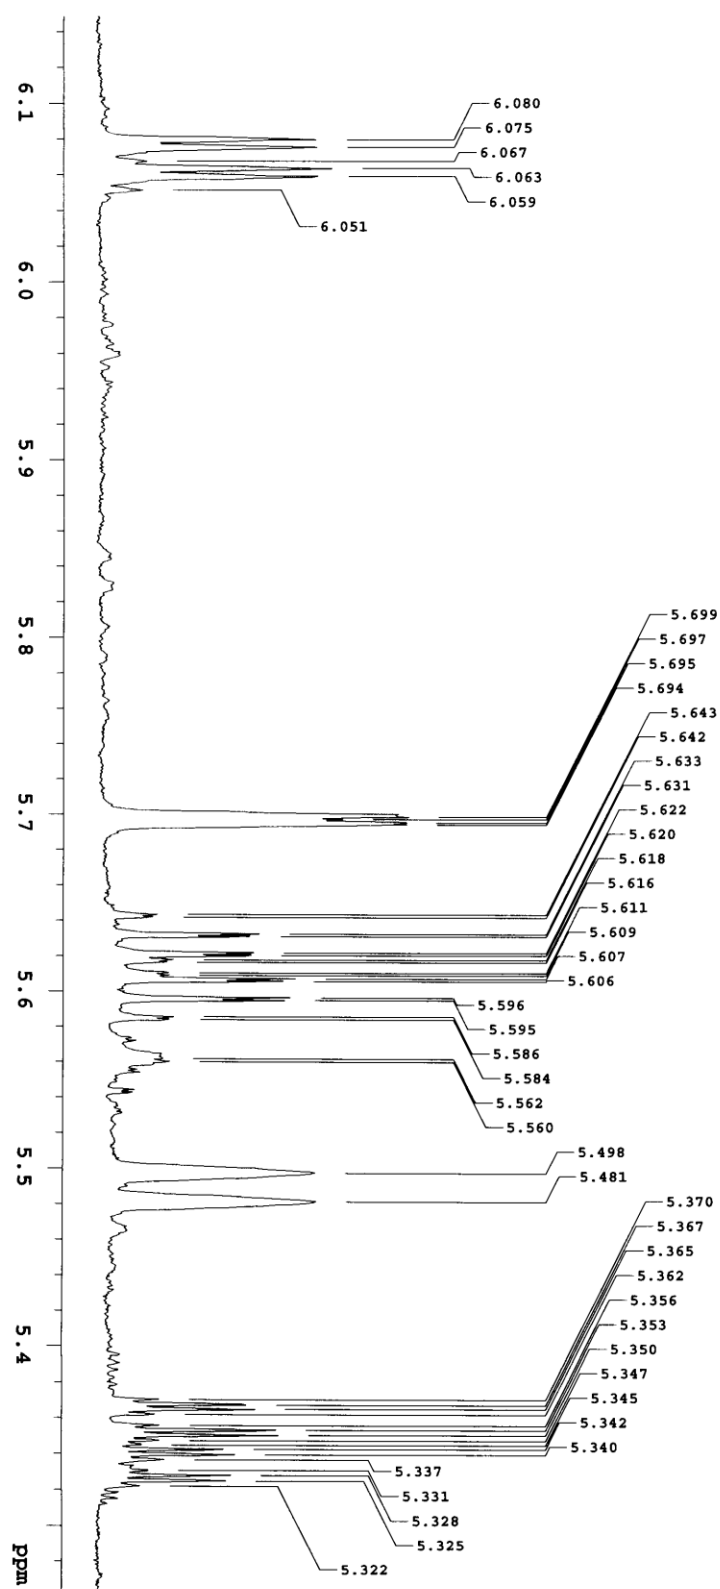

117D-1 C134 11-VIII

Sample Name:

Data Collected on:

Agilent-NMR-vnmr500

Archive directory:

Sample directory:

F1dFile CARBON

Pulse Sequence: CARBON (s2pul)

Solvent: acetone

Data collected on: Sep 11 2015

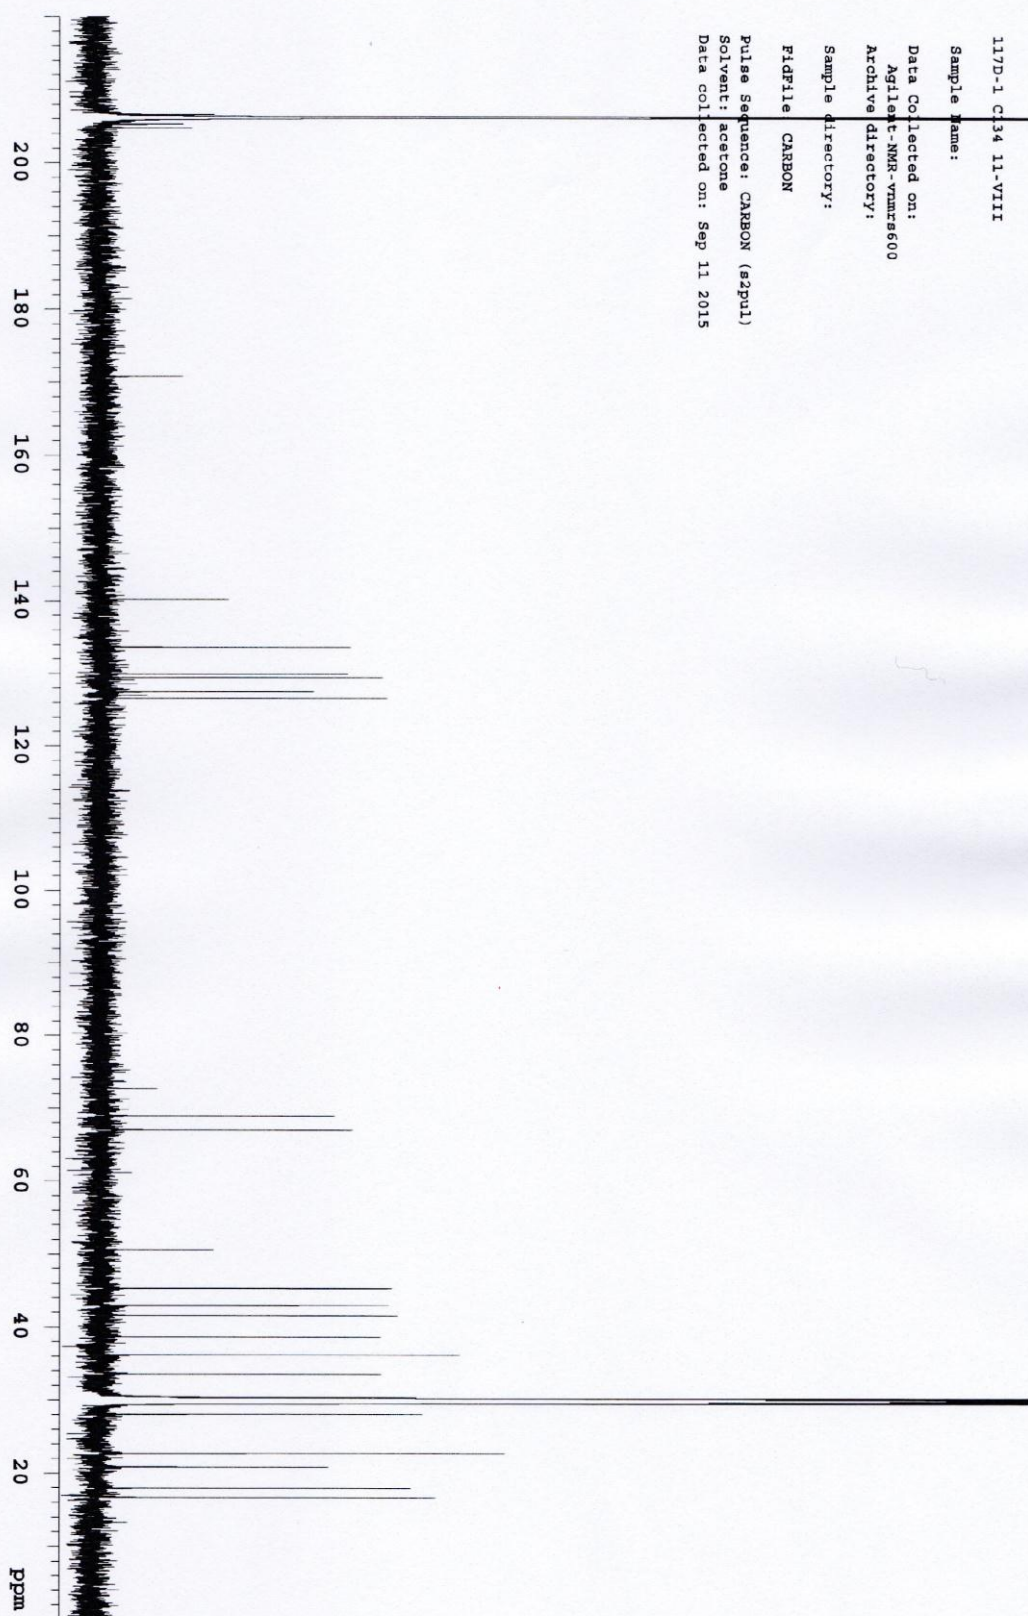

117D-1 C134 11-VIII

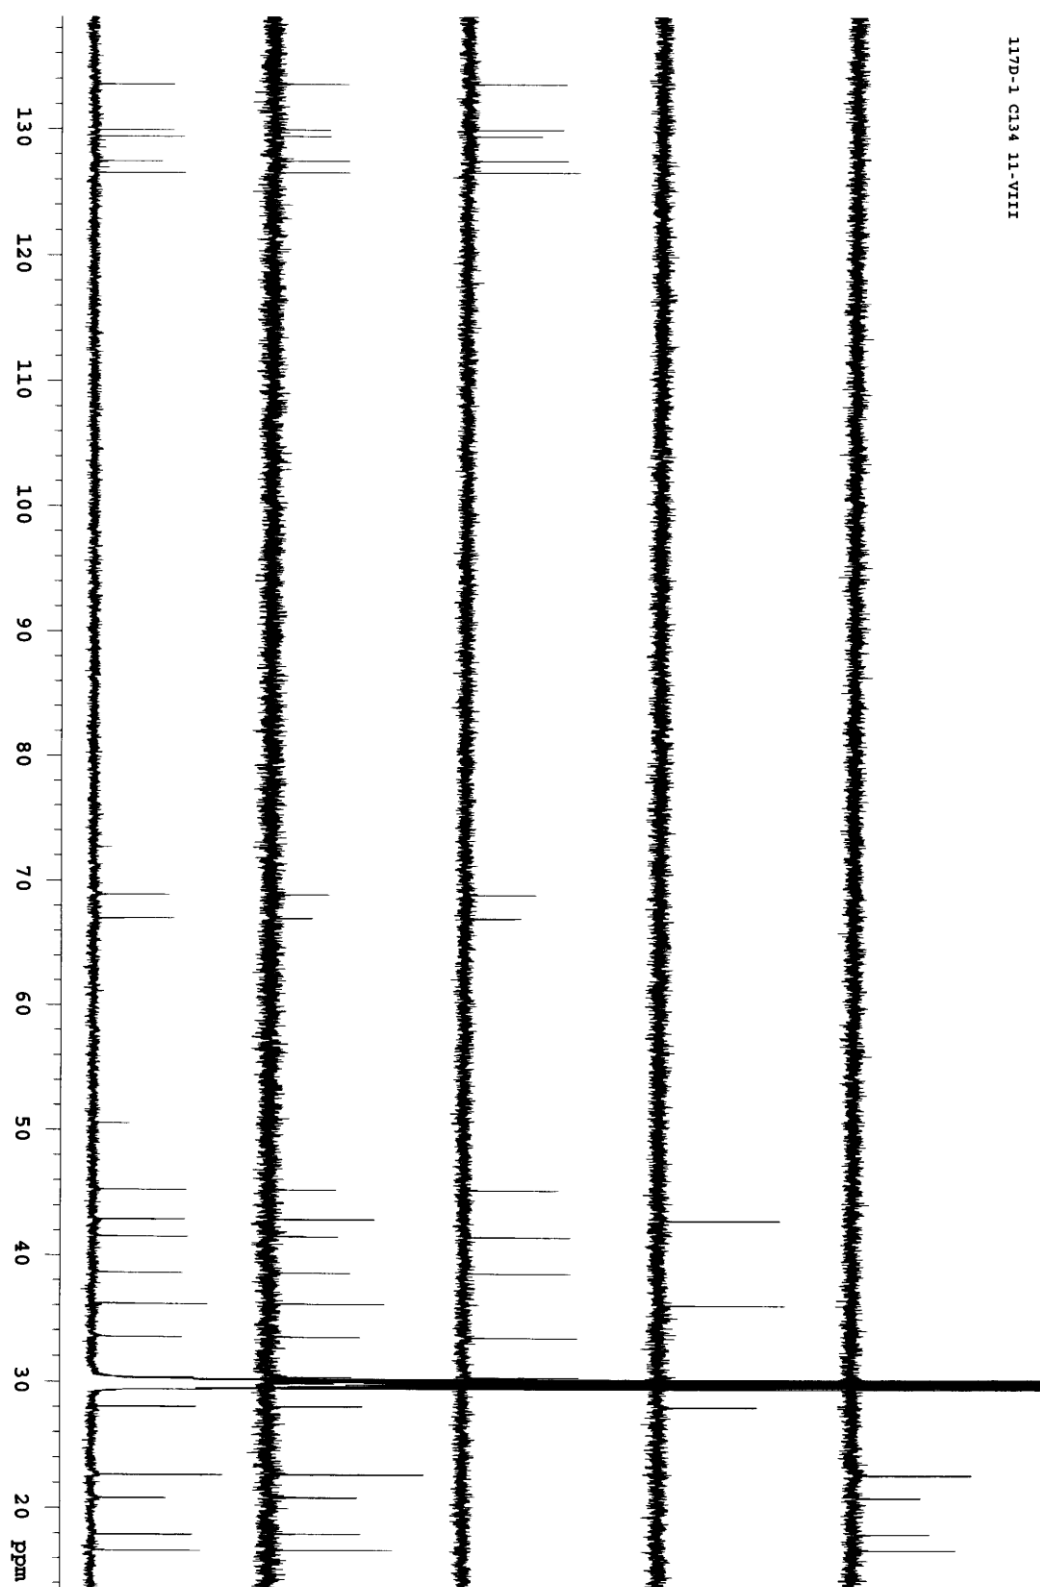

**Figure S26**  $^1\text{H}$ - $^1\text{H}$  COSY of **5**

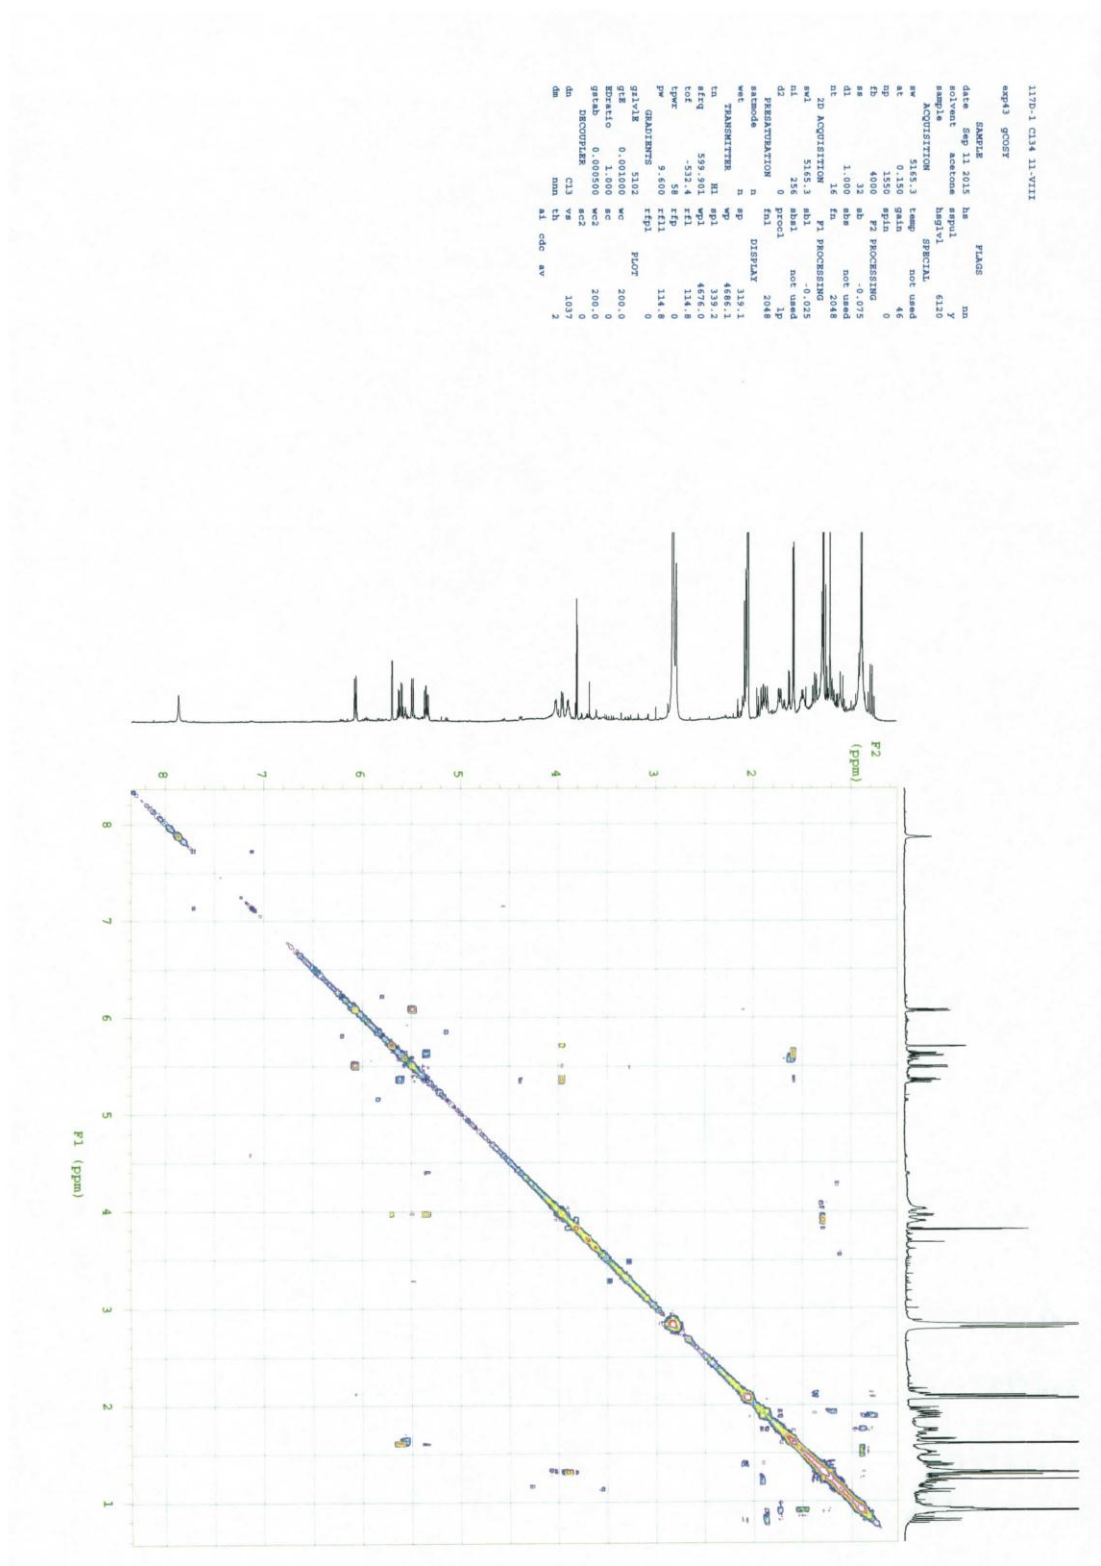



```

117D-1 C134 11-VIII
exp43 PROCY

SAMPLE
date Sep 11 2015 ha
solvent acetone aspl
sample basyl1 6120
ACQUISITION SPECIAL
ac 5165.3 temp not used
at 0.150 gain 46
ap 1350 spin 0
as 4032 ab -0.075
dt 1.000 abx not used
nt 16 fn 2048
2D ACQUISITION F1 PROCESSING
sw1 5165.3 ab1 -0.025
n1 256 abal not used
d2 0 procl 1p
PRESATURATION fn1
satmode n DISPLAY
wet n ap 374.5
ts TRANSMITTER n1 1374.1
rfq n1 1374.0
rfq 559.901 wpt 3077.0
tcf -512.4 rfi 114.8
lpr 56 rfi 0
pw 5.600 rfi 114.8
GRADIENTS 5102 rfi 0
gvlr 0.00100 wc 250.0
gle 0.00100 wc 250.0
grtlo 1.000 ac 0
grtad 0.000500 wc2 200.0
DECOUPLER C13 w 1037
dm nm 12
al cdc av 2

```

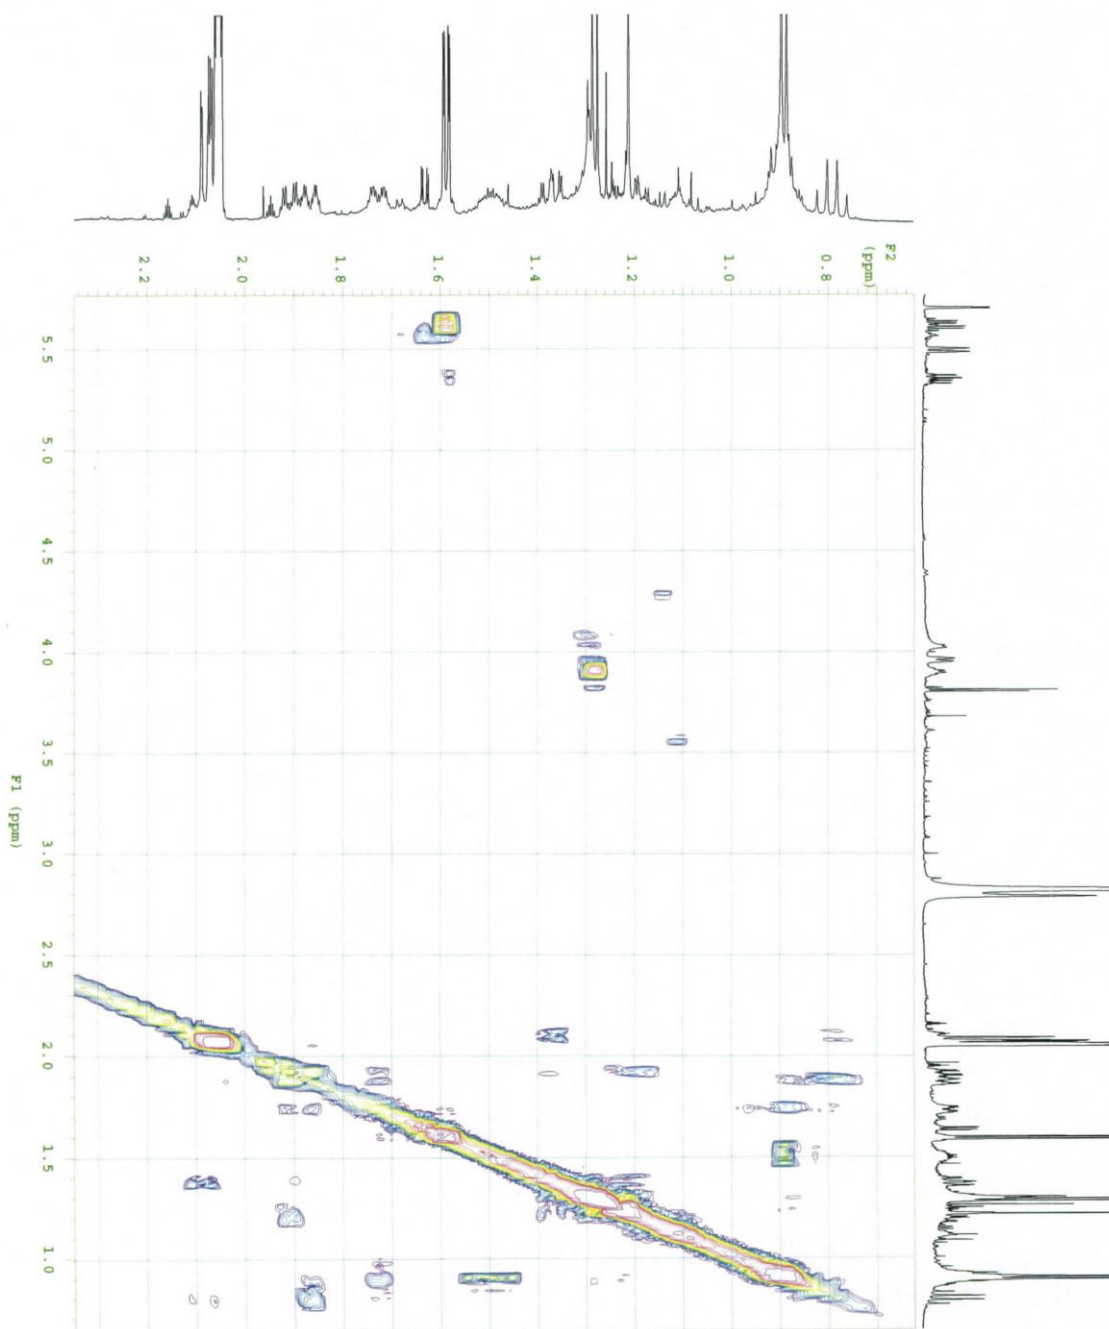

**Figure S27** NOESY of **5**

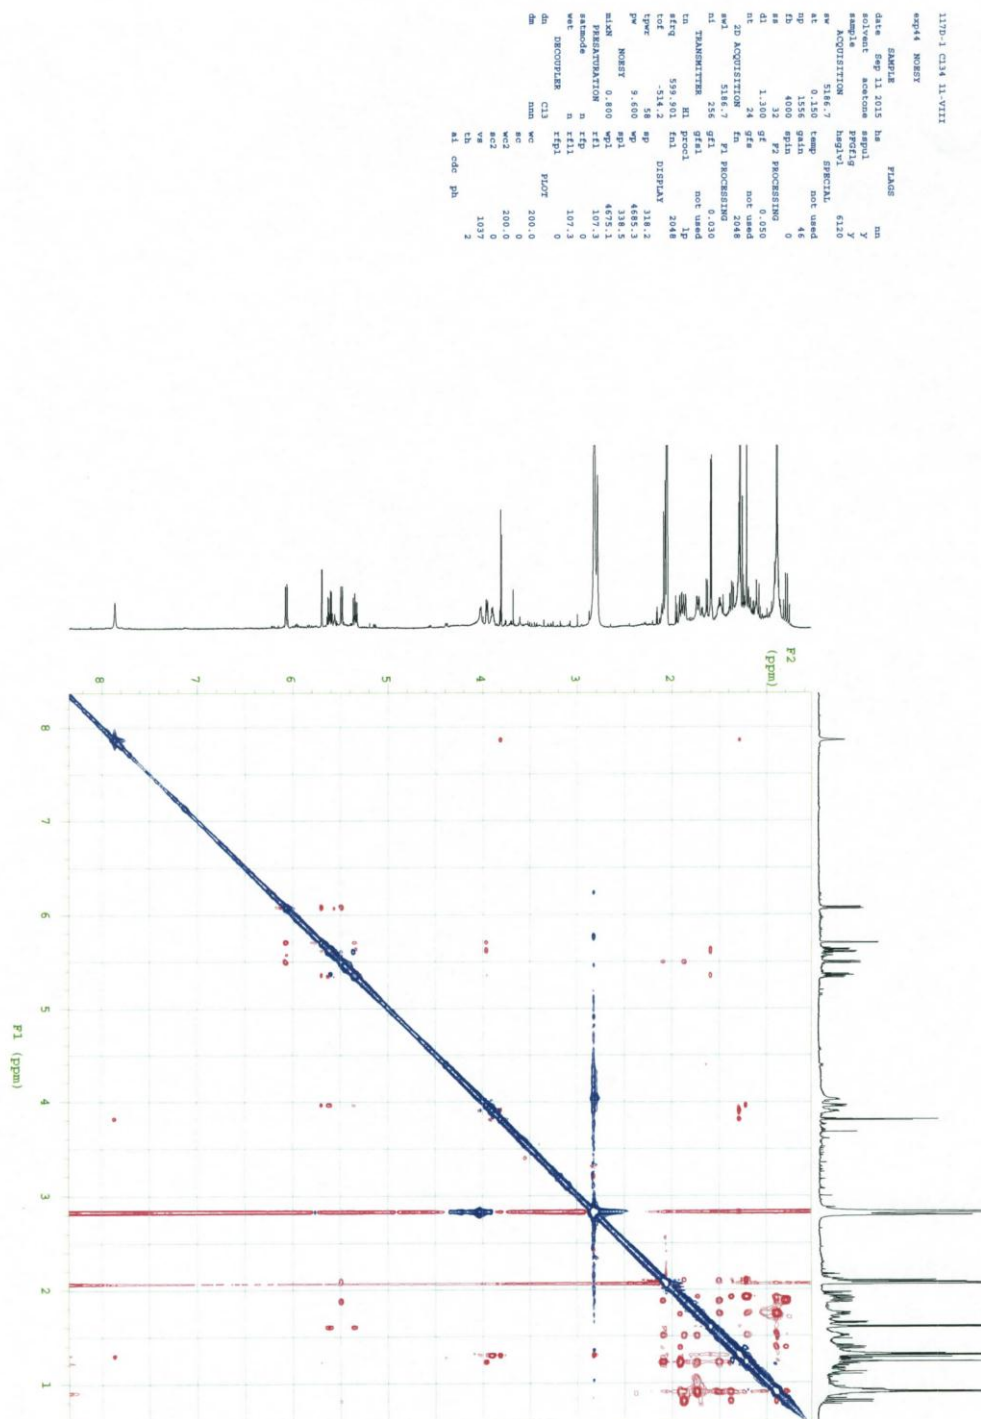

117D-1 C134 11-VIII  
exp44 M085Y

| SAMPLE         |             | FLAGS         |          |
|----------------|-------------|---------------|----------|
| date           | Sep 11 2015 | hs            | nm       |
| solvent        | acetone     | appl          | y        |
| sample         | PPG1g       | PPG1g         | y        |
| ACQUISITION    | hsq1v1      | 6120          |          |
| sw             | 5186.7      | SPECTRA       |          |
| nt             | 0.150       | temp          | not used |
| td             | 0.150       | spin          | 46       |
| fb             | 4000        | spin          | 46       |
| as             | 32          | F2 PROCESSING |          |
| dl             | 1.300       | gfs           | not used |
| nt             | 24          | gfs           | 2048     |
| 2D ACQUISITION | fn          | F1 PROCESSING |          |
| sw1            | 5186.7      | gfs1          | 0.030    |
| nl             | 256         | gfs1          | not used |
| TRANSMITTER    | nl          | proc1         | 1p       |
| tn             | 599.901     | fn1           | 2048     |
| sfreq          | -514.2      | sp            | DIRECT   |
| ufreq          | 9.600       | wpi           | 1053.6   |
| pw             | 9.600       | wpi           | 1058.6   |
| mlw            | 0.800       | rfl           | 107.3    |
| PRESATURATION  | n           | rfg           | 0        |
| satmode        | n           | rfl1          | 107.3    |
| wet            | n           | rfl1          | 0        |
| DECOUPLER      | CL13        | rfp1          | 0        |
| dm             | nm          | wg            | 200.0    |
|                | ac          | wd2           | 200.0    |
|                | wd3         | wd3           | 1037     |
|                | th          | at            | cdc      |
|                | ph          |               | 2        |

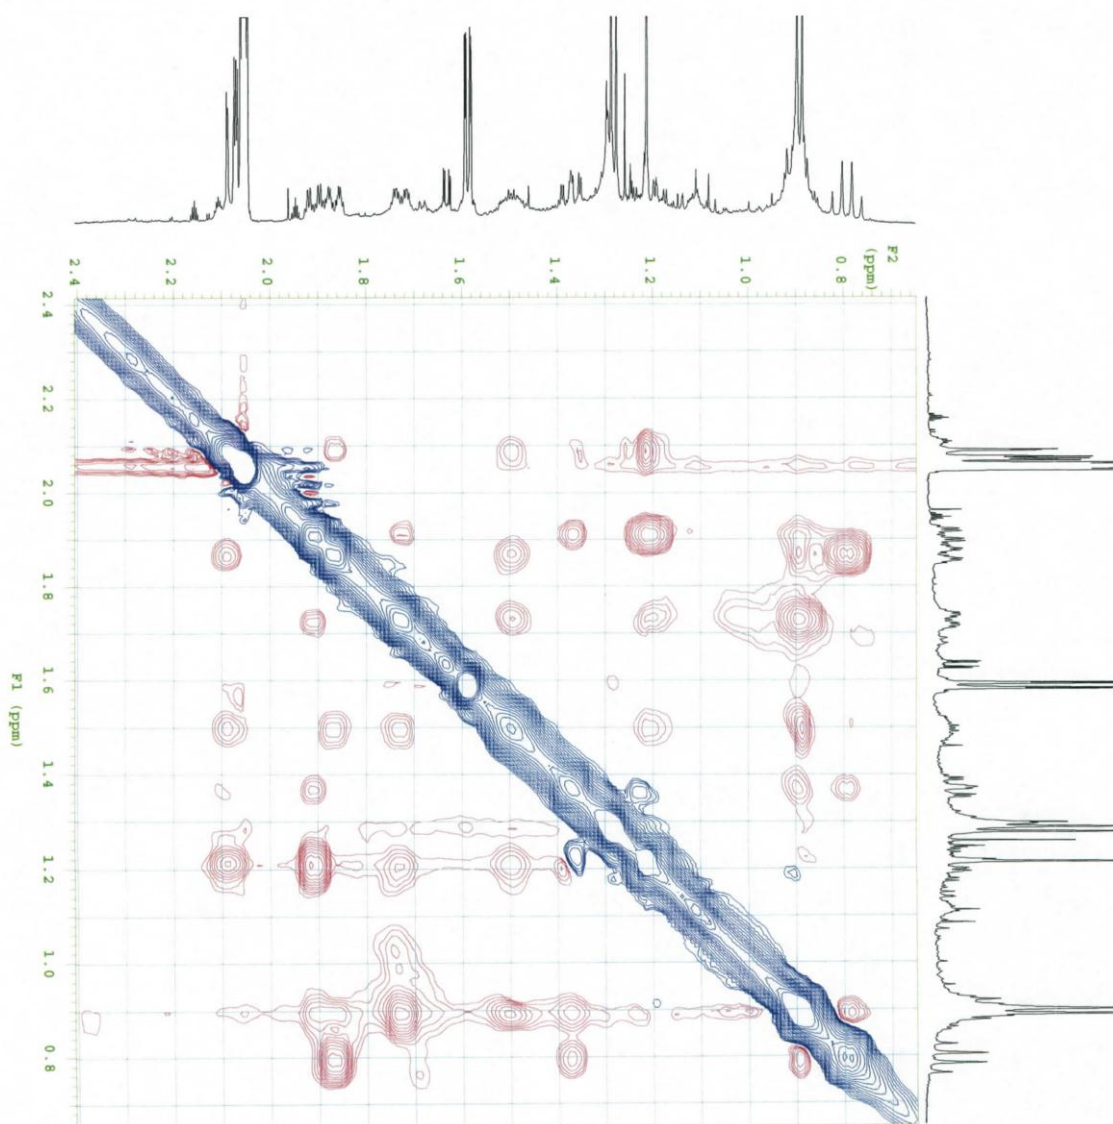

90

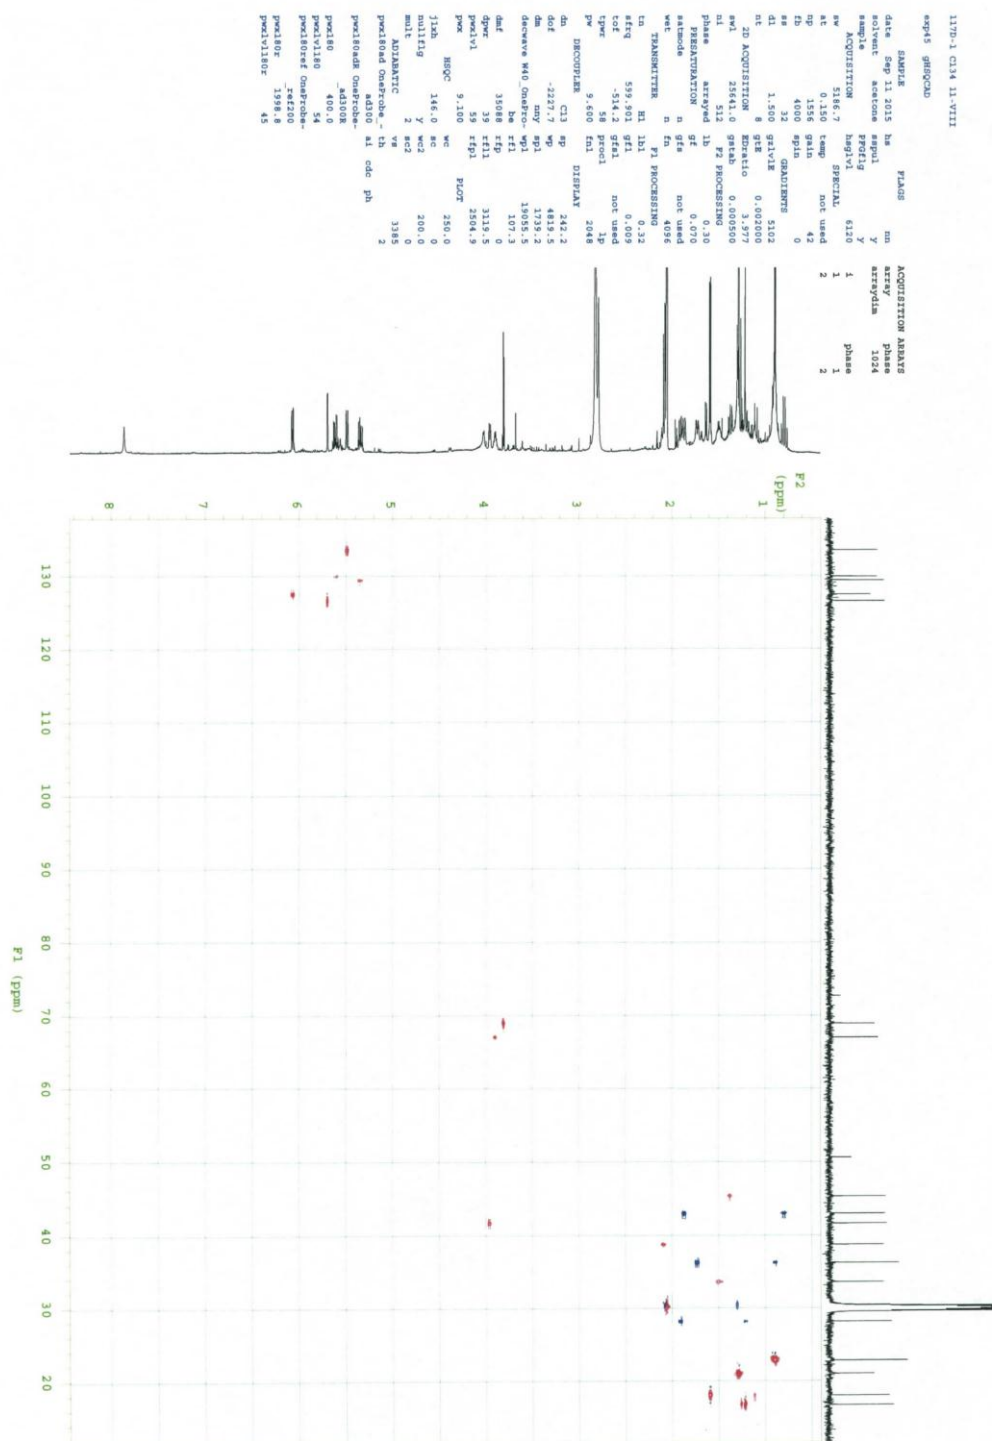

exp45 ghsqcal

```

pex10aDr OneProb-
- ad30R
pex180 400.0
pex1v180 54
pex180ref OneProb-
- ref200
pex180r 198.8
pex1v180r 45

```

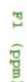



92

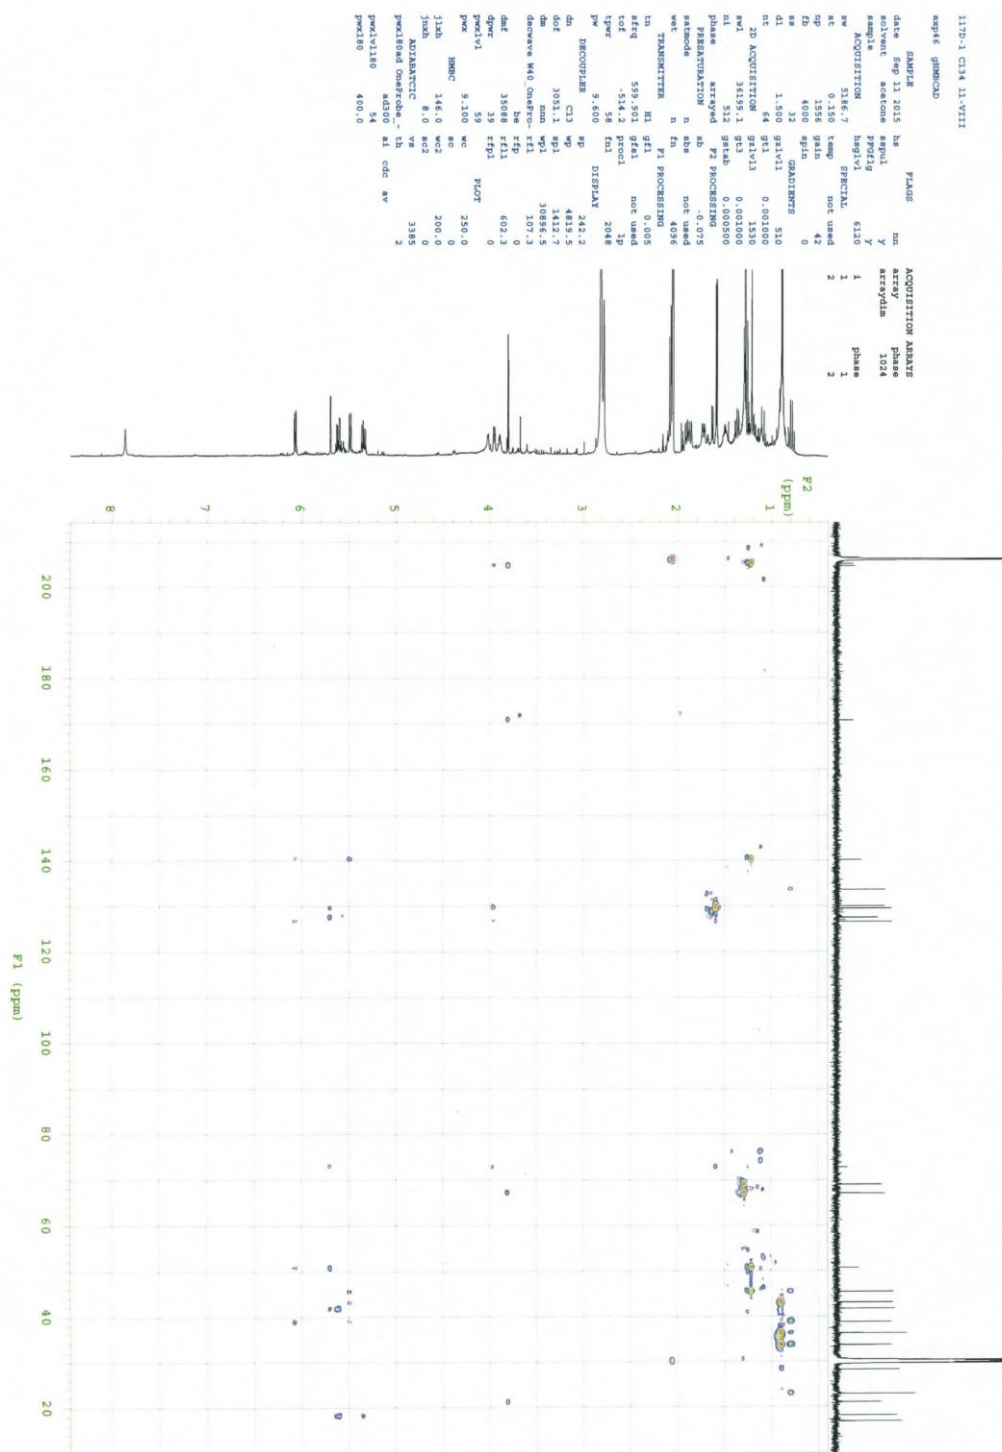

```

117D-1 C134 11-VIII
exp46 gbmocno

SAMPLE          FLAGS
date Sep 11 2015  ha
solvent acetone  spul
sample          y
ACQUISITION     basylv1 6120 1
nr 5186.7 SPECIAL 2
ac 0.150 temp not used 42
cp 4000 spin 0
ss 32 GRADIENTS 0
nt 1.500 gtlv11 510
2D ACQUISITION gtlv13 1330
wv1 36199.1 gtlv13 0.001000
nl 512 gtlv13 0.000500
phase arrayed F2 PROCESSING
PRESATURATION ab -0.075
astmode n abx not used
wet TRANSMITTER n En not used
in n1 gtlv1 F1 PROCESSING 4096
afcg 559.901 gtlv1 not used
tcf -514.2 ptool 1p
tper 56 fml DISPLAY 2048
pv 9.600

DECOUPLER      sp
dn C13 wp 267.6
dof 3051.1 wpl 3641.8
dm nm wpl 2473.2
decouple W40 Qnastro-F1 9261.9
dnt hz fpl 107.3
dper 35088 fcl 602.3
tper1 39 fpl 0
pex1v1 55 fpl F1OT 0
pex 9.100 wc 280.0
HMC 0
jkh 146.0 wc2 200.0
ADJANTATIC vs 0
pex180d Qnastro-F1 3385
pex1v1180 Ad100 at cdc wv 2
pex180 400.0

```

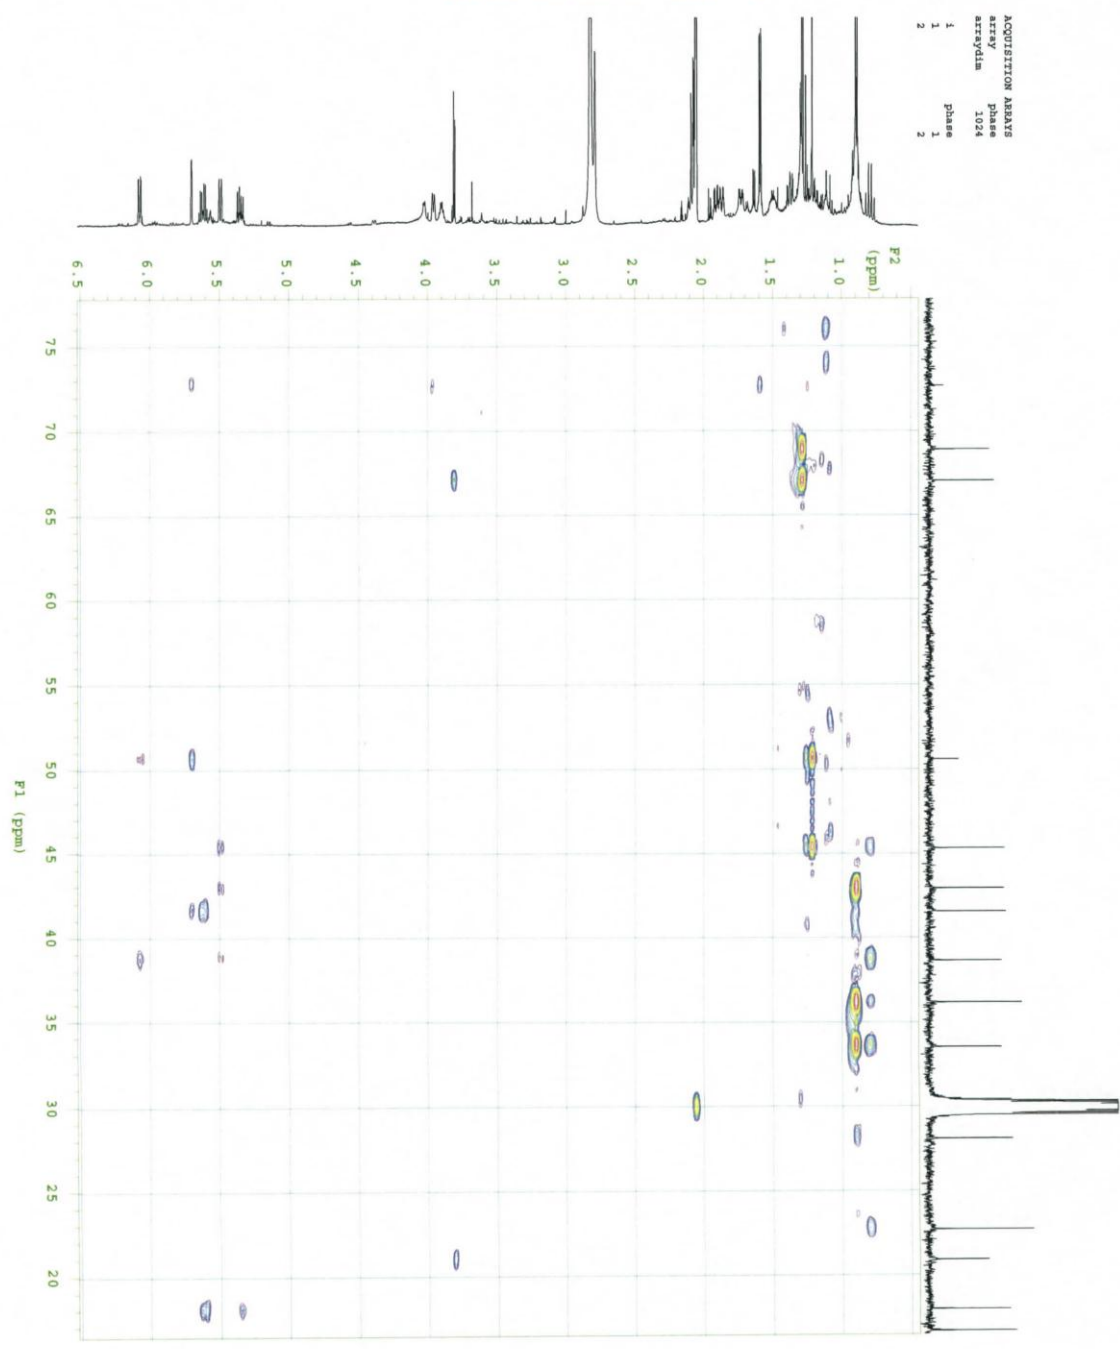





Figure S30 FABMS of 5

2

[ Elemental Composition ]

Data : 1601029                      Date : 12-Jan-2016 16:38                      Page: 1

Sample: 117D-1 C134-11-VIII

Note : Matrix; NBA

Inlet : Direct                      Ion Mode : FAB+

RT : 7.29 min                      Scan#: (38,43)

Elements : C 30/20, H 35/25, N 3/0, O 6/0

Mass Tolerance : 20ppm, 1mmu if m/z > 50

Unsaturation (U.S.) : -1.0 - 30.0

| Observed m/z | Int%  | Err[ppm / mmu] | U.S. Composition    |
|--------------|-------|----------------|---------------------|
| 398.2332     | 100.0 | +0.1 / +0.0    | 9.5 C 24 H 32 N O 4 |

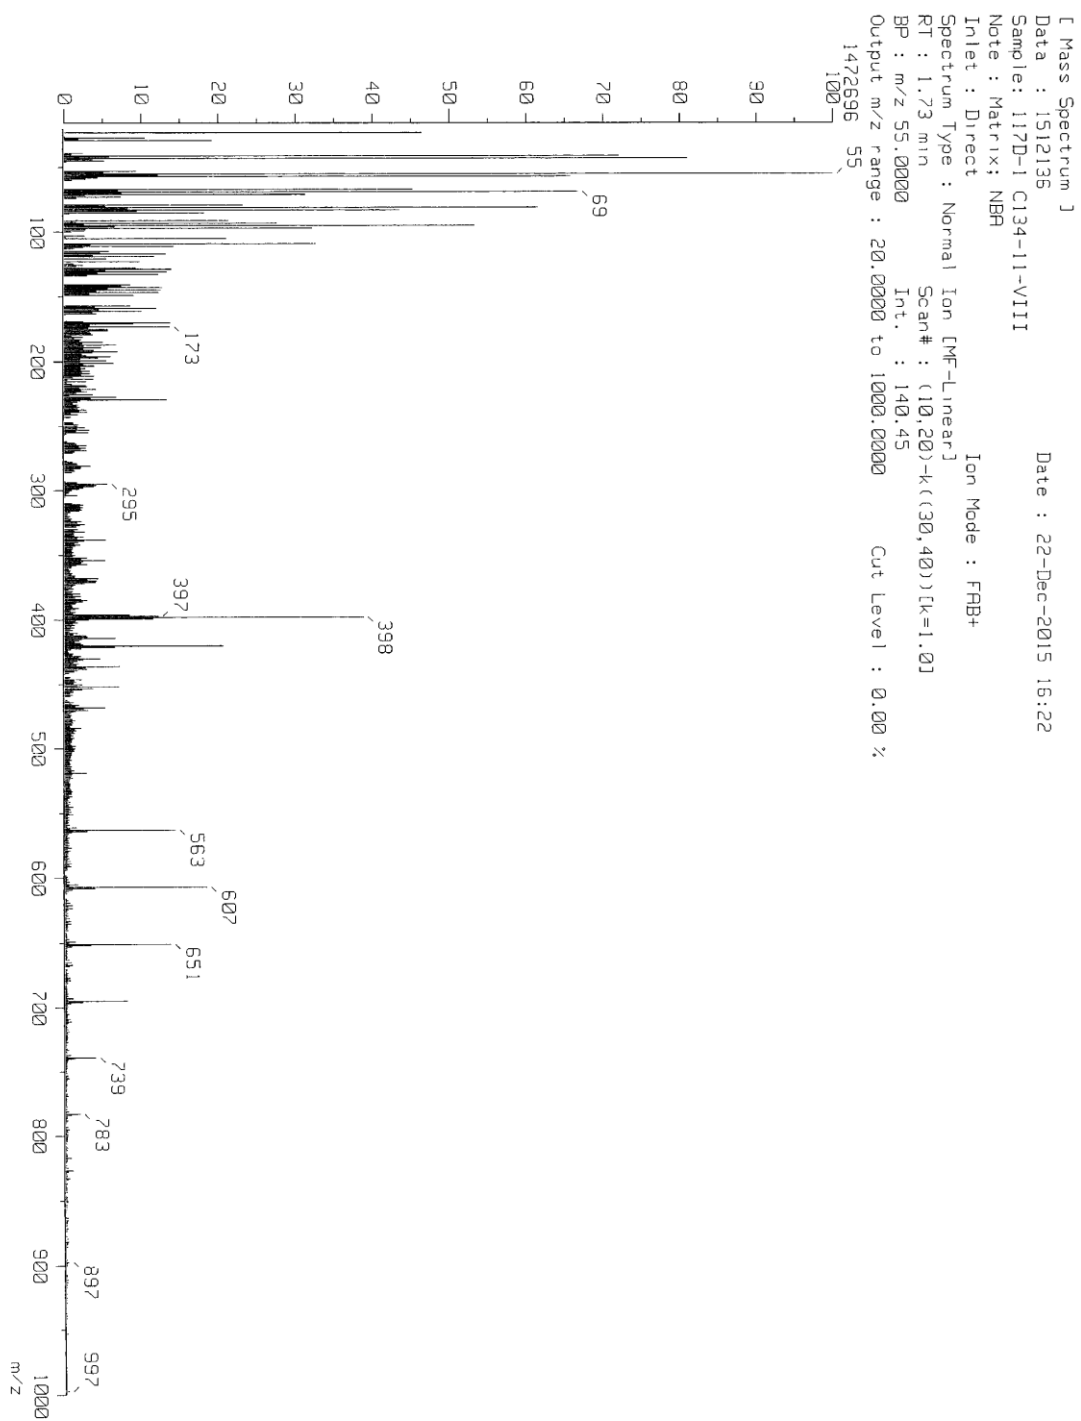

Supplement: s1 [file s1]
