# Supplementary material for: Altercrasins A–E, Decalin Derivatives, from a Sea-Urchin-Derived Alternaria sp.: Isolation and Structural Analysis Including Stereochemistry
Source: MDPI journal article supplement (doi:10.3390/md17040218), 2019-04-11

Figure S13  $^1\text{H}$  and  $^{13}\text{C}$  NMR spectra in acetone- $d_6$  of **3**

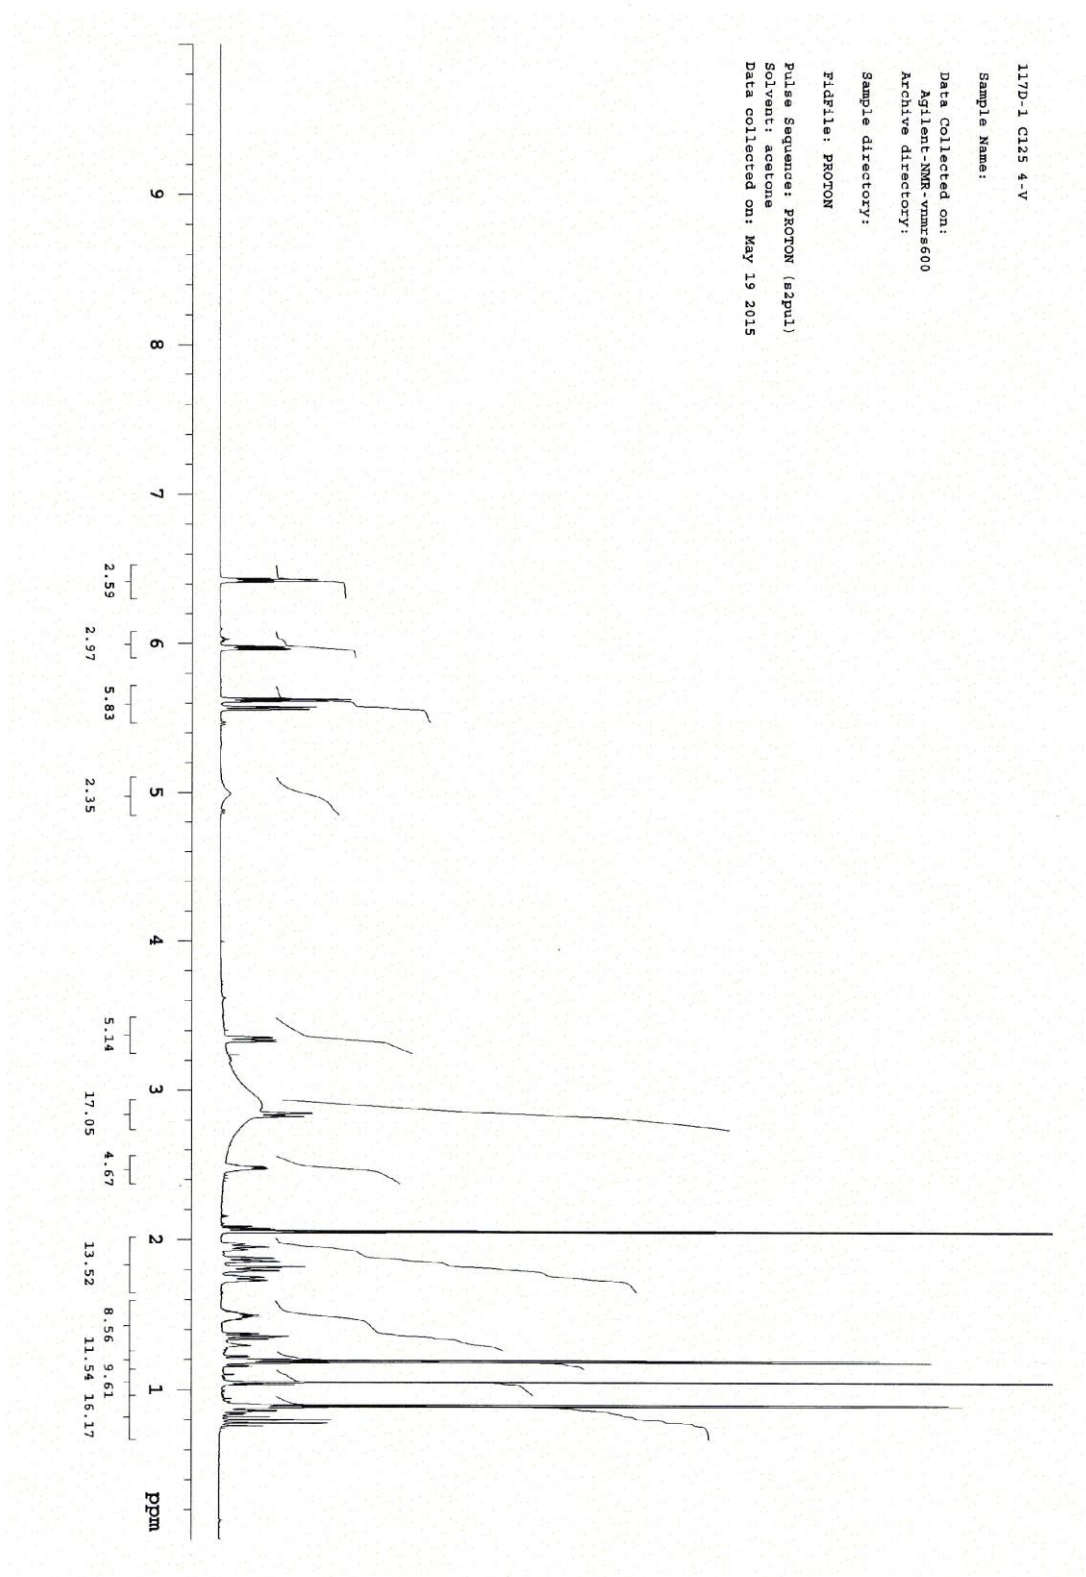

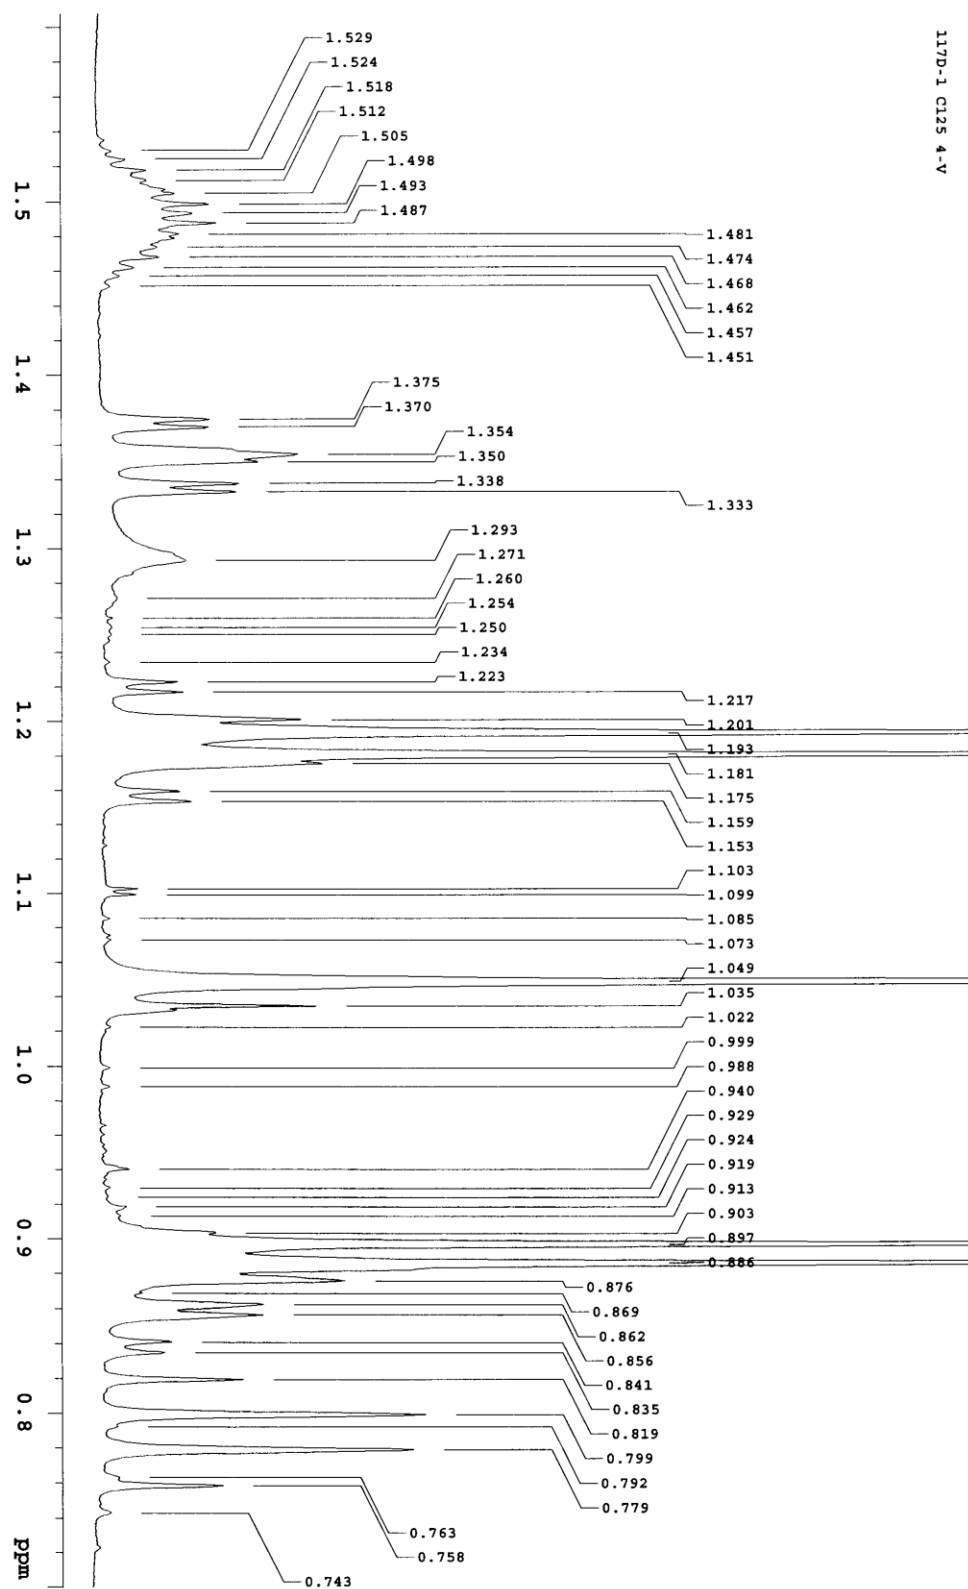

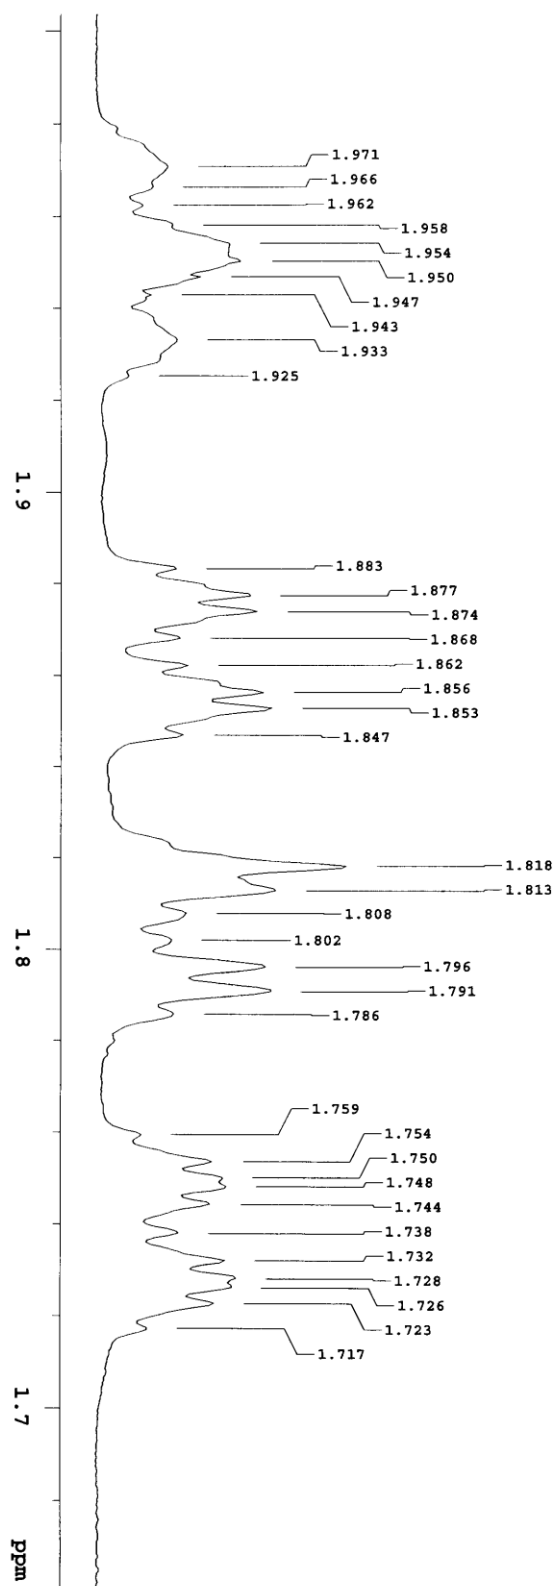

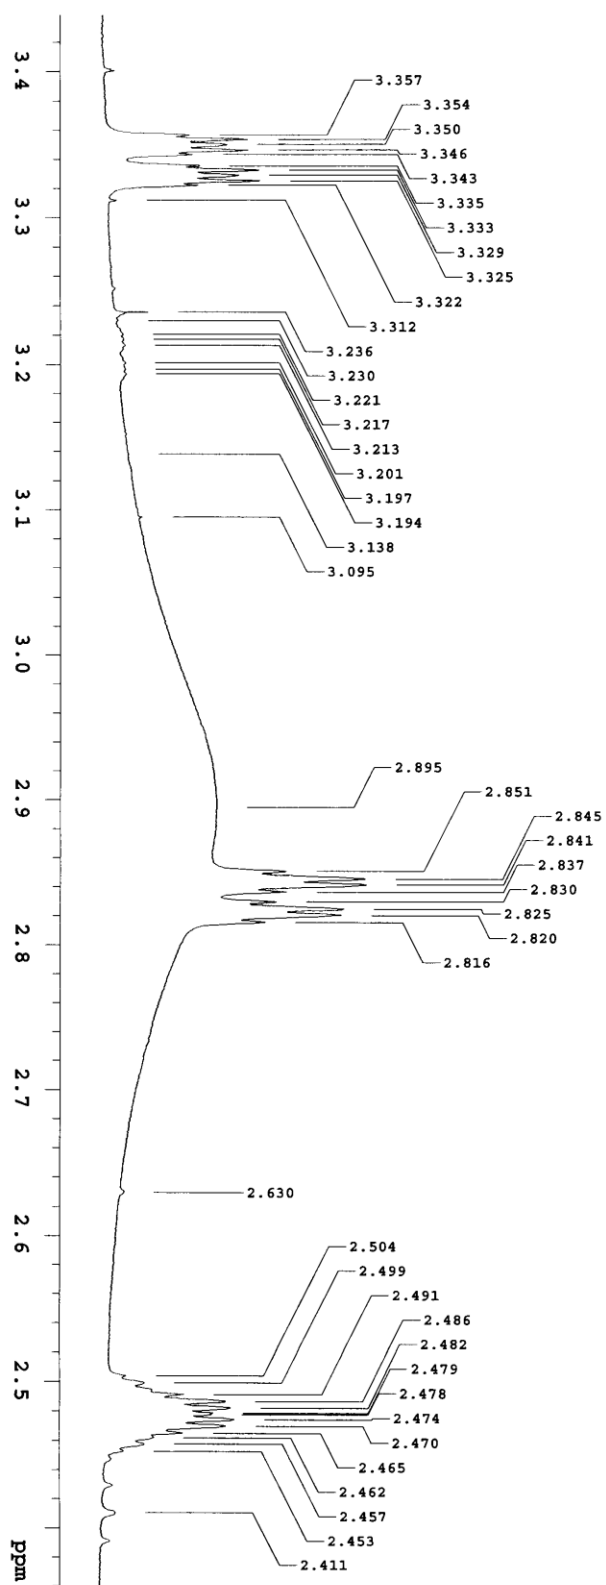

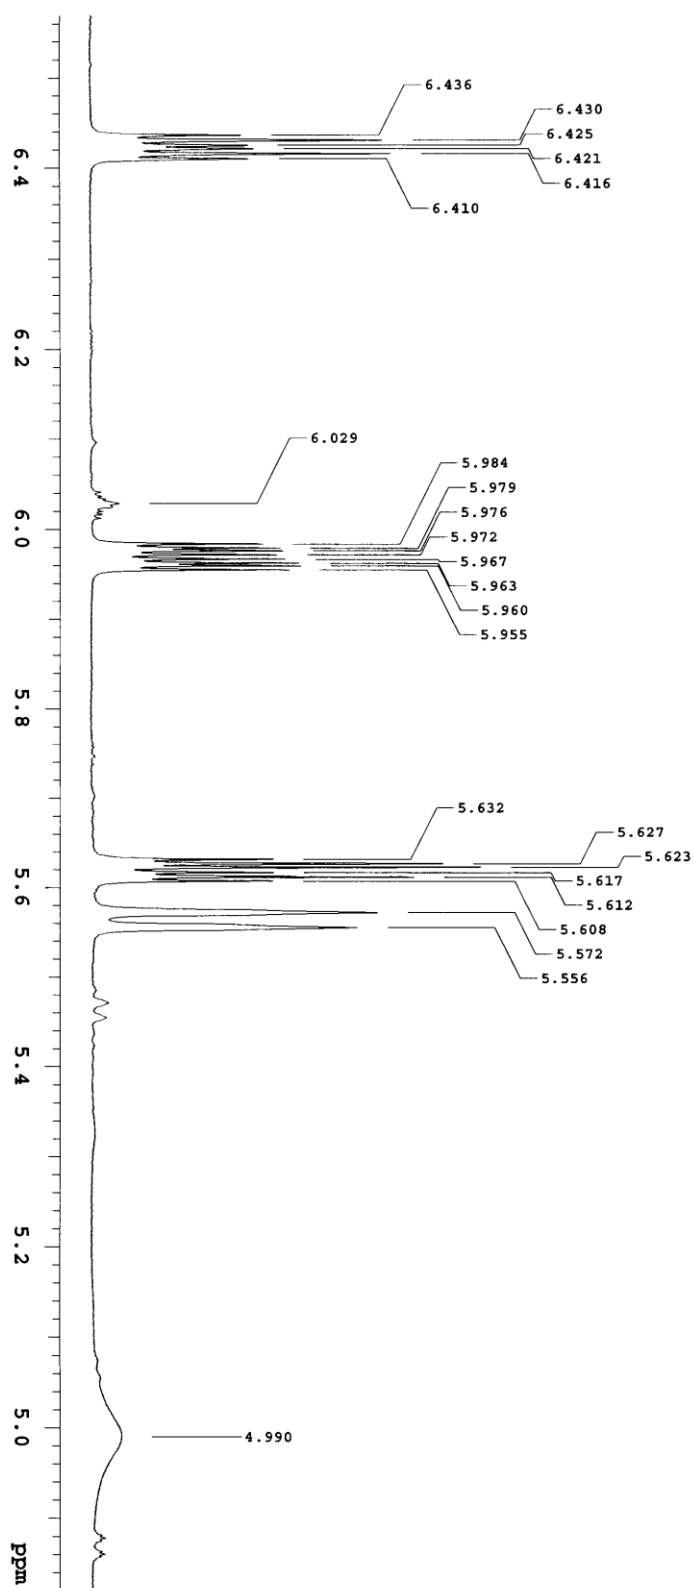

117D-1 CH25 4-V

Sample Name:

Data Collected on:

Agilent-NMR-vnmrse600

Archive directory:

Sample directory:

F1DFile: CARBON

Pulse Sequence: CARBON (szpul)

Solvent: acetone

Data collected on: May 19 2015

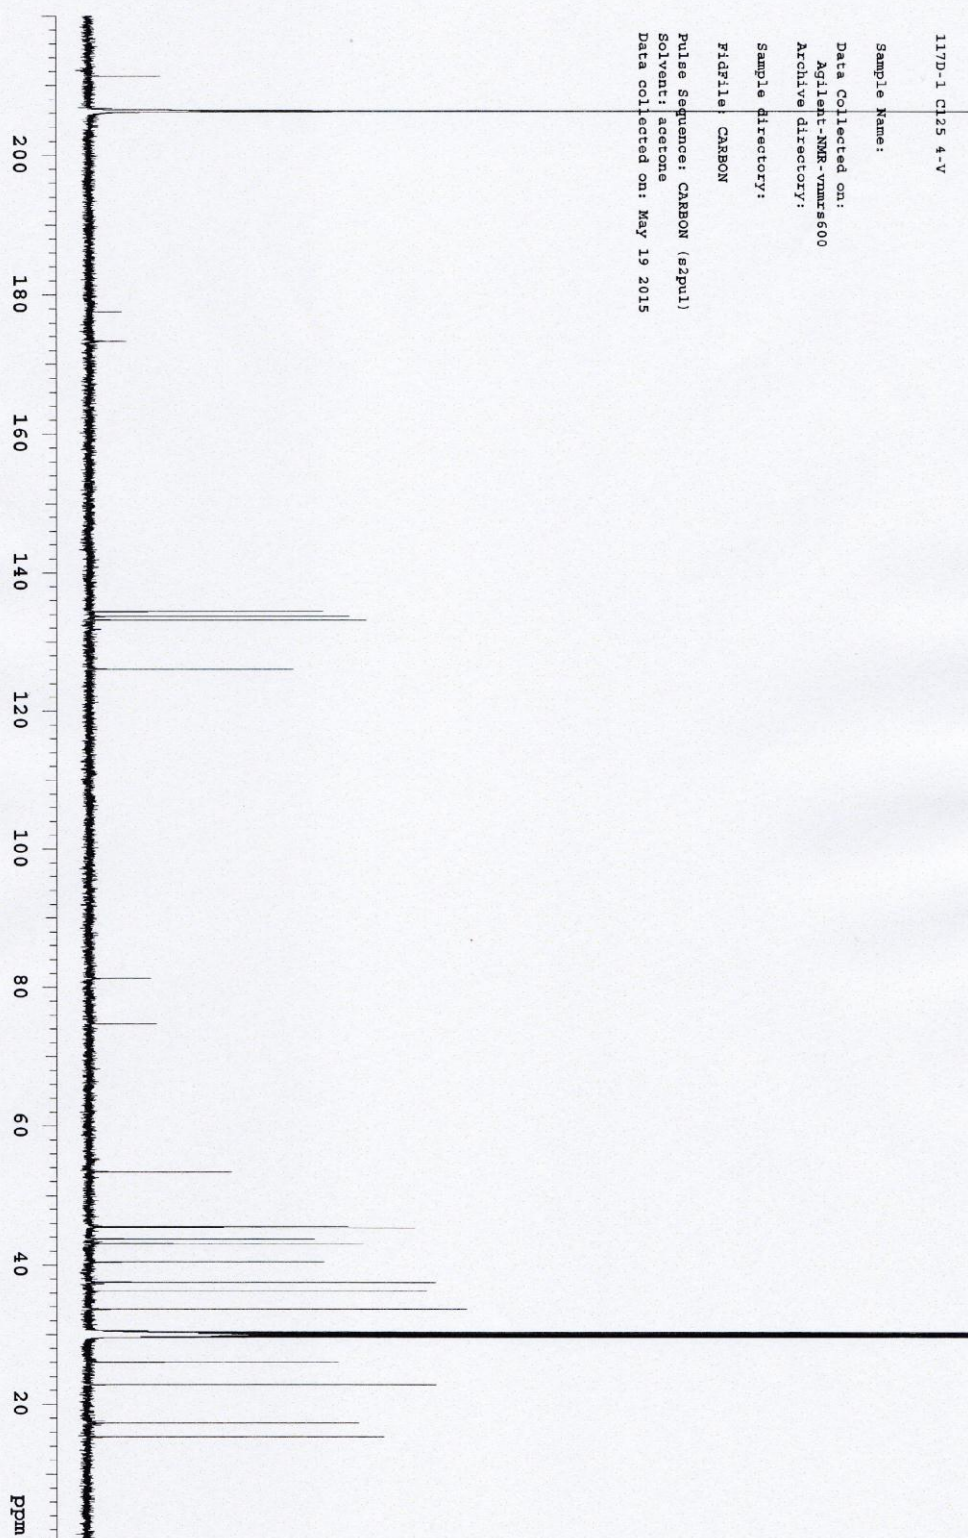

117D-1 C125 4-V

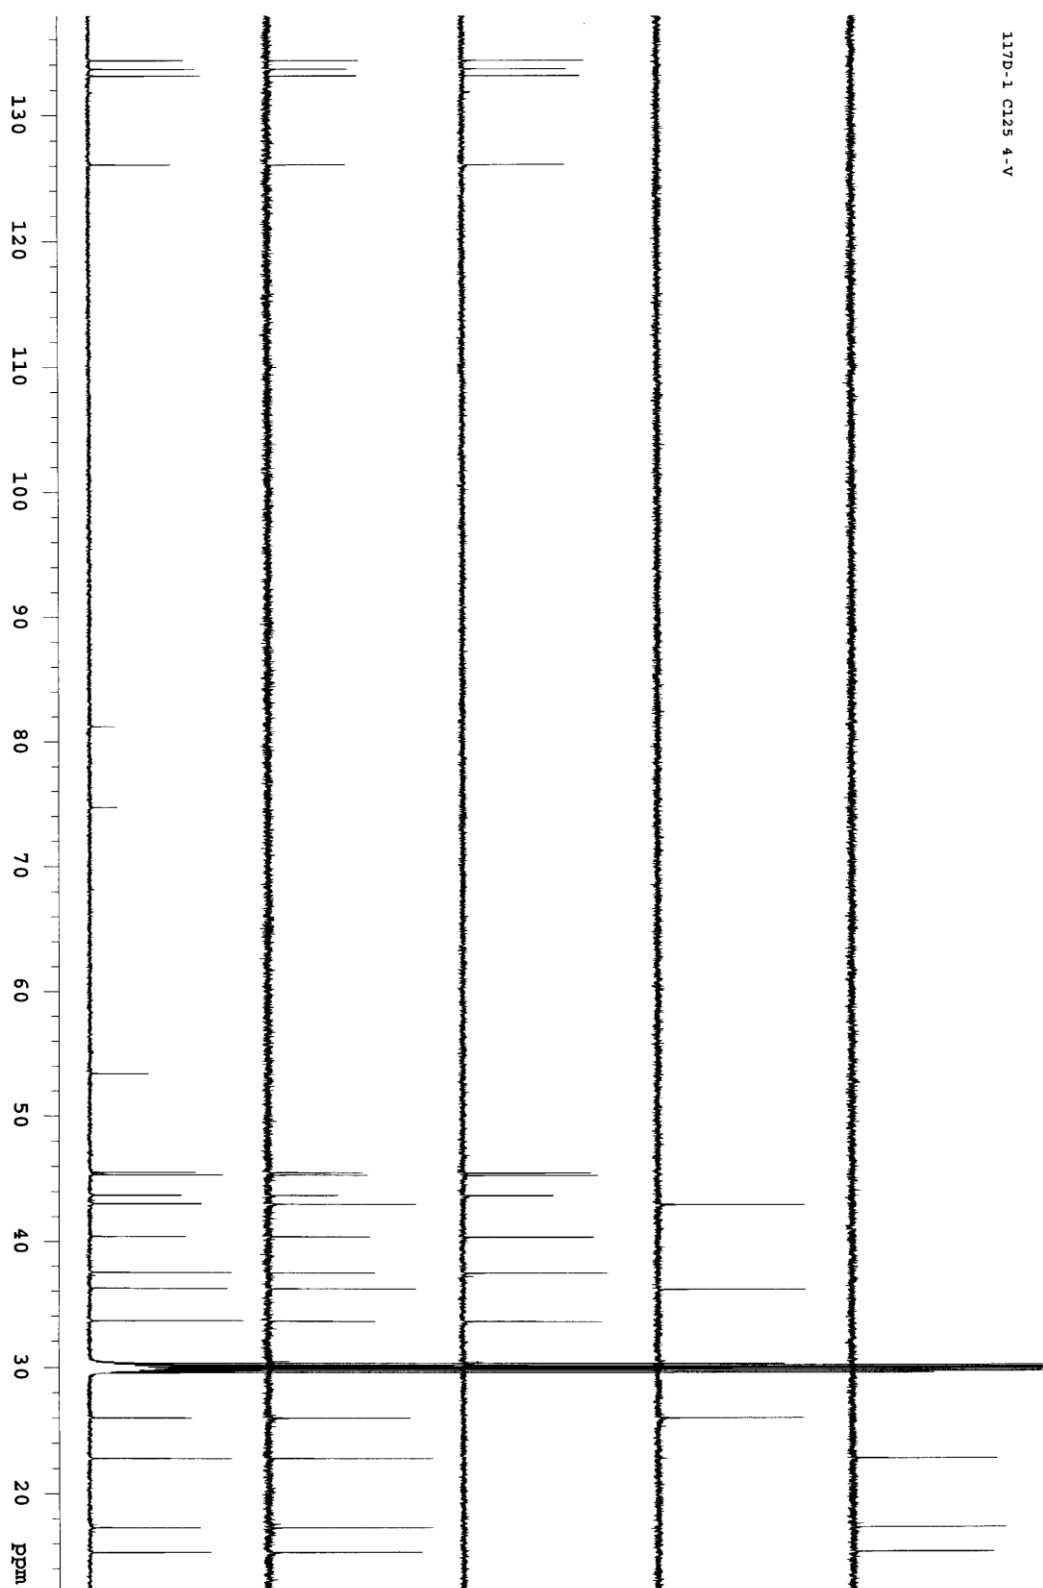

**Figure S14**  $^1\text{H}$ - $^1\text{H}$  COSY of **3**

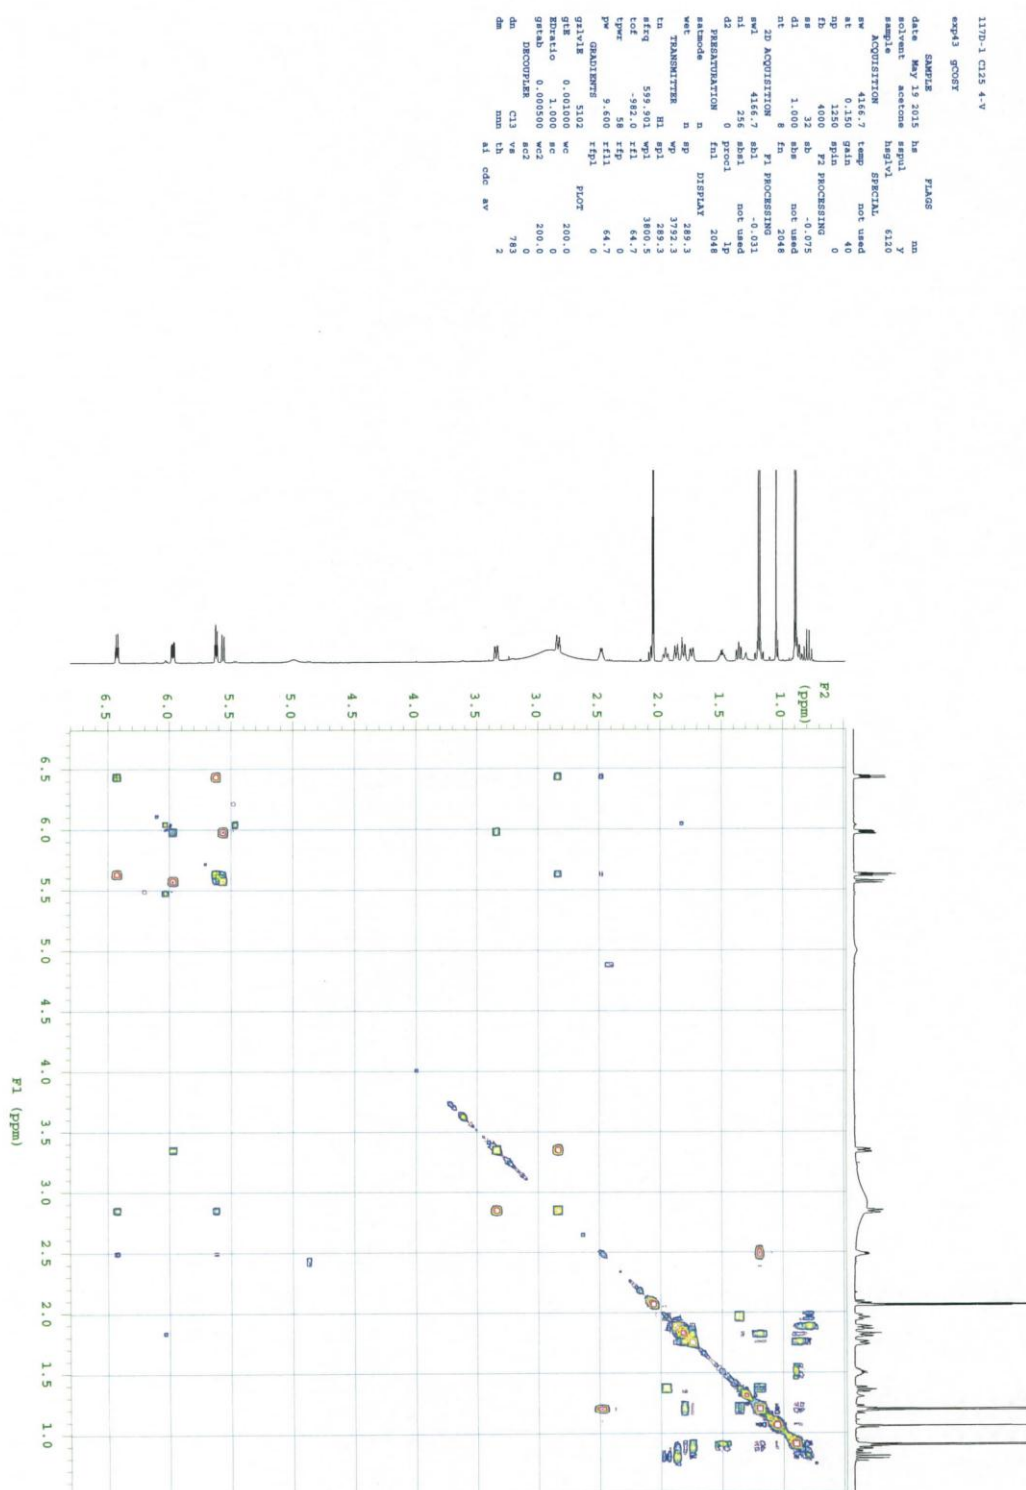



exp43 gcosy

a1 cdc av

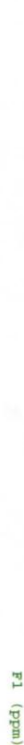

Figure S15 NOESY of 3

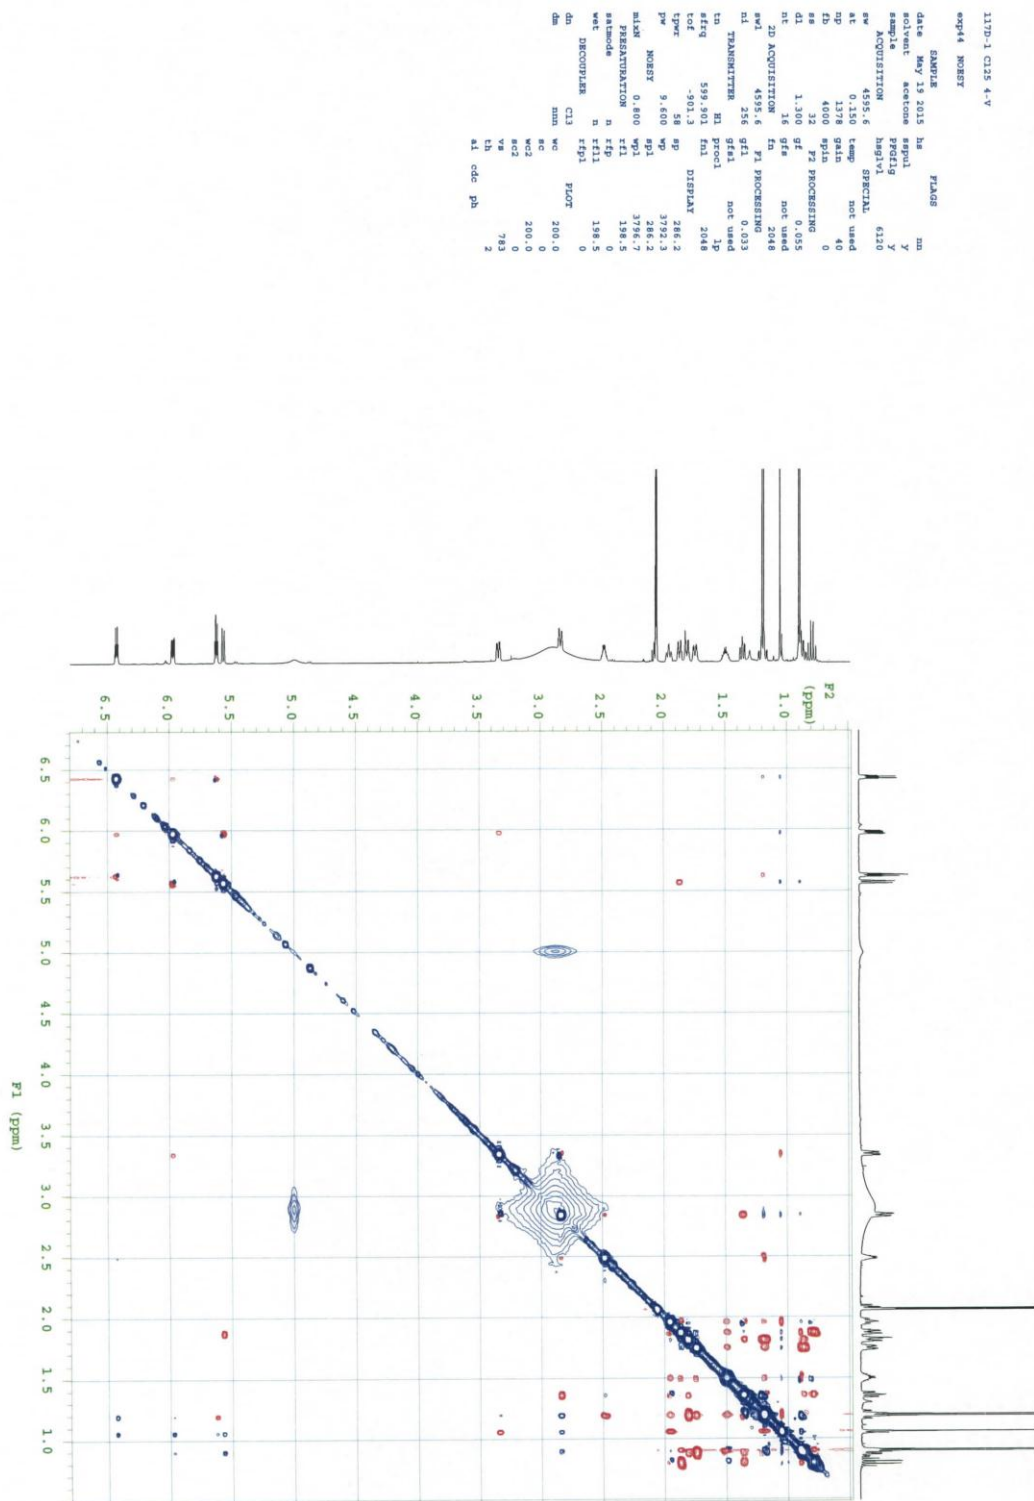

117D-1 C125 4-V  
exp4 NOESY

| SAMPLE         |             | FLAGS         |              |
|----------------|-------------|---------------|--------------|
| date           | May 19 2015 | hs            | mn           |
| solvent        | acetone     | sepal         | y            |
| sample         | pyridig     | y             |              |
| sample         | bag1v1      | 6120          |              |
| ACQUISITION    |             |               |              |
| ac             | 4595.6      | SPECIAL       | not used     |
| at             | 0.150       | temp          | not used     |
| az             | 0.125       | spin          | not used     |
| fb             | 4000        | sp12          | 40           |
| ss             | 32          | P2 PROCESSING | 0            |
| d1             | 1.300       | gfe           | 0.055        |
| nt             | 16          | gfe           | not used     |
| 2D ACQUISITION |             |               |              |
| sw1            | 4595.6      | F1 PROCESSING | 2048         |
| nl             | 256         | gfe1          | 0.033        |
| tl             | TRANSMITTER | gfe1          | not used     |
| tr             | MI          | prec1         | 1p           |
| efrq           | 599.901     | fm1           | DISPLAY 2048 |
| tofr           | -901.3      | sp            | 380.5        |
| upwr           | 13.545      | wp1           | 950.0        |
| pw             | 9.600       | wp1           | 380.5        |
| mlsm           | 0.800       | wp1           | 911.0        |
| PRESATURATION  |             |               |              |
| satmode        | n           | rfg           | 198.5        |
| wet            | n           | rfg1          | 0            |
| decoupler      | n           | rfg1          | 198.5        |
| dm             | C13         | PLOT          | 200.0        |
| dm             | nm          | wc            | 200.0        |
| ac             | 0           | wc2           | 200.0        |
| wd             | 0           | wd2           | 785          |
| vb             | 2           | vb            | 2            |
| al             | cdc         | ph            |              |

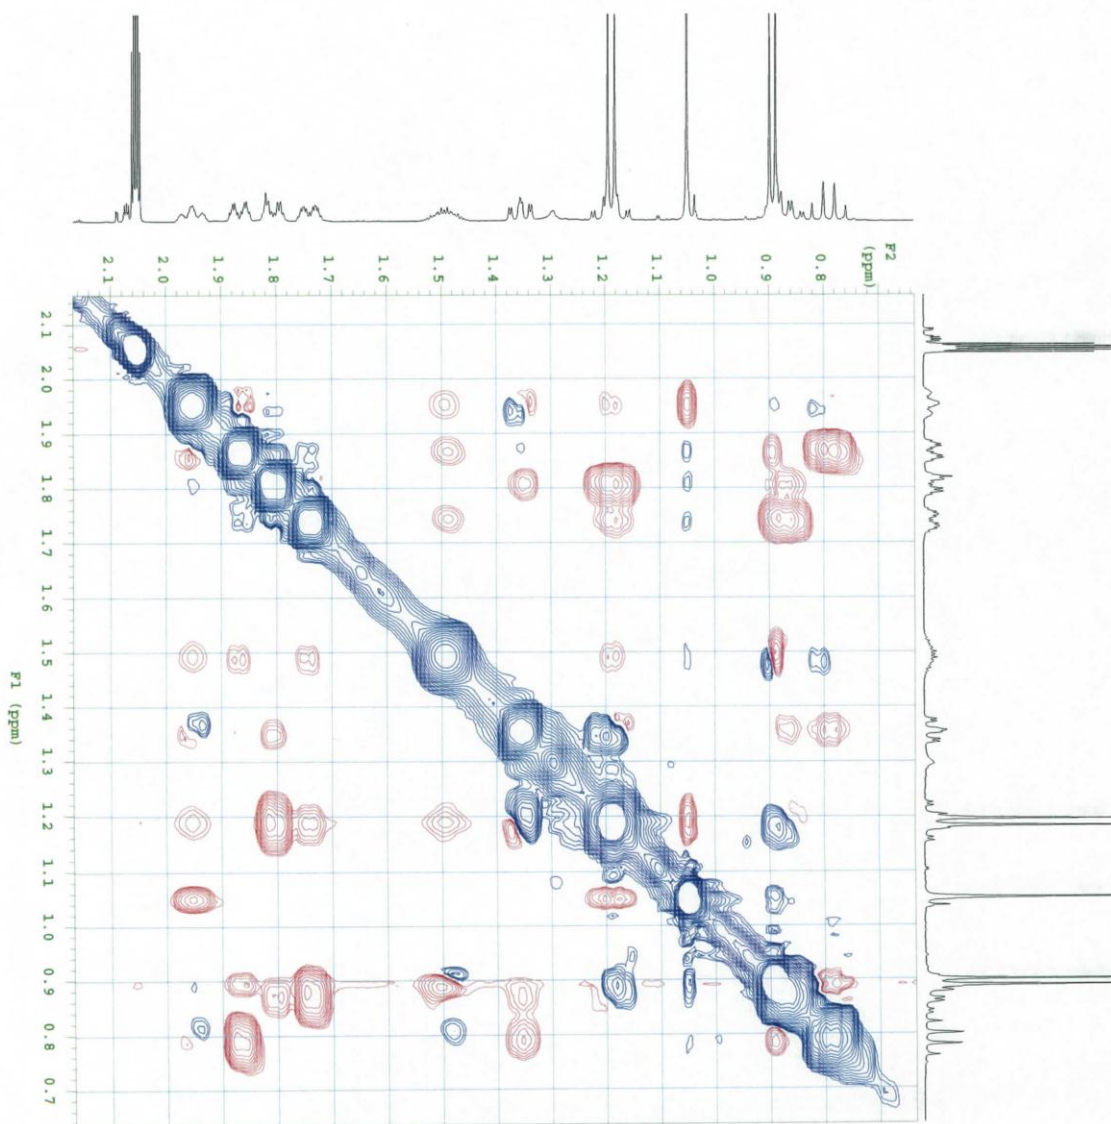

Figure S16 HMQC of 3

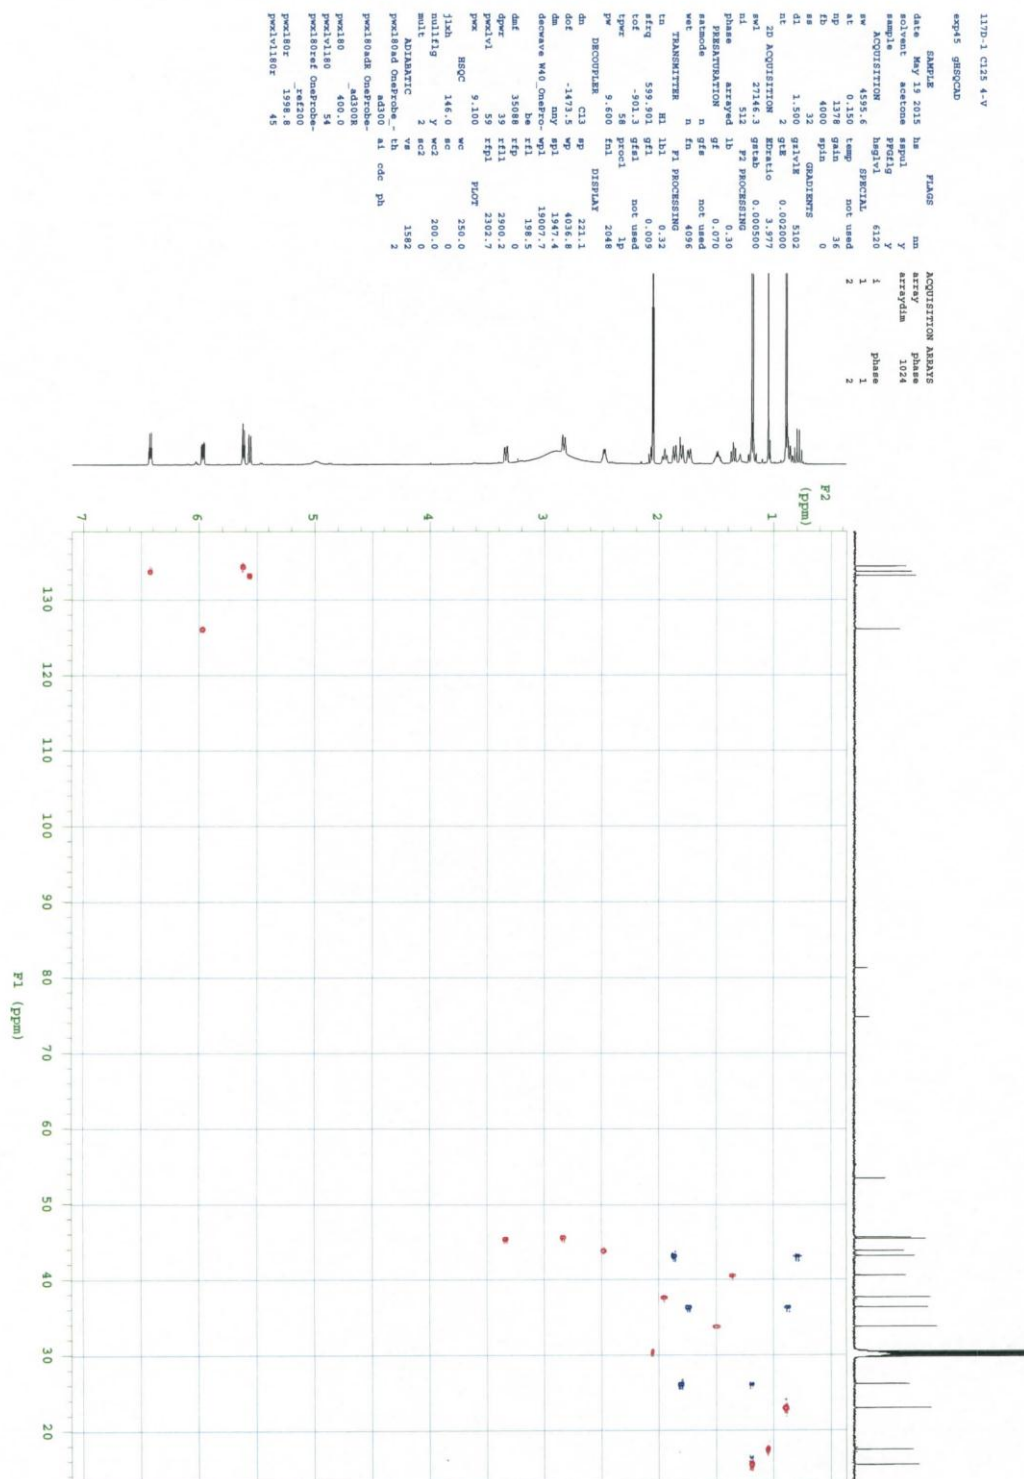

117D-1 C125 4-V  
exp45 ghsocld

| SAMPLE         |             | FLAGS         |          | ACQUISITION ANALYSIS |       |
|----------------|-------------|---------------|----------|----------------------|-------|
| date           | May 15 2015 | hs            | nm       | array                | phase |
| solvent        | acetone     | suppl         | y        | arraydim             | 1024  |
| sample         | pyridine    | proflg        | y        |                      |       |
| ACQUISITION    | hsq1v1      | 6120          | 1        | phase                | 1     |
| nr             | 4595.6      | temp          | not used | 1                    | 2     |
| ac             | 0.150       | spin          | 36       |                      |       |
| dp             | 0.150       | spin          | 36       |                      |       |
| fs             | 4000        | spin          | 36       |                      |       |
| ss             | 32          | GRADIENTS     | 0        |                      |       |
| dl             | 1.500       | gr1v1e        | 5102     |                      |       |
| nt             | 2           | gr2           | 0.002000 |                      |       |
| 2D ACQUISITION | Hdratio     | 3.977         |          |                      |       |
| sv1            | 27146.3     | gr2ab         | 0.000500 |                      |       |
| nl             | 512         | F2 PROCESSING | 0.30     |                      |       |
| phase          | arrayed 1b  | gr            | 0.070    |                      |       |
| PRESENTATION   | gr          | not used      |          |                      |       |
| atmode         | n           | gr            | not used |                      |       |
| wt             | TRANSMITTER | n             | 4096     |                      |       |
| to             | 0.150       | F1 PROCESSING | 0.32     |                      |       |
| afreq          | 559.901     | gr1           | 0.009    |                      |       |
| tot            | -901.3      | gr1           | not used |                      |       |
| lpr            | 58          | procl         | 1p       |                      |       |
| pw             | 9.600       | fn1           | 2048     |                      |       |
| DECOMPOSE      |             |               |          |                      |       |
| dh             | C13         | sp            | 322.1    |                      |       |
| dof            | -1473.5     | wp            | 1819.8   |                      |       |
| dm             | any         | sp1           | 2053.5   |                      |       |
| decawa         | W40         | Qnsrco        | 4983.9   |                      |       |
| def            | 3508.0      | he            | 188.5    |                      |       |
| dpr            | 39          | ft1           | 2880.2   |                      |       |
| psk1v1         | 55          | rfp1          | 2382.7   |                      |       |
| pw             | 9.100       | wt            | 250.0    |                      |       |
| HQC            |             |               |          |                      |       |
| j1kh           | 146.0       | ac            | 0        |                      |       |
| nullf1g        | y           | wc2           | 200.0    |                      |       |
| mult           | 2           | ac2           | 0        |                      |       |
| ADDITIONAL     |             |               |          |                      |       |
| psk180ad       | Qnsrco      | th            | 1582     |                      |       |
| psk180ad       | Qnsrco      | th            | 2        |                      |       |
| psk180         | 400.0       |               |          |                      |       |
| psk1v1180      | 54          |               |          |                      |       |
| psk180ref      | Qnsrco      |               |          |                      |       |
| psk180c        | 1398.8      |               |          |                      |       |
| psk1v1180c     | 45          |               |          |                      |       |

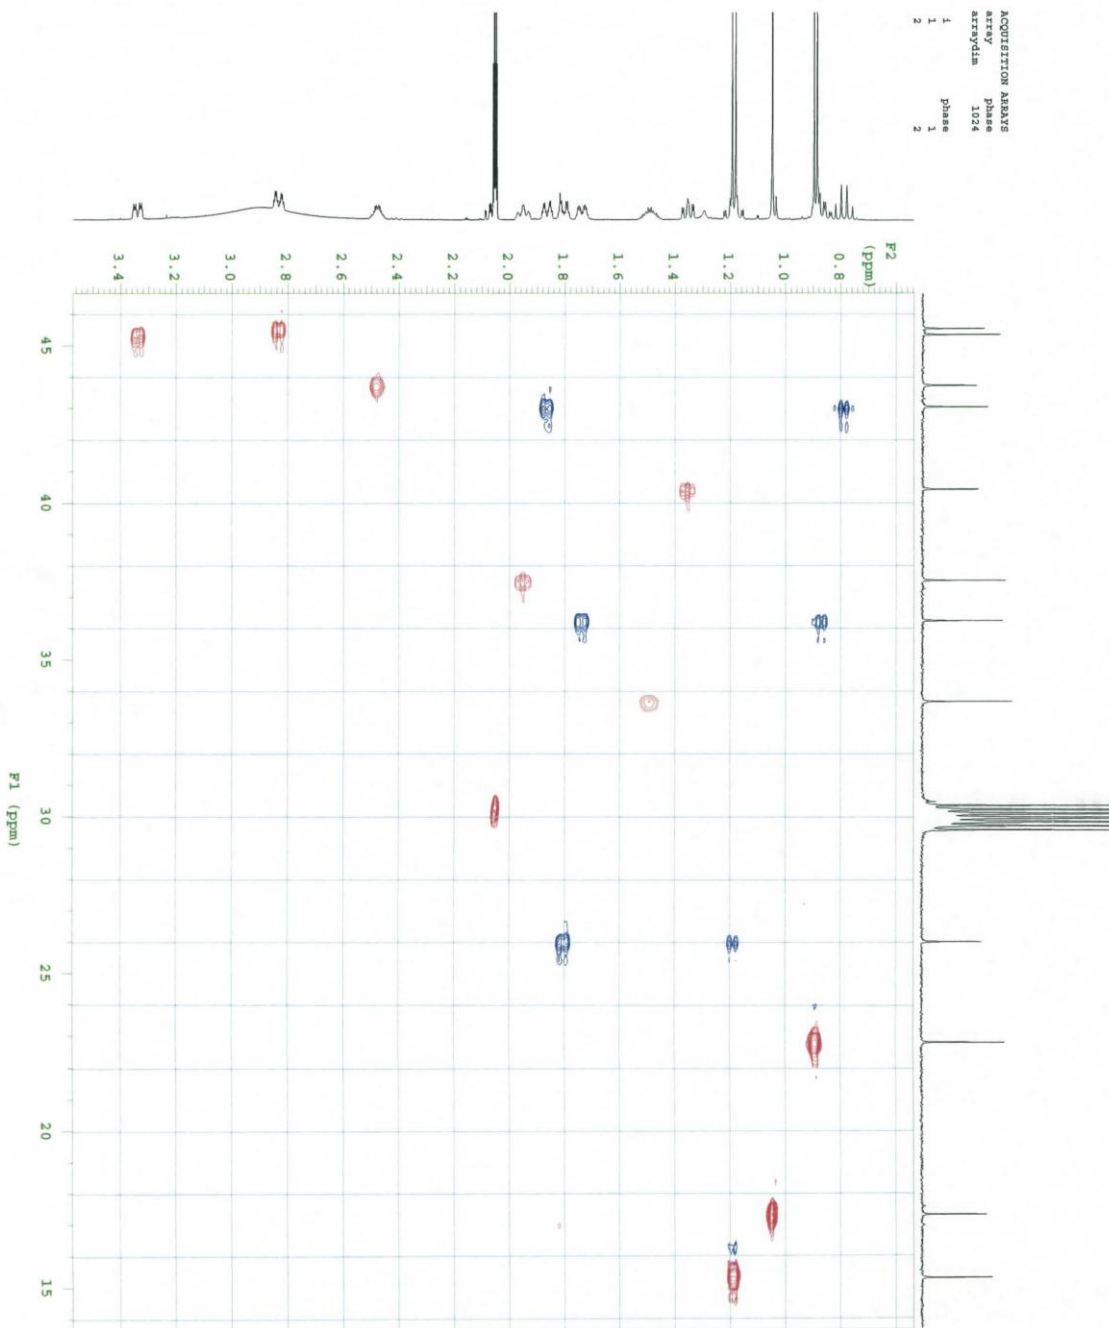



[illegible]







**Figure S18 FABMS of 3**

[ Elemental Composition ] <sup>22</sup>  
Data : 1506059 Date : 10-Jun-2015 15:54 Page: 1  
Sample: 117D-1 C125-4-V  
Note : Matrix; G  
Inlet : Direct Ion Mode : FAB+  
RT : 8.41 min Scan#: (27,32)  
Elements : C 30/17, H 32/22, N 3/0, O 6/0, Na 1/0  
Mass Tolerance : 20ppm, 1mmu if m/z > 50  
Unsaturation (U.S.) : -1.0 - 50.0

| Observed m/z | Int% | Err[ppm / mmu] | U.S. | Composition        |
|--------------|------|----------------|------|--------------------|
| 392.1839     | 37.4 | +0.4 / +0.2    | 9.5  | C 22 H 27 N O 4 Na |

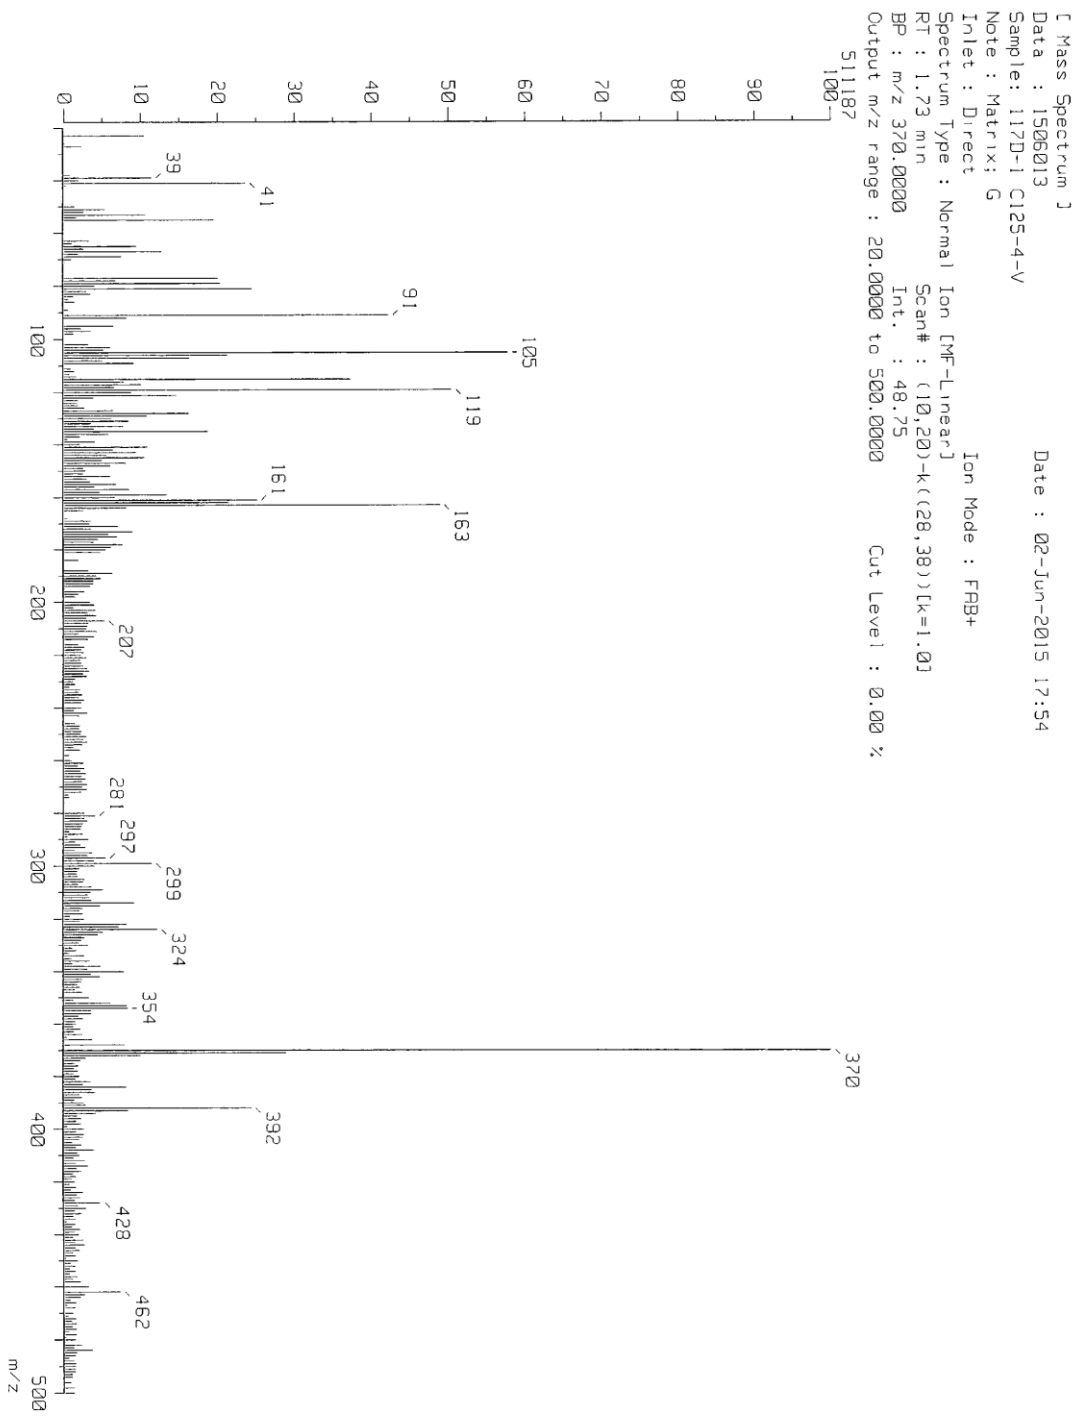

Supplement: s1 [file s1]
